# Supplementary material for: Iron-catalyzed α-C–H functionalization of π-bonds: cross-dehydrogenative coupling and mechanistic insights
Source: PubMed Central journal article supplement — Chem Sci. 2020 Oct 16;11(45):12316–22. doi: 10.1039/d0sc05091a (PMC8163013; doi:10.1039/d0sc05091a), 2020-10-16

## Supporting Information for

# Iron-Catalyzed $\alpha$ -C–H functionalization of $\pi$ -Bonds: Cross-Dehydrogenative Coupling and Mechanistic Insights

*Yidong Wang, Jin Zhu, Rui Guo, Haley Lindberg, and Yi-Ming Wang\**

*Department of Chemistry, University of Pittsburgh, Pittsburgh, Pennsylvania 15260, United States*

*E-mail: ym.wang@pitt.edu*

## Contents

|                                                                                                   |    |
|---------------------------------------------------------------------------------------------------|----|
| General Information:.....                                                                         | 2  |
| Mechanistic experiments.....                                                                      | 3  |
| Stoichiometric experiments for Cp-based complexes.....                                            | 3  |
| Stoichiometric experiments for Cp*-based complexes.....                                           | 5  |
| Kinetic isotope effect experiments.....                                                           | 8  |
| Isotope crossover/exchange experiments.....                                                       | 9  |
| Optimization of reaction conditions.....                                                          | 11 |
| Characterization data for iron complexes.....                                                     | 13 |
| General procedure A for propargylic C-H functionalization of alkynes.....                         | 15 |
| Characterization Data for Products 3:.....                                                        | 16 |
| General procedure B for propargylic C-H functionalization of alkenes.....                         | 29 |
| Characterization Data for Products 5:.....                                                        | 29 |
| General procedure C for propargylic C-H functionalization of alkynes.....                         | 32 |
| Characterization data for products 6:.....                                                        | 33 |
| Additional stoichiometric functionalization experiments.....                                      | 38 |
| Synthesis of substrates and characterization data for new compounds:.....                         | 39 |
| The alkyne substrates are list.....                                                               | 39 |
| Reference.....                                                                                    | 43 |
| X-ray structures for products 3ab and 6d.....                                                     | 44 |
| Copies of $^1\text{H}$ and $^{13}\text{C}$ NMR spectra for catalyst, products and substrates..... | 46 |

## General Information:

**General Reagent Information:** Anhydrous tetrahydrofuran, 1,2-dichloroethane, and trifluorotoluene were purchased from Acros (AcroSeal packaging), Sigma Aldrich (Sure/Seal packaging), and Frontier Scientific (J&KSeal packaging), respectively, and were transferred into an argon-filled glovebox and used as received. Other dry solvents were obtained by distillation and storage over 4Å molecular sieves. Triphenylcarbenium tetrafluoroborate ( $\text{Ph}_3\text{C}^+\text{BF}_4^-$ ) was purchased from Alfa Aesar and stored in an argon-filled glove box. All other reagents were purchased from Oakwood, Acros, Alfa Aesar, or Sigma Aldrich and used as received. Compounds were purified by flash column chromatography using SiliCycle *SiliaFlash*® F60 silica gel, unless otherwise indicated.

**General Analytical Information:** New compounds were characterized by  $^1\text{H}$  NMR,  $^{13}\text{C}$  NMR and HRMS. Copies of the  $^1\text{H}$  NMR and  $^{13}\text{C}$  NMR spectra can be found at the end of the Supporting Information.  $^1\text{H}$  and  $^{13}\text{C}$  NMR spectra were recorded on Bruker 400 MHz or 500 MHz instruments. All  $^1\text{H}$  NMR data are reported in  $\delta$  units, parts per million (ppm), and were measured relative to the residual proton signal in the deuterated solvent at 7.26 ppm ( $\text{CDCl}_3$ ) or 5.32 ppm ( $\text{CD}_2\text{Cl}_2$ ). All  $^{13}\text{C}$  NMR spectra are  $^1\text{H}$  decoupled and reported in ppm relative to the solvent signal at 77.16 ppm ( $\text{CDCl}_3$ ) or 53.84 ppm ( $\text{CD}_2\text{Cl}_2$ ). Thin-layer chromatography (TLC) was performed on Silicycle 250  $\mu\text{m}$  (analytical) or 1000  $\mu\text{m}$  (preparative) silica gel plates. Compounds were visualized by irradiation with UV light, or by staining with iodine/silica gel, potassium permanganate, or phosphomolybdic acid (PMA). Yields refer to isolated compounds, unless otherwise indicated. High resolution mass spectra were recorded on a Thermo Scientific Q-Exactive mass spectrometer.

NMR yield was determined by using 1,1,2,2-tetrachloroethane as internal standard for  $^1\text{H}$  spectroscopy and using  $\text{CDCl}_3$  as internal standard for  $^2\text{H}$  spectroscopy.

## Mechanistic experiments

### Stoichiometric experiments for Cp-based complexes.

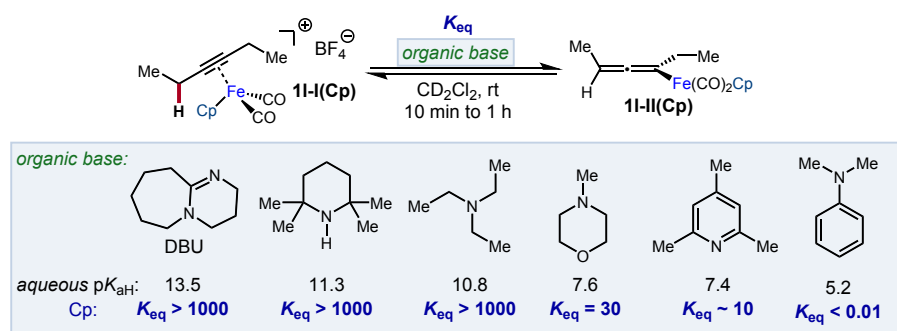

In an argon-filled glovebox, an NMR tube was charged with **1I-I(Cp)** (0.029 mmol, 10 mg) and CD<sub>2</sub>Cl<sub>2</sub> (0.5 mL), then the base (1.0 equiv) was added into the above solution. The NMR tube was capped and removed from the glovebox and shaken by hand. <sup>1</sup>H NMR spectra were then recorded after 5 min, 10 min, 20 min, 30 min, 1 h, and 2 h. The position of the equilibrium was determined by integration of the Cp signal of the cationic and neutral Fp-alkyne complexes. Equilibrium was established within 1 h for all bases examined.

**Note:** The *K<sub>eq</sub>* of *sym*-collidine is not determined because **1I-I(Cp)** was transformed to the by-product for which we have so far not been able to assign a definitive structure.

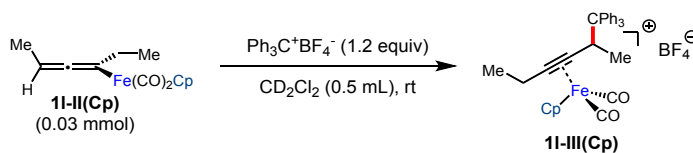

In an argon-filled glovebox, **1I-II(Cp)**, prepared from **1I-I(Cp)** (approx. 0.03 mmol), was dissolved in CD<sub>2</sub>Cl<sub>2</sub> (0.5 mL) and added to an NMR tube charged with Ph<sub>3</sub>C<sup>+</sup>BF<sub>4</sub><sup>-</sup> (12 mg, 1.2 equiv). The NMR tube was capped and removed from the glovebox and shaken by hand. <sup>1</sup>H NMR spectra were acquired after 5 min.

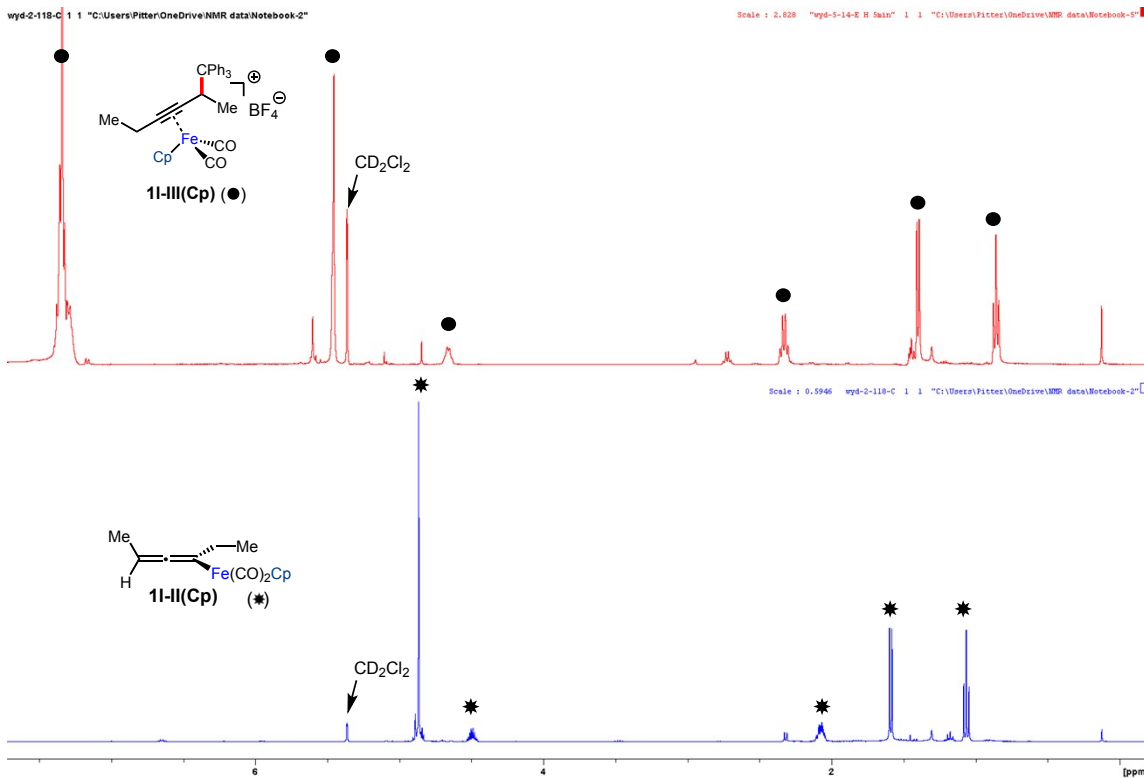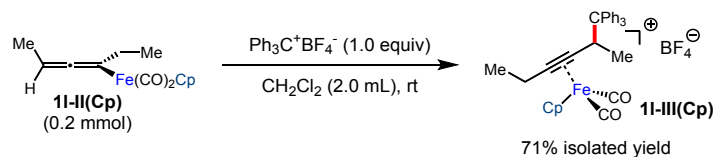

The Fe complex **11-III(Cp)** is stable to collect for  $^1\text{H}$  NMR and HRMS. To a solution of **11-II(Cp)** prepared from above (approx. 0.2 mmol) in dry  $\text{CH}_2\text{Cl}_2$  (2 mL) was added  $\text{Ph}_3\text{C}^+\text{BF}_4^-$  (66 mg, 0.2 mmol, 1.0 equiv.) as a solid in the argon-filled glove box. The mixture was stirred under  $\text{N}_2$  at room temperature for 1.5 h. Then dry diethyl ether (5 mL) was added to the above solution. The desired product precipitated as an orange solid, which was collected on a frit, and further dried *in vacuo* (84 mg, 71% yield).

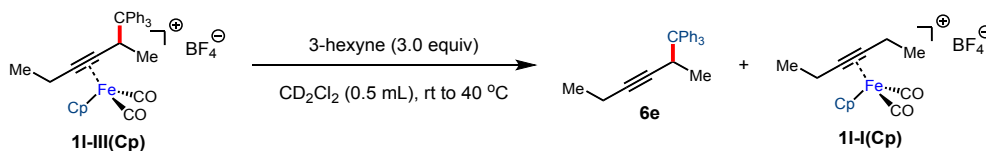

In an argon-filled glovebox, **11-III(Cp)** (0.012 mmol, 7 mg) was added to an NMR tube and dissolved in  $\text{CD}_2\text{Cl}_2$  (0.5 mL). Then 3-hexyne (0.036 mmol, 4  $\mu\text{L}$ , 3 equiv) was added to the above solution. The NMR tube was capped and removed from the glovebox and shaken by hand. A  $^1\text{H}$  NMR spectrum was acquired after 5 min. Then the NMR tube was placed in an oil bath, preheated to 40  $^\circ\text{C}$ , and another spectrum was acquired after 25 min, and then after 12 h. The alkyne exchange with Cp as the supporting ligand was still incomplete (80% conversion) after 12 hours. **11-III(Cp)/6e** or **11-III(Cp)/11-I(Cp)** = 1:4.

An experiment in which 3-hexyne was added directly to an NMR tube containing *in situ* generated **11-III(Cp)** showed largely identical results (80% NMR yield of **6e** after 12 h at 40 °C). The allenyl complex **11-II(Cp)** was observed after addition of Et<sub>3</sub>N.

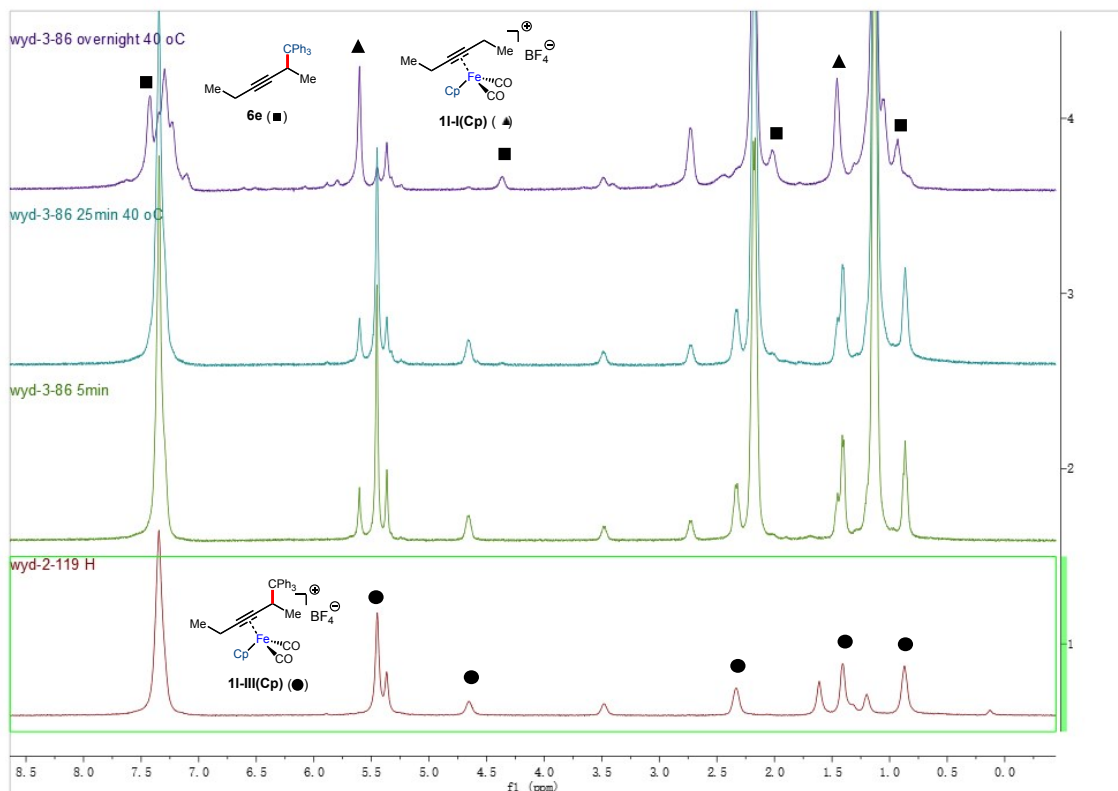

### Stoichiometric experiments for Cp\*-based complexes.

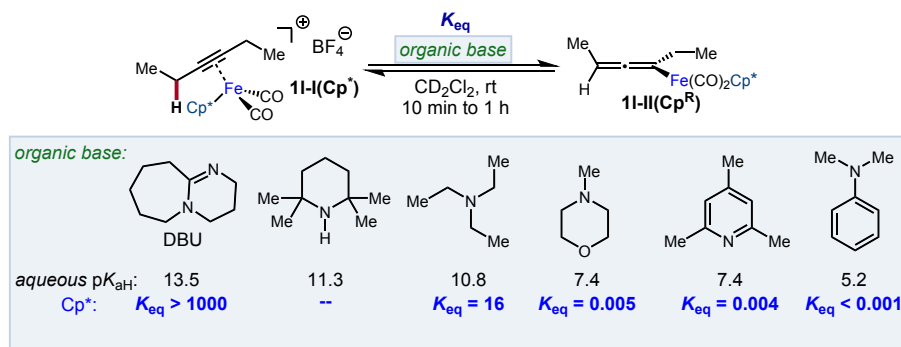

In an argon-filled glovebox, an NMR tube was charged with **11-I(Cp<sup>\*</sup>)** (0.024 mmol, 10 mg) and CD<sub>2</sub>Cl<sub>2</sub> (0.5 mL), then the base (1.0 equiv) was added into the above solution. The NMR tube was capped and removed from the glovebox and shaken by hand. <sup>1</sup>H NMR spectra were then recorded after 5 min, 10 min, 20 min, 30 min, 1 h, and 2 h. The

position of the equilibrium was determined by integration of the Cp signal of the cationic and neutral Fp-alkyne complexes. Equilibrium was established within 2h for all bases examined, except in the case of TMPH.

**NOTE:** The equilibrium constant for the deprotonation of **11-I(Cp\*)** by TMPH could not be determined, as equilibrium was not reached even after 24 h and the NMR sample had started to undergo decomposition.

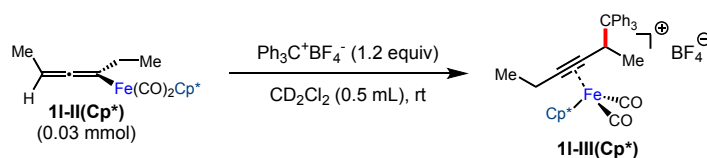

In an argon-filled glovebox, **11-II(Cp\*)** (0.03 mmol) was dissolved in  $\text{CD}_2\text{Cl}_2$  (0.5 mL) and added to an NMR tube containing  $\text{Ph}_3\text{C}^+\text{BF}_4^-$  (12 mg, 1.2 equiv). The NMR tube was removed from the glovebox and shaken by hand.  $^1\text{H}$  NMR spectra were acquired in 5 min. It showed the reaction was done determined by comparing the position of  $\text{CH}_3$  groups in spectrum.

**NOTE:** The Fe complex **11-III(Cp\*)** is not stable and will decompose to the product **6e** slowly.

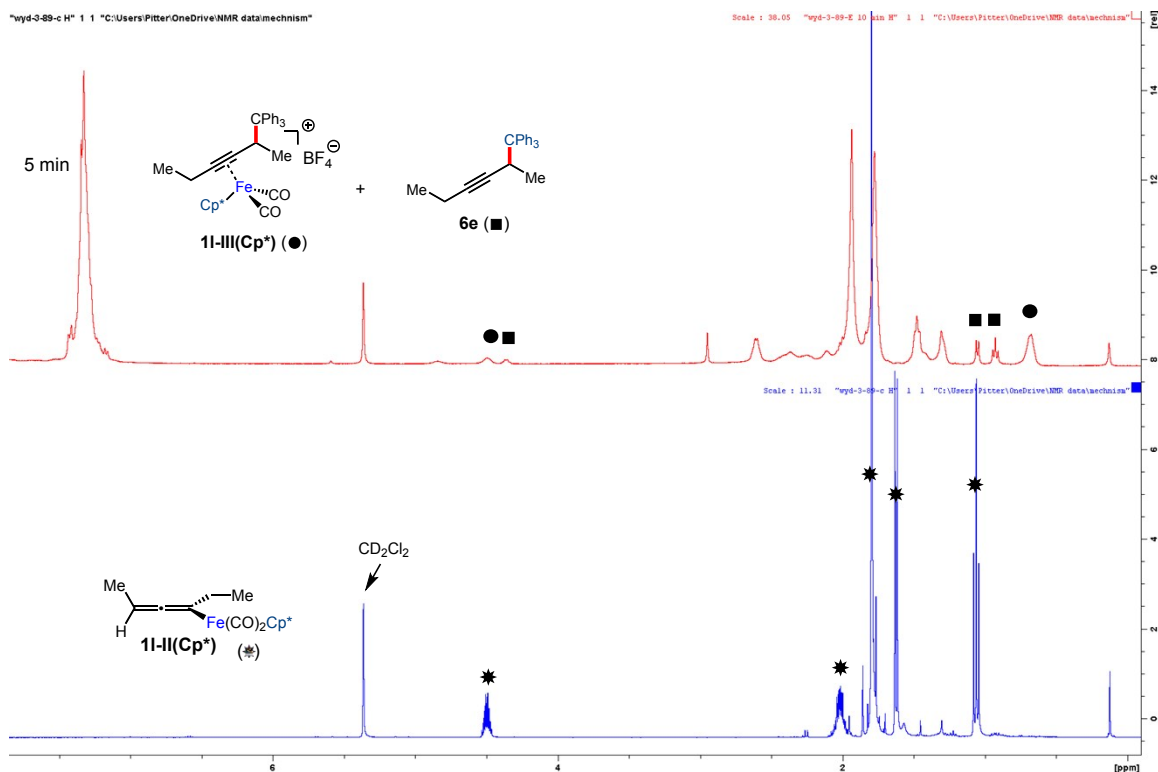

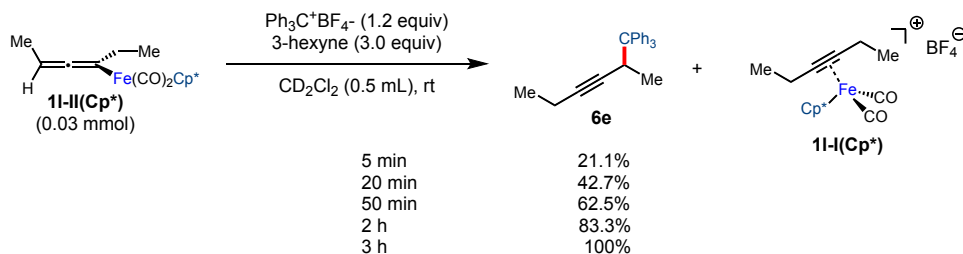

Because of the instability of Fe complex **11-III(Cp\*)**, we conduct the alkyne-exchange experiments in one pot. The procedure is as following:

In an argon-filled glovebox, **11-II(Cp\*)** (0.03 mmol) was dissolved in CD<sub>2</sub>Cl<sub>2</sub> (0.5 mL) and added to an NMR tube containing Ph<sub>3</sub>C<sup>+</sup>BF<sub>4</sub><sup>-</sup> (12 mg, 1.2 equiv) and 3-hexyne (10 μL, 0.09 mmol, 3.0 equiv). The NMR tube was removed from the glovebox and shaken by hand. <sup>1</sup>H NMR spectra were acquired after 5 min, 20 min, 50 min, 2 h and 3 h.

In contrast to the sluggish alkyne exchange for **11-III(Cp)** (incomplete even after 12 h at 40 °C), the exchange of 3-hexyne with **11-III(Cp\*)** took place readily at room temperature, and was complete after 3 h.

These observations are consistent with rapid irreversible functionalization and rate-determining deprotonation observed for the optimized catalytic system.

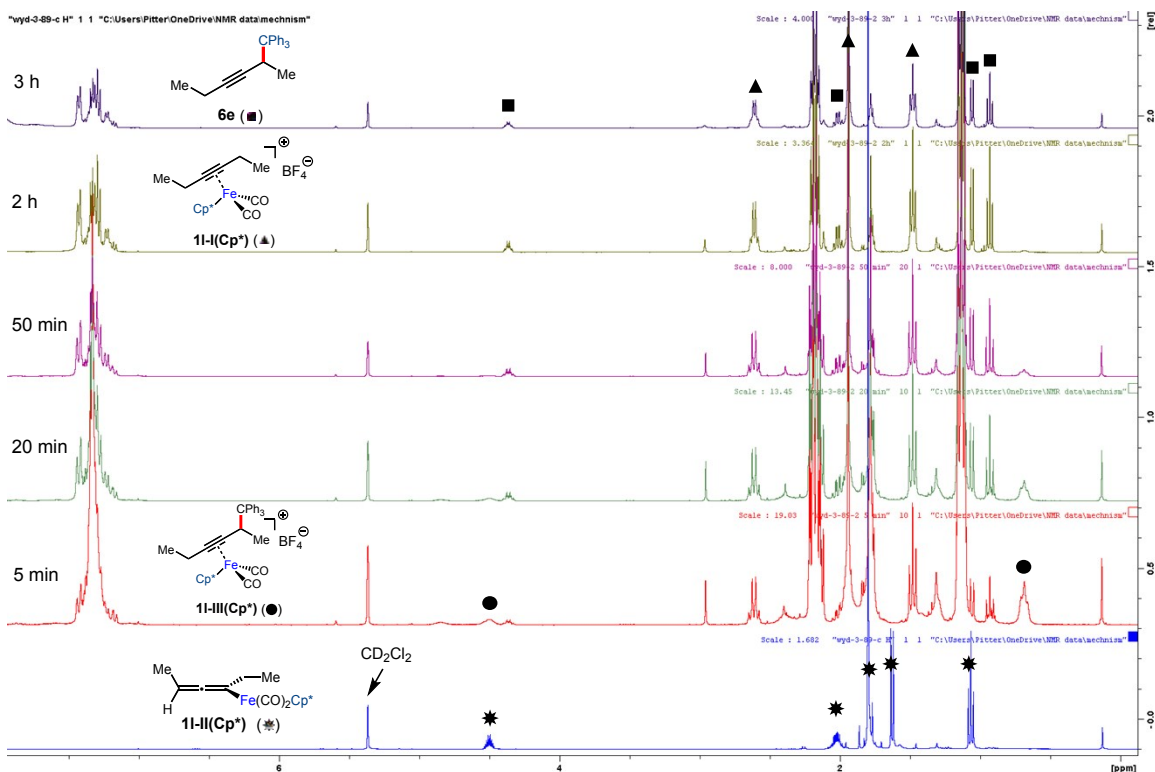

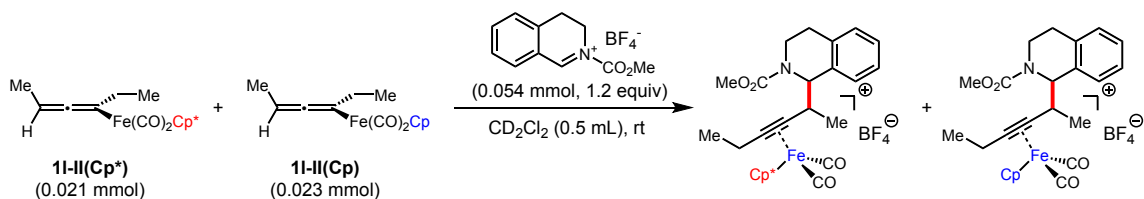

In an argon-filled glovebox, **11-II(Cp<sup>\*</sup>)** (0.021 mmol) and **11-II(Cp)** (0.023 mmol) was dissolved in CD<sub>2</sub>Cl<sub>2</sub> (0.5 mL) and added to an NMR tube containing Ph<sub>3</sub>C<sup>+</sup>BF<sub>4</sub><sup>-</sup> (15 mg, 0.054 mmol, 1.2 equiv). The NMR tube was removed from the glovebox and shaken by hand. <sup>1</sup>H NMR spectra were acquired in 5 min and 10 min. The CH<sub>3</sub> groups of **11-II(Cp<sup>\*</sup>)** and **11-II(Cp)** are well-resolved as doublets in the <sup>1</sup>H spectra. The spectrum of product is complicated because of the presence of rotamers and diastereomers. Thus, we are unable to determine the NMR yield of the products based on the spectrum. However, after 5 min, **11-II(Cp<sup>\*</sup>)** could no longer be observed, while a trace of **11-II(Cp)** remained. After 10 min, **11-II(Cp)** could no longer be observed.

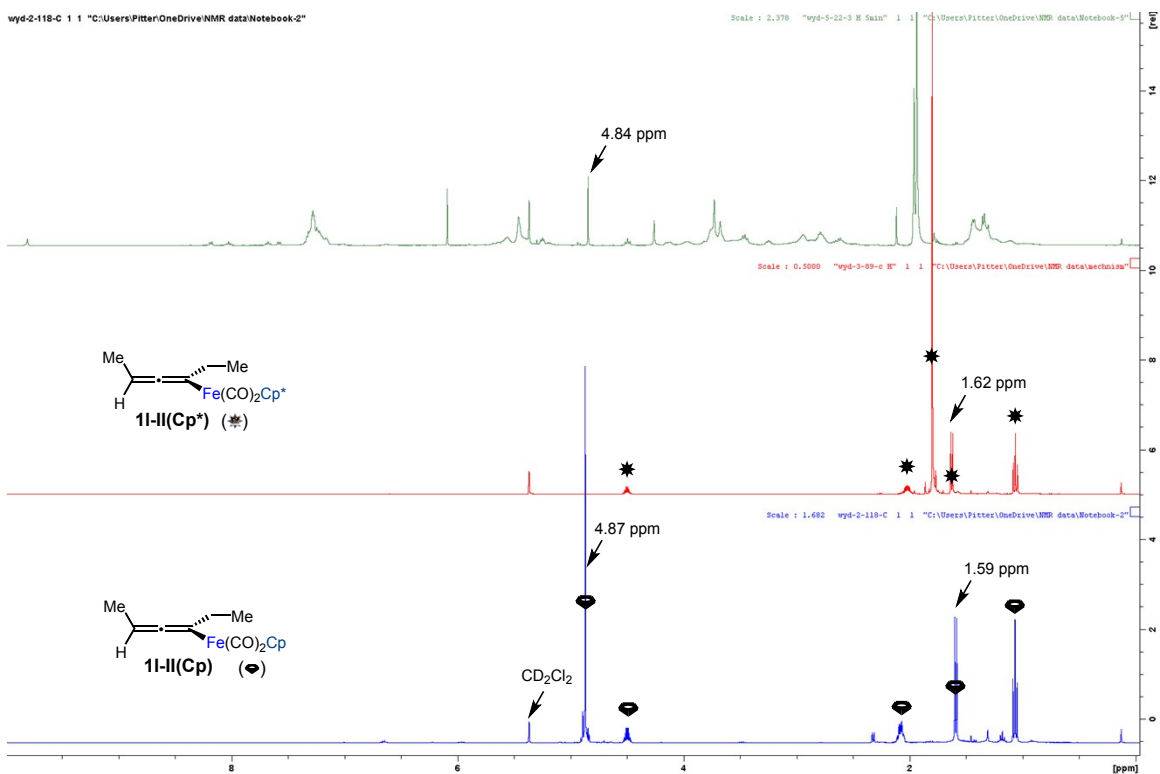

## Kinetic isotope effect experiments



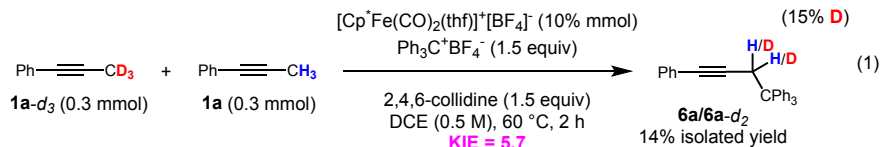

In an argon-filled glovebox,  $\text{Cp}^*\text{Fe}(\text{CO})_2(\text{thf})^+\text{BF}_4^-$  (24.4 mg, 10 mol%),  $\text{Ph}_3\text{C}^+\text{BF}_4^-$  (300 mg, 0.9 mmol, 1.5 equiv), dry 1,2-dichloroethane (1.2 mL), **1a** (39  $\mu\text{L}$ , 0.3 mmol, 1.0 equiv), **1a-d<sub>3</sub>** (36 mg, 0.3 mmol, 1.0 equiv) and 2,4,6-collidine (120  $\mu\text{L}$ , 0.9 mmol, 1.5 equiv) were added to a flame-dried screw-cap reaction tube (13 mm  $\times$  100 mm, Fisherbrand, part # 14-959-35C) in rapid succession. The reaction tube was capped with a Teflon/silicone septum (Thermo/National part # C4015-66A) screw cap and removed from the glovebox. The reaction tube was then placed in an oil bath, preheated to 60  $^\circ\text{C}$ , where it was stirred for 2 h. The crude mixture was concentrated *in vacuo* and purified by flash column chromatography to provide a mixture of **6a** and **6a-d<sub>2</sub>** (20% NMR yield, 85:15 ratio, 31 mg, 14% yield).

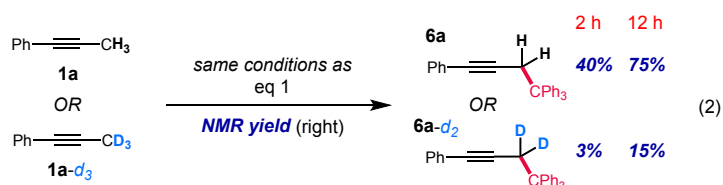

In an argon-filled glovebox,  $\text{Cp}^*\text{Fe}(\text{CO})_2(\text{thf})^+\text{BF}_4^-$  (10 mol %, 12.2 mg),  $\text{Ph}_3\text{C}^+\text{BF}_4^-$  (150 mg, 0.45 mmol, 1.5 equiv), dry 1,2-dichloroethane (0.6 mL), **1a** (39  $\mu\text{L}$ , 0.3 mmol, 1.0 equiv) or **1a-d<sub>3</sub>** (36 mg, 0.3 mmol, 1.0 equiv) and 2,4,6-collidine (60  $\mu\text{L}$ , 0.45 mmol, 1.5 equiv) were added to a flame-dried screw-cap reaction tube (13 mm  $\times$  100 mm, Fisherbrand, part # 14-959-35C) in rapid succession. The reaction tube was capped with a Teflon/silicone septum (Thermo/National part # C4015-66A) screw cap and removed from the glovebox. The reaction tube was then placed in an oil bath, preheated to 60  $^\circ\text{C}$ , where it was stirred for 2 h or 12 h. The NMR yield was then determined by  $^1\text{H}$  and  $^2\text{H}$  NMR spectroscopy. We note that for **1a-d<sub>3</sub>**, the reaction was sluggish and low isolated yield was obtained after 48 h. This is due to formation of the by-product of **1a-d<sub>3</sub>** and deactivation of the catalyst. Hence, absolute rate constant measurements could not be made. Nevertheless, the observation of a primary kinetic isotope effect by competition and by parallel experiments indicates that deprotonation is the turnover-limiting step of the catalytic cycle.

## Isotope crossover/exchange experiments

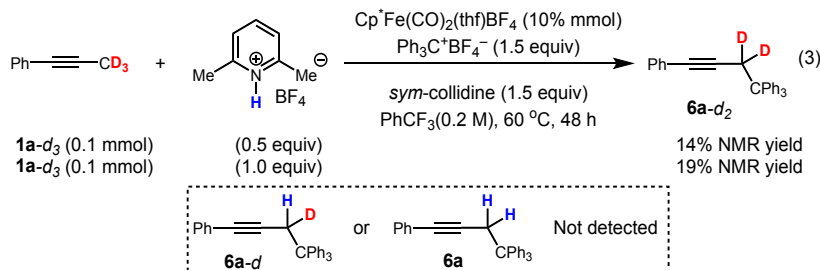

In an argon-filled glovebox,  $\text{Cp}^*\text{Fe}(\text{CO})_2(\text{THF})^+\text{BF}_4^-$  (4.1 mg, 10 mol%),  $\text{Ph}_3\text{C}^+\text{BF}_4^-$  (50 mg, 0.15 mmol, 1.5 equiv), dry trifluorotoluene (0.5 mL), **1a-d<sub>3</sub>** (0.1 mmol, 1.0 equiv) 2,6-lutidinium tetrafluoroborate (0.5 equiv or 1.0 equiv) and 2,4,6-collidine (20  $\mu\text{L}$ , 0.15 mmol, 1.5 equiv) were added in rapid succession. The reaction tube was capped and removed from the glovebox. The reaction tube was then placed in an oil bath, preheated to 60 °C, where it was stirred for 48 h. The crude product was then analyzed by  $^1\text{H}$  and  $^2\text{H}$  NMR spectroscopy. In both cases, only **6a-d<sub>2</sub>** was observed, while **6a-d** and **6a** were not detected. *Note:*  $\text{PhCF}_3$  was instead of 1,2-dichloroethane as the solvent in this experiment because signals for **6a** and DCE both appear around 3.7 ppm.

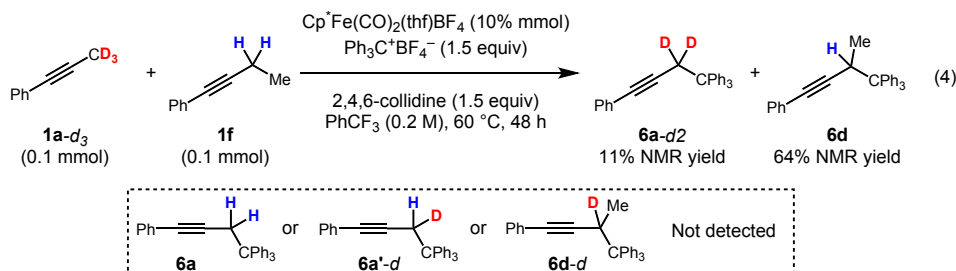

In an argon-filled glovebox,  $\text{Cp}^*\text{Fe}(\text{CO})_2(\text{thf})^+\text{BF}_4^-$  (8.2 mg, 10 mol %),  $\text{Ph}_3\text{C}^+\text{BF}_4^-$  (100 mg, 0.3 mmol, 1.5 equiv.), dry trifluorotoluene (1.0 mL), **1a-d<sub>3</sub>** (0.1 mmol, 1.0 equiv), **1f** (0.1 mmol, 1.0 equiv), and 2,4,6-collidine (40  $\mu\text{L}$ , 0.3 mmol, 1.5 equiv) were added to a screw-cap reaction tube in rapid succession. The reaction tube was capped and removed from the glovebox. The reaction tube was then placed in an oil bath, preheated to 60 °C, where it was stirred for 48 h. After cooling down to room temperature, the internal standard  $\text{CDCl}_3$  was used for  $^2\text{H}$  spectroscopy and the internal standard 1,1,2,2-tetrachloroethane was used for  $^1\text{H}$  spectroscopy. None of the crossover products could be observed by  $^1\text{H}$  or  $^2\text{H}$  NMR spectroscopy. *Note:*  $\text{PhCF}_3$  was instead of 1,2-dichloroethane as the solvent in this experiment because signals for **6a** and DCE both appear around 3.7 ppm.

The above two control experiments indicate that the deprotonation of alkyne is an irreversible process, consistent with the previous result that deprotonation is the turnover-limiting step.

## Optimization of reaction conditions

### 1. Optimization of the protecting group.

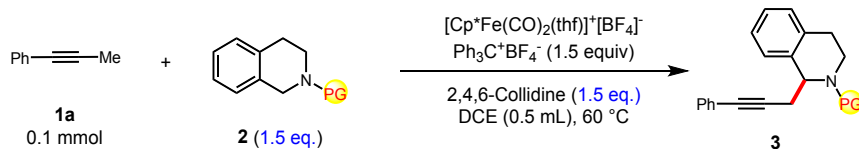

| Entry | PG                     | NMR Yield (%) <sup>b</sup> |
|-------|------------------------|----------------------------|
| 1     | CO <sub>2</sub> Me     | 55                         |
| 2     | CO <sub>2</sub> Bn     | 40                         |
| 3     | Fmoc                   | 43                         |
| 4     | Piv                    | 31                         |
| 5     | P(O)(OEt) <sub>2</sub> | No Product                 |
| 6     | Boc                    | No Product                 |
| 7     | CF <sub>3</sub> C(O)   | No Product                 |

<sup>a</sup> All reactions were carried out with **1a** (0.1 mmol), **2** (1.5 equiv), Ph<sub>3</sub>C<sup>+</sup>BF<sub>4</sub><sup>-</sup> (1.5 equiv), 2,4,6-collidine (1.5 equiv), Cp\*Fe(CO)<sub>2</sub>(thf)BF<sub>4</sub> (30 mol%) and dry DCE (0.5 mL) at 60 °C. <sup>b</sup> NMR yield was determined by using 1,1,2,2-tetrachloroethane as internal standard.

### 2. Optimization of reagent ratio.

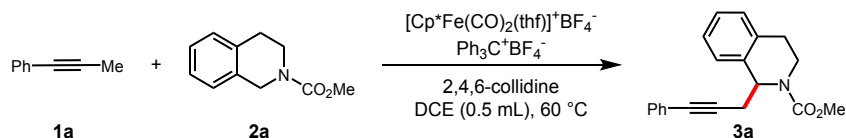

| Entry | <b>1a</b> : <b>2a</b> : Ph <sub>3</sub> CBF <sub>4</sub> : Collidine | NMR Yield (%) <sup>b</sup> |
|-------|----------------------------------------------------------------------|----------------------------|
| 1     | 1.0:1.5:1.5:1.8                                                      | 55                         |
| 2     | 1.0:1.8:1.8:1.5                                                      | No Product                 |
| 3     | 1.0:2.0:2.0:2.5                                                      | 47                         |
| 4     | 1.0:1.5:1.7:1.8                                                      | 62                         |
| 5     | 1.0:1.5:1.5:2.5                                                      | 47                         |
| 6     | 2.0:1.0:1.0:1.0                                                      | 8                          |
| 7     | 2.0:1.0:1.0:1.2                                                      | 29                         |

<sup>a</sup> All reactions were carried out with **1a** (0.1 mmol), **2a** (x equiv), Ph<sub>3</sub>C<sup>+</sup>BF<sub>4</sub><sup>-</sup> (x equiv), 2,4,6-collidine (x equiv), Cp\*Fe(CO)<sub>2</sub>(thf)BF<sub>4</sub> (30 mol%) and dry DCE (0.5 mL) at 60 °C. <sup>b</sup> NMR yield was determined by using 1,1,2,2-tetrachloroethane as internal standard.

### 3. Optimization of the anion.

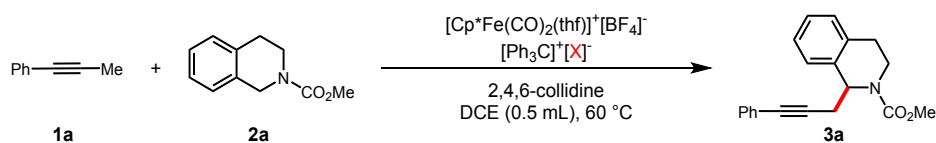

| Entry | $\text{Ph}_3\text{C}^+\text{X}^-$       | NMR Yield (%) <sup>b</sup> |
|-------|-----------------------------------------|----------------------------|
| 1     | $\text{Ph}_3\text{C}^+\text{BF}_4^-$    | 62                         |
| 2     | $\text{Ph}_3\text{C}^+\text{ClO}_4^-$   | 17                         |
| 3     | $\text{Ph}_3\text{CCl} + \text{GaCl}_3$ | No Product                 |
| 4     | $\text{Ph}_3\text{C}^+\text{PF}_6^-$    | trace                      |
| 5     | $\text{Ph}_3\text{C}^+\text{SbCl}_6^-$  | No Product                 |

<sup>a</sup> All reactions were carried out with **1a** (0.1 mmol), **2a** (1.5 equiv),  $\text{Ph}_3\text{C}^+\text{X}^-$  (1.7 equiv), 2,4,6-collidine (1.8 equiv),  $\text{Cp}^*\text{Fe}(\text{CO})_2(\text{thf})\text{BF}_4$  (30 mol%) and dry DCE (0.5 mL) at 60 °C. <sup>b</sup> NMR yield was determined by using 1,1,2,2-tetrachloroethane as internal standard.

### 4. Optimization of solvent and catalyst loading.

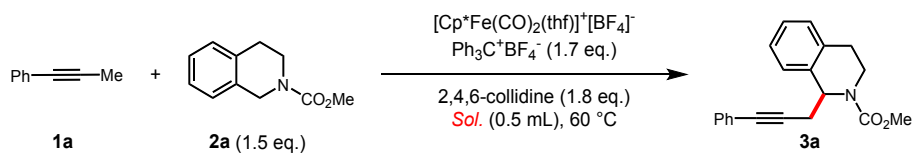

| Entry | Loading of [Fe] (%) | Solvents                         | NMR Yield (%) <sup>b</sup> |
|-------|---------------------|----------------------------------|----------------------------|
| 1     | 30                  | DCE                              | 62                         |
| 2     | 30                  | $\text{CHCl}_3$                  | 60                         |
| 3     | 30                  | $\text{C}_6\text{H}_4\text{F}_2$ | 70                         |
| 4     | 30                  | PhCl                             | 76                         |
| 5     | 30                  | <i>t</i> -BuOMe                  | No Product                 |
| 6     | 30                  | $\text{PhCF}_3$                  | 83                         |
| 7     | 20                  | $\text{PhCF}_3$                  | 77                         |
| 8     | 10                  | $\text{PhCF}_3$                  | 56                         |

<sup>a</sup> All reactions were carried out with **1a** (0.1 mmol), **2a** (1.5 equiv),  $\text{Ph}_3\text{C}^+\text{BF}_4^-$  (1.7 equiv), 2,4,6-collidine (1.8 equiv),  $\text{Cp}^*\text{Fe}(\text{CO})_2(\text{thf})\text{BF}_4$  (x mol%) and dry solvent (0.5 mL) at 60 °C. <sup>b</sup> NMR yield was determined by using 1,1,2,2-tetrachloroethane as internal standard.

## 5. Optimization of the temperature.<sup>a</sup>

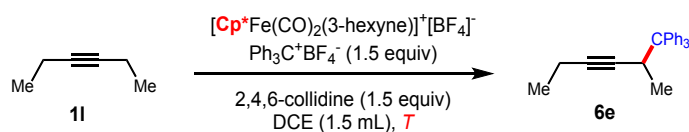

| Entry | <i>T</i> (°C) | NMR Yield (%) <sup>b</sup> |
|-------|---------------|----------------------------|
| 1     | 25            | 12                         |
| 2     | 40            | 28                         |
| 3     | 60            | 43                         |
| 4     | 80            | 38                         |

<sup>a</sup> All reactions were carried out with **11** (0.1 mmol), Ph<sub>3</sub>C<sup>+</sup>BF<sub>4</sub><sup>-</sup> (1.5 equiv), 2,4,6-collidine (1.5 equiv), Cp\*Fe(CO)<sub>2</sub>(3-hexyne)<sup>+</sup>BF<sub>4</sub><sup>-</sup> (10 mol%) and dry DCE (0.5 mL). <sup>b</sup> NMR yield was determined by using 1,1,2,2-tetrachloroethane as internal standard.

## Characterization data for iron complexes.

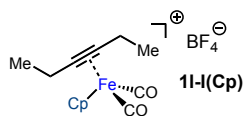

Dicarbonylcyclopentadienyliron(II)-alkyne complex **11-I(Cp)** was synthesized according to a modification of a literature procedure<sup>1</sup>.

Under N<sub>2</sub>, a solution of 3-hexyne (1.71 mL, 15 mmol, 3.0 equiv) in dry toluene (50 mL) was added to a 100 mL flame-dried round-bottom flask, charged with CpFe(CO)<sub>2</sub>I (1.52 g, 5 mmol, 1.0 equiv), AgBF<sub>4</sub> (1.0 g, ~5 mmol, 1.0 equiv), and a stir bar. The obtained suspension was stirred at 50 °C for 2-3 h. Subsequently, the reaction mixture was allowed to cool to room temperature and filtered through a pad of Celite. The filter cake was rinsed with CH<sub>2</sub>Cl<sub>2</sub> until the filtrate turned colorless. The desired iron complex **11-I(Cp)** was collected as yellow solid (1.68 g, 98%) upon concentration *in vacuo*.

<sup>1</sup>H NMR (500 MHz, CDCl<sub>3</sub>) δ 5.64 (br s, 5H), 2.71 (br s, 4H), 1.39 (br s, 6H).

<sup>13</sup>C NMR (125 MHz, CDCl<sub>3</sub>) δ 207.9, 89.3, 50.3, 20.1, 15.2.

<sup>19</sup>F NMR (470 MHz, CDCl<sub>3</sub>) δ -151.3.

HRMS (ESI) calcd for C<sub>13</sub>H<sub>15</sub>O<sub>2</sub>Fe [M-BF<sub>4</sub>]<sup>+</sup>: 259.0416, found: 259.0424.

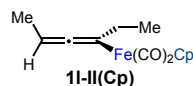

To a solution of **11-I(Cp)** (69 mg, 0.2 mmol) in dry CH<sub>2</sub>Cl<sub>2</sub> (2 mL) was added triethylamine (28 μL, 1.0 equiv.) under N<sub>2</sub>. The mixture was stirred at room temperature

for 0.5 h. The solvent was removed under reduced pressure, and the residue was extracted with dry ether and filtered through Celite to remove the insoluble triethylammonium tetrafluoroborate. The filtrate was concentrated to give the crude product **11-II(Cp)** as a yellow oil. The major peaks of the  $^1\text{H}$  NMR spectrum could be assigned,<sup>2</sup> but an analytically pure sample of **11-II(Cp)** could not be obtained.

$^1\text{H}$  NMR (400 MHz,  $\text{CD}_2\text{Cl}_2$ )  $\delta$  4.80 (s, 5H), 4.50–4.35 (m, 1H), 2.10–1.90 (m, 2H), 1.52 (d,  $J = 6.4$  Hz, 3H), 1.00 (t,  $J = 6.8$  Hz, 3H).

$^{13}\text{C}$  NMR (100 MHz,  $\text{CD}_2\text{Cl}_2$ )  $\delta$  216.5, 216.3, 199.5, 85.8, 84.6, 75.4, 36.1, 15.1, 15.0.

HRMS (ESI) calcd for  $\text{C}_{13}\text{H}_{15}\text{O}_2\text{Fe}$  [ $\text{M}+\text{H}$ ] $^+$ : 259.0416, found: 259.0419.

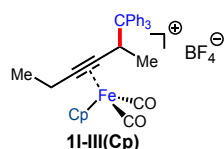

To a solution of **11-II(Cp)** prepared from above (approx. 0.2 mmol) in dry  $\text{CH}_2\text{Cl}_2$  (2 mL) was added  $\text{Ph}_3\text{C}^+\text{BF}_4^-$  (66 mg, 0.2 mmol, 1.0 equiv.) as a solid in the argon-filled glove box. The mixture was stirred under  $\text{N}_2$  at room temperature for 1 h. Then dry ether (5 mL) was added to the above solution. The desired product precipitated as an orange solid, which was collected on a frit, and further dried *in vacuo* (84 mg, 71% yield).

$^1\text{H}$  NMR (400 MHz,  $\text{CD}_2\text{Cl}_2$ )  $\delta$  7.35 (s, 15H), 5.45 (s, 5H), 4.65 (s, 1H), 2.33 (s, 2H), 1.41 (s, 3H), 0.87 (s, 3H).

HRMS (ESI) calcd for  $\text{C}_{32}\text{H}_{29}\text{O}_2\text{Fe}$  [ $\text{M}-\text{BF}_4^-$ ] $^+$ : 501.1511, found: 501.1501.

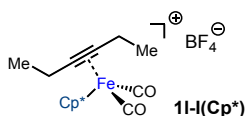

Dicarbonylpentamethylcyclopentadienyliron(II)-alkyne complex **11-I(Cp\*)** was synthesized according to a modification of a literature procedure<sup>1</sup>.

Under  $\text{N}_2$ , a solution of 3-hexyne (0.7 mL, 6 mmol, 3.0 equiv) in dry toluene (20 mL) was added to a 50 mL flame-dried round-bottom flask, charged with  $\text{Cp}^*\text{Fe}(\text{CO})_2\text{I}$  (748 mg, 2 mmol),  $\text{AgBF}_4$  (400 mg, ~2 mmol), and a stir bar. The obtained suspension was stirred at 50 °C for 2–3 h. Subsequently, the reaction mixture was allowed to cool to room temperature and filtered through a pad of Celite. The filter cake was rinsed with  $\text{CH}_2\text{Cl}_2$  until the filtrate turned colorless. The desired iron complex **11-I(Cp\*)** was collected as brown solid (776 mg, 93%) upon concentration *in vacuo*.

$^1\text{H}$  NMR (500 MHz,  $\text{CDCl}_3$ )  $\delta$  2.56 (q,  $J = 7.0$  Hz, 4H), 1.89 (s, 15H), 1.42 (t,  $J = 7.0$  Hz, 6H).

$^{13}\text{C}$  NMR (125 MHz,  $\text{CDCl}_3$ )  $\delta$  211.1, 102.4, 60.3, 18.8, 16.1, 9.5.

$^{19}\text{F}$  NMR (470 MHz,  $\text{CDCl}_3$ )  $\delta$  -153.4.

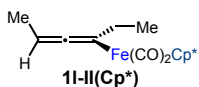

To a solution of **11-I(Cp\*)** (12.5 mg, 0.03 mmol) in dry CH<sub>2</sub>Cl<sub>2</sub> (0.5 mL) was added triethylamine (4 μL, 1.0 equiv.) under N<sub>2</sub>. The mixture was stirred at room temperature for 0.5 h. The solvent was removed under reduced pressure, and the residue was extracted with dry ether, filtered through Celite to remove the insoluble triethylammonium tetrafluoroborate. The filtrate was concentrated to give the crude product **11-II(Cp\*)** as a yellow oil.

<sup>1</sup>H NMR (400 MHz, CD<sub>2</sub>Cl<sub>2</sub>) δ 4.56-4.43 (m, 1H), 2.10-1.97 (m, 2H), 1.80 (s, 15H), 1.63 (d, *J* = 6.8 Hz, 3H), 1.06 (t, *J* = 7.2 Hz, 3H).

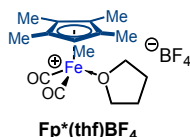

The precatalyst was synthesized according to a modification of literature procedures.<sup>3,4</sup>

A mixture of (η<sup>5</sup>-C<sub>5</sub>Me<sub>5</sub>)Fe(CO)<sub>2</sub>I (1.53 g, 4 mmol) and AgBF<sub>4</sub> (800 mg, ~4.0 mmol) was stirred in THF (22 mL) overnight under N<sub>2</sub>. The solvent was removed *in vacuo*, the residue was extracted with CH<sub>2</sub>Cl<sub>2</sub>, and the solution was filtered through Celite to remove AgI, and the filter cake was washed with CH<sub>2</sub>Cl<sub>2</sub> until the filtrate became colorless. The filtrate was concentrated to 10 mL and diethyl ether (Et<sub>2</sub>O) was added to precipitate the product as a red crystalline solid. After cooling the mixture at -20 °C for 2 h, the crystals were collected, washed with Et<sub>2</sub>O, and dried *in vacuo* to give red crystals **Fp\*(thf)BF<sub>4</sub>** (1.47 g, 91% yield).

<sup>1</sup>H NMR (400 MHz, CD<sub>2</sub>Cl<sub>2</sub>) δ 3.42 (t, *J* = 6.4 Hz, 4H), 1.88-1.82 (m, 4H), 1.77 (s, 15H).

<sup>13</sup>C NMR (100 MHz, CD<sub>2</sub>Cl<sub>2</sub>) δ 210.8, 98.5, 80.8, 26.2, 9.4.

<sup>19</sup>F NMR (376 MHz, CD<sub>2</sub>Cl<sub>2</sub>) δ -152.1.

The spectroscopic data were identical in all respects to those previously reported.<sup>4</sup>

**HRMS** (ESI) calcd for C<sub>14</sub>H<sub>18</sub>O<sub>2</sub>NFe [M - C<sub>4</sub>H<sub>8</sub>O + C<sub>2</sub>H<sub>3</sub>N - BF<sub>4</sub><sup>-</sup>]<sup>+</sup>: 288.0681, found: 288.0683.

## General procedure A for propargylic C-H functionalization of alkynes.

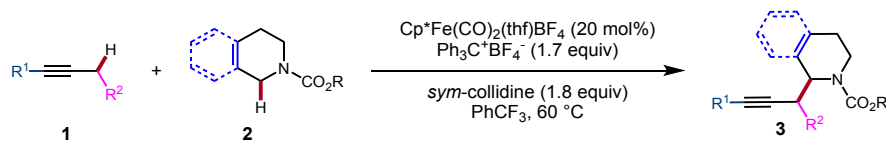

A reaction tube (13 mm × 100 mm, Fisherbrand, part # 14-959-35C) equipped with a

magnetic stir bar was capped with a Teflon/silicone septum (Thermo/National part # C4015-66A) screw cap and flame dried under vacuum. The reaction tube was cooled under argon and transferred into a nitrogen-filled glovebox. In the glovebox, the suspension of carbamate (**2**, 0.45 mmol, 1.5 equiv) and  $\text{Ph}_3\text{C}^+\text{BF}_4^-$  (168 mg, 0.51 mmol, 1.7 equiv) in dry trifluorotoluene (1 mL) was stirred at room temperature for 3 hours to generate the iminium salt. Then  $[\text{Cp}^*\text{Fe}(\text{CO})_2(\text{thf})]^+[\text{BF}_4]^-$  (20 mol%, 24.6 mg), alkyne **1** (0.3 mmol, 1.0 equiv), trifluorotoluene (0.5 mL) and *sym*-collidine (72  $\mu\text{L}$ , 0.54 mmol, 1.8 equiv) were added in rapid succession. The reaction tube was capped and removed from the glovebox. The reaction tube was placed in an oil bath, preheated to 60 °C, where it was stirred for 48 h. After completion of the reaction, the reaction mixture was cooled to room temperature. The crude mixture was concentrated in vacuo and purified by flash column chromatography to provide the desired product **3**.

### Characterization Data for Products **3**:

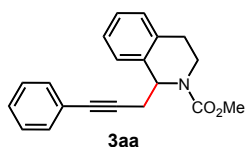

#### Methyl 1-(3-phenylprop-2-yn-1-yl)-3,4-dihydroisoquinoline-2(1H)-carboxylate (**3aa**):

Prepared following general procedure A, using prop-1-yn-1-ylbenzene (**1a**, 39  $\mu\text{L}$ , 0.3 mmol, 1.0 equiv) and methyl 3,4-dihydroisoquinoline-2(1H)-carboxylate (**2a**, 86.1 mg, 0.45 mmol, 1.5 equiv). The crude residue was purified by flash column chromatography, eluting with pure DCM to provide the product **3aa** as a colorless oil (66 mg, 72% yield).

$^1\text{H NMR}$  (500 MHz,  $\text{CDCl}_3$ , rotamers seen)  $\delta$  7.31-7.21 (m, 2H), 7.21-7.15 (m, 4H), 7.15-7.09 (m, 2H), 7.09-7.01 (m, 1H), 5.33 (t,  $J = 6.0$  Hz, 0.5H), 5.26 (t,  $J = 6.5$  Hz, 0.5H), 4.20-4.10 (m, 0.5H), 3.94-3.81 (m, 0.5H), 3.67 (s, 1.5H), 3.66 (s, 1.5H), 3.61-3.49 (m, 0.5H), 3.46-3.34 (m, 0.5H), 2.97-2.68 (m, 4H).

$^{13}\text{C NMR}$  (125 MHz,  $\text{CDCl}_3$ , rotamers seen)  $\delta$  156.0, 135.7, 135.5, 134.42, 134.37, 131.4, 129.0, 128.5, 128.2, 128.1, 127.8, 127.6, 127.4, 127.1, 127.0, 126.2, 126.1, 123.6, 123.4, 86.8, 86.5, 82.9, 53.7, 52.73, 52.67, 39.3, 38.2, 28.7, 28.4, 27.5, 27.2.

**HRMS** (ASAP) calcd for  $\text{C}_{20}\text{H}_{20}\text{O}_2\text{N}$   $[\text{M}+\text{H}]^+$ : 306.1494, found: 306.1480.

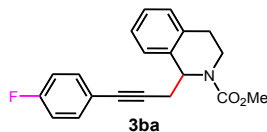

**Methyl 1-(3-(4-fluorophenyl)prop-2-yn-1-yl)-3,4-dihydroisoquinoline-2(1H)-carboxylate (**3ba**):** Prepared following general procedure A, using 1-fluoro-4-(prop-1-



yn-1-yl)benzene (**1b**, 40.2 mg, 0.3 mmol, 1.0 equiv) and methyl 3,4-dihydroisoquinoline-2(1H)-carboxylate (**2a**, 86.1 mg, 0.45 mmol, 1.5 equiv). The crude residue was purified by flash column chromatography, eluting with pure DCM to provide the product **3ba** as a colorless oil (64 mg, 66% yield).

**<sup>1</sup>H NMR** (500 MHz, CDCl<sub>3</sub>, rotamers seen) δ 7.38-7.18 (m, 5H), 7.18-7.10 (m, 1H), 7.02-6.96 (q, *J* = 8.5 Hz, 2H), 5.41 (t, *J* = 6.0 Hz, 0.5H), 5.33 (t, *J* = 6.5 Hz, 0.5H), 4.30-4.18 (m, 0.5H), 4.05-3.91 (m, 0.5H), 3.75 (s, 1.5H), 3.74 (s, 1.5H), 3.66-3.56 (m, 0.5H), 3.52-3.40 (m, 0.5H), 3.05-2.73 (m, 4H).

**<sup>19</sup>F NMR** (470 MHz, CDCl<sub>3</sub>, rotamers seen) δ -111.6, -111.9.

**<sup>13</sup>C NMR** (125 MHz, CDCl<sub>3</sub>, rotamers seen) δ 163.2, 163.1, 161.2, 161.1, 156.1, 135.6, 135.5, 134.4, 134.3, 133.3, 133.2, 131.4, 129.0, 128.5, 127.3, 127.1, 127.0, 126.2, 126.1, 119.7, 119.5, 115.5, 115.4, 115.3, 115.2, 86.5, 86.1, 81.83, 81.77, 53.7, 53.6, 52.73, 52.68, 39.2, 38.2, 28.7, 28.4, 27.5, 27.1 (the <sup>13</sup>C spectrum is too complicated to distinguish the C-F coupling);

**HRMS** (ESI) calcd for C<sub>20</sub>H<sub>19</sub>O<sub>2</sub>NF [M+H]<sup>+</sup>: 324.1394, found: 324.1408.

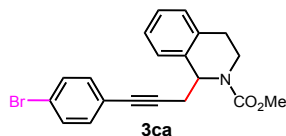

**Methyl 1-(3-(4-bromophenyl)prop-2-yn-1-yl)-3,4-dihydroisoquinoline-2(1H)-carboxylate (**3ca**):** Prepared following general procedure A, using 1-bromo-4-(prop-1-yn-1-yl)benzene (**1c**, 58.2 mg, 0.3 mmol, 1.0 equiv) and methyl 3,4-dihydroisoquinoline-2(1H)-carboxylate (**2a**, 86.1 mg, 0.45 mmol, 1.5 equiv). The crude residue was purified by flash column chromatography, eluting with pure DCM to provide the product **3ca** as a brown oil (65 mg, 56% yield).

**<sup>1</sup>H NMR** (500 MHz, CDCl<sub>3</sub>, rotamers seen) δ 7.48-7.36 (m, 2H), 7.32-7.08 (m, 6H), 5.44 (t, *J* = 6.0 Hz, 0.5H), 5.36 (t, *J* = 6.0 Hz, 0.5H), 4.32-4.20 (m, 0.5H), 4.03-3.93 (m, 0.5H), 3.78 (s, 1.5H), 3.76 (s, 1.5H), 3.68-3.56 (m, 0.5H), 3.54-3.40 (m, 0.5H), 3.07-2.75 (m, 4H).

**<sup>13</sup>C NMR** (125 MHz, CDCl<sub>3</sub>, rotamers seen) δ 156.1, 135.6, 135.5, 134.5, 134.4, 133.0, 131.5, 131.4, 129.1, 128.6, 127.4, 127.2, 127.12, 127.08, 126.3, 126.2, 122.6, 122.4, 122.0, 121.9, 88.2, 87.9, 82.0, 81.9, 53.7, 53.6, 52.81, 52.77, 39.3, 38.2, 28.7, 28.4, 27.6, 27.3.

**HRMS** (ESI) calcd for C<sub>20</sub>H<sub>19</sub>O<sub>2</sub>NBr [M+H]<sup>+</sup>: 384.0594, found: 384.0612.

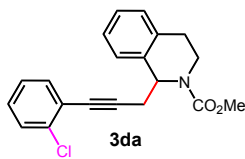

**Methyl 1-(3-(2-chlorophenyl)prop-2-yn-1-yl)-3,4-dihydroisoquinoline-2(1H)-**

**carboxylate (3da):** Prepared following general procedure A, using 1-chloro-2-(prop-1-yn-1-yl)benzene (**1d**, 45 mg, 0.3 mmol, 1.0 equiv) and methyl 3,4-dihydroisoquinoline-2(1H)-carboxylate (**2a**, 86.1 mg, 0.45 mmol, 1.5 equiv). The crude residue was purified by flash column chromatography, eluting with pure DCM to provide the product **3da** as a colorless oil (65 mg, 64% yield).

**<sup>1</sup>H NMR** (500 MHz, CDCl<sub>3</sub>, rotamers seen)  $\delta$  7.45-7.27 (m, 3H), 7.25-7.10 (m, 5H), 5.44 (t,  $J$  = 5.5 Hz, 0.5H), 5.37 (t,  $J$  = 6.0 Hz, 0.5H), 4.33-4.19 (m, 0.5H), 4.06-3.93 (m, 0.5H), 3.754 (s, 1.5H), 3.749 (s, 1.5H), 3.70-3.64 (m, 0.5H), 3.56-3.43 (m, 0.5H), 3.12-2.75 (m, 4H).

**<sup>13</sup>C NMR** (125 MHz, CDCl<sub>3</sub>, rotamers seen)  $\delta$  156.0, 135.6, 135.5, 135.4, 134.5, 134.4, 133.4, 129.1, 129.02, 128.99, 128.8, 128.64, 128.58, 127.4, 127.1, 127.0, 126.3, 126.23, 126.17, 123.4, 123.3, 92.3, 92.0, 79.7, 53.5, 52.73, 52.67, 39.2, 38.2, 28.7, 28.4, 27.8, 27.3.

**HRMS** (ESI) calcd for C<sub>20</sub>H<sub>19</sub>O<sub>2</sub>NCl [M+H]<sup>+</sup>: 340.1099, found: 340.1109.

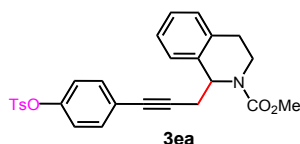

**Methyl 1-(3-(4-(tosyloxy)phenyl)prop-2-yn-1-yl)-3,4-dihydroisoquinoline-2(1H)-carboxylate (3ea):** Prepared following general procedure A, using 4-(prop-1-yn-1-yl)phenyl 4-methylbenzenesulfonate (**1e**, 86 mg, 0.3 mmol, 1.0 equiv) and methyl 3,4-dihydroisoquinoline-2(1H)-carboxylate (**2a**, 86.1 mg, 0.45 mmol, 1.5 equiv). The crude residue was purified by flash column chromatography, eluting with 30% ethyl acetate in hexanes to provide the product **3ea** as a colorless oil (79 mg, 55% yield).

**<sup>1</sup>H NMR** (500 MHz, CDCl<sub>3</sub>, rotamers seen)  $\delta$  7.71 (d,  $J$  = 8.0 Hz, 2H), 7.32 (d,  $J$  = 8.0 Hz, 2H), 7.30-7.13 (m, 6H), 6.91 (t,  $J$  = 8.5 Hz, 2H), 5.42 (t,  $J$  = 6.5 Hz, 0.5H), 5.37 (t,  $J$  = 6.5 Hz, 0.5H), 4.31-4.18 (m, 0.5H), 4.03-3.93 (m, 0.5H), 3.76 (s, 1.5H), 3.75 (s, 1.5H), 3.67-3.55 (m, 0.5H), 3.53-3.41 (m, 0.5H), 3.07-2.80 (m, 4H), 2.47 (s, 3H).

**<sup>13</sup>C NMR** (125 MHz, CDCl<sub>3</sub>, rotamers seen)  $\delta$  156.0, 148.9, 148.8, 145.5, 135.6, 135.4, 134.41, 134.35, 132.7, 132.2, 129.8, 129.0, 128.6, 128.5, 127.3, 127.2, 127.1, 127.0, 126.22, 126.18, 122.4, 122.3, 88.1, 87.7, 81.6, 53.7, 53.6, 52.7, 39.2, 38.2, 28.7, 28.4, 27.5, 27.2, 21.7.

**HRMS** (ESI) calcd for C<sub>27</sub>H<sub>26</sub>O<sub>5</sub>NS [M+H]<sup>+</sup>: 476.1526, found: 476.1535.

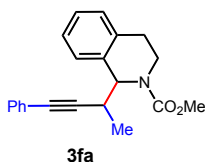

**Methyl 1-(4-phenylbut-3-yn-2-yl)-3,4-dihydroisoquinoline-2(1H)-carboxylate (3fa):** Prepared following general procedure A, using but-1-yn-1-ylbenzene (**1f**, 42  $\mu$ L, 0.3

mmol, 1.0 equiv) and methyl 3,4-dihydroisoquinoline-2(1H)-carboxylate (**2a**, 86.1 mg, 0.45 mmol, 1.5 equiv). The crude residue was purified by flash column chromatography, eluting with pure DCM to provide the product **3fa** as a colorless oil (64 mg, 67% yield, 1:1 d.r.). The d.r. value was detected by crude NMR. The diastereoisomer could not be separated by column.

**<sup>1</sup>H NMR** (500 MHz, CDCl<sub>3</sub>, rotamers and diastereoisomer seen) δ 7.42-7.00 (m, 9H), 5.24 (d, *J* = 5.5 Hz, 0.25H), 5.11-5.02 (m, 0.5 H), 4.97 (d, *J* = 8.0 Hz, 0.25H), 4.18-4.08 (m, 0.25H), 4.06-3.98 (m, 0.25H), 3.98-3.91 (m, 0.25H), 3.90-3.81 (m, 0.25H), 3.81-3.71 (m, 0.25H), 3.73-3.61 (m, 0.25H), 3.66 (s, 1.5H), 3.65 (s, 0.75H), 3.64 (s, 0.75H), 3.59-3.51 (m, 0.25H), 3.42-3.33 (m, 0.25H), 3.25-2.65 (m, 3H), 1.38-1.22 (m, 3H).

**<sup>13</sup>C NMR** (125 MHz, CDCl<sub>3</sub>, rotamers and diastereoisomer seen) δ 156.8, 156.5, 156.4, 135.7, 135.4, 135.2, 134.8, 134.64, 134.56, 134.4, 131.4, 129.0, 128.9, 128.72, 128.67, 128.3, 128.2, 128.1, 128.0, 127., 127.83, 127.7, 127.6, 127.4, 127.3, 127.23, 127.18, 126.9, 126.1, 125.9, 125.5, 125.4, 92.1, 92.0, 91.5, 83.8, 83.5, 83.3, 83.2, 59.4, 58.9, 58.2, 57.9, 52.8, 52.7, 39.8, 39.5, 39.0, 38.8, 33.9, 33.2, 28.4, 28.2, 28.0, 27.8, 18.8, 18.6, 18.3, 18.1.

**HRMS** (ESI) calcd for C<sub>21</sub>H<sub>22</sub>NO<sub>2</sub> [M+H]<sup>+</sup>: 320.1645, found: 320.1653.

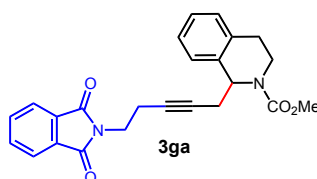

**Methyl 1-(5-(1,3-dioxoisoindolin-2-yl)pent-2-yn-1-yl)-3,4-dihydroisoquinoline-2(1H)-carboxylate (**3ga**):** Prepared following general procedure A, using 2-(pent-3-yn-1-yl)isoindoline-1,3-dione (**1g**, 64 mg, 0.3 mmol, 1.0 equiv) and methyl 3,4-dihydroisoquinoline-2(1H)-carboxylate (**2a**, 86.1 mg, 0.45 mmol, 1.5 equiv). The crude residue was purified by flash column chromatography, eluting with 20% ethyl acetate in hexane to provide the product **3ga** as a colorless oil (74 mg, 61% yield).

**<sup>1</sup>H NMR** (400 MHz, CDCl<sub>3</sub>, rotamers seen) δ 7.91-7.77 (m, 2H), 7.77-7.62 (m, 2H), 7.20-7.00 (m, 4H), 5.22 (t, *J* = 6.0 Hz, 0.5H), 5.12 (t, *J* = 6.0 Hz, 0.5H), 4.16-4.02 (m, 0.5H), 3.91-3.82 (m, 0.5H), 3.81-3.73 (m, 2H), 3.71 (s, 1.5H), 3.70 (s, 1.5H), 3.54-3.40 (m, 0.5H), 3.40-3.25 (m, 0.5H), 3.05-2.73 (m, 2H), 2.73-2.40 (m, 4H).

**<sup>13</sup>C NMR** (100 MHz, CDCl<sub>3</sub>, rotamers seen) δ 167.9, 155.9, 135.7, 135.5, 134.23, 134.16, 133.9, 132.0, 128.8, 128.4, 127.2, 127.0, 126.9, 126.8, 126.0, 125.9, 123.2, 78.7, 78.6, 78.5, 78.4, 53.55, 53.49, 52.6, 38.9, 38.1, 36.8, 28.6, 28.2, 26.8, 26.3, 18.6.

**HRMS** (ESI) calcd for C<sub>24</sub>H<sub>23</sub>O<sub>4</sub>N<sub>2</sub> [M+H]<sup>+</sup>: 403.1652, found: 403.1655.

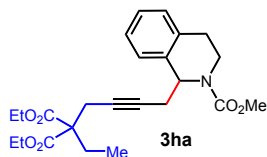

**Diethyl 2-ethyl-2-(4-(2-(methoxycarbonyl)-1,2,3,4-tetrahydroisoquinolin-1-yl) but-2-yn-1-yl) malonate (3ha):** Prepared following general procedure A, using diethyl 2-(but-2-yn-1-yl)-2-ethylmalonate (**1h**, 72 mg, 0.3 mmol, 1.0 equiv) and methyl 3,4-dihydroisoquinoline-2(1H)-carboxylate (**2a**, 86.1 mg, 0.45 mmol, 1.5 equiv). The crude residue was diluted with  $\text{CH}_2\text{Cl}_2$  and washed with 1N HCl to remove the *sym*-collidine. The extracts were combined and concentrated, purified by flash column chromatography, eluting with 20% ethyl acetate in hexane to provide the product **3ha** as a colorless oil (77 mg, 60% yield).

**$^1\text{H}$  NMR** (500 MHz,  $\text{CDCl}_3$ , rotamers seen)  $\delta$  7.22-7.14 (m, 3H), 7.14-7.06 (m, 1H), 5.22 (t,  $J = 6.5$  Hz, 0.5H), 5.13 (t,  $J = 7.0$  Hz, 0.5H), 4.22-4.04 (m, 4.5H), 4.00-3.87 (m, 0.5H), 3.73 (s, 3H), 3.60-3.47 (m, 0.5H), 3.45-3.31 (m, 0.5H), 3.00-2.50 (m, 6H), 2.00-1.80 (m, 2H), 1.29-1.10 (m, 6H), 0.83-0.65 (m, 3H).

**$^{13}\text{C}$  NMR** (100 MHz,  $\text{CDCl}_3$ , rotamers seen)  $\delta$  170.4, 155.8, 135.6, 135.5, 134.4, 134.3, 128.9, 128.5, 127.2, 127.0, 126.9, 126.7, 126.1, 126.0, 79.5, 79.4, 77.20, 77.17, 61.2, 57.3, 53.45, 53.38, 52.61, 52.58, 39.1, 38.2, 28.7, 28.3, 26.9, 26.4, 24.7, 22.4, 14.0, 8.2.

**HRMS** (ESI) calcd for  $\text{C}_{24}\text{H}_{32}\text{O}_6\text{N}$   $[\text{M}+\text{H}]^+$ : 430.2224, found: 430.2217.

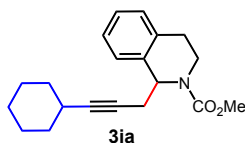

**Methyl 1-(3-cyclohexylprop-2-yn-1-yl)-3,4-dihydroisoquinoline-2(1H)-carboxylate (3ia):** Prepared following general procedure A, using prop-1-yn-1-ylcyclohexane (**1i**, 36.6 mg, 0.3 mmol, 1.0 equiv) and methyl 3,4-dihydroisoquinoline-2(1H)-carboxylate (**2a**, 86.1 mg, 0.45 mmol, 1.5 equiv). The crude residue was purified by flash column chromatography, eluting with pure DCM to provide the product **3ia** as a colorless oil (66 mg, 60% yield).

**$^1\text{H}$  NMR** (500 MHz,  $\text{CDCl}_3$ , rotamers seen)  $\delta$  7.25-7.08 (m, 4H), 5.28 (t,  $J = 6.0$  Hz, 0.5H), 5.19 (t,  $J = 6.5$  Hz, 0.5H), 4.25-4.15 (m, 0.5H), 4.00-3.90 (m, 0.5H), 3.75 (s, 3H), 3.63-3.53 (m, 0.5H), 3.47-3.35 (m, 0.5H), 3.00-2.55 (m, 4H), 2.28 (s, 1H), 1.80-1.55 (m, 4H), 1.55-1.40 (m, 1H), 1.40-1.13 (m, 5H).

**$^{13}\text{C}$  NMR** (125 MHz,  $\text{CDCl}_3$ , rotamers seen)  $\delta$  156.0, 155.9, 136.0, 135.8, 134.3, 134.2, 128.9, 128.4, 127.4, 127.1, 126.9, 126.8, 126.0, 125.9, 87.1, 87.0, 76.5, 76.2, 53.8, 52.6, 39.0, 38.0, 32.8, 32.7, 29.7, 29.1, 29.0, 28.7, 28.4, 26.9, 26.5, 25.9, 24.8, 24.7.

**HRMS** (ESI) calcd for  $\text{C}_{20}\text{H}_{26}\text{O}_2\text{N}$   $[\text{M}+\text{H}]^+$ : 312.1958, found: 312.1960.

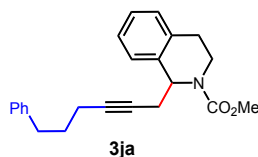

**Methyl 1-(6-phenylhex-2-yn-1-yl)-3,4-dihydroisoquinoline-2(1H)-carboxylate (3ja):**

Prepared following general procedure A, using hex-4-yn-1-ylbenzene (**1j**, 47.4 mg, 0.3 mmol, 1.0 equiv) and methyl 3,4-dihydroisoquinoline-2(1H)-carboxylate (**2a**, 86.1 mg, 0.45 mmol, 1.5 equiv). The crude residue was purified by flash column chromatography, eluting with pure DCM to provide the product **3ja** as a colorless oil (65 mg, 62% yield, 10:1 r.r.).

<sup>1</sup>H NMR (500 MHz, CDCl<sub>3</sub>, rotamers seen) δ 7.50-7.00 (m, 9H), 5.35 (t, *J* = 6.0 Hz, 0.5H), 5.25 (t, *J* = 6.0 Hz, 0.5H), 4.33-4.16 (m, 0.5H), 4.10-3.94 (m, 0.5H), 3.77 (s, 1.5H), 3.76 (s, 1.5H), 3.69-3.57 (m, 0.5H), 3.57-3.41 (m, 0.5H), 3.05-2.88 (m, 1H), 2.88-2.69 (m, 3H), 2.69-2.59 (m, 2H), 2.25-2.07 (m, 2H), 1.85-1.65 (m, 2H).

<sup>13</sup>C NMR (125 MHz, CDCl<sub>3</sub>, rotamers seen) δ 156.01, 155.96, 141.7, 141.6, 135.9, 135.7, 134.4, 134.3, 128.9, 128.52, 128.46, 128.2, 127.3, 127.05, 126.95, 126.8, 126.1, 126.0, 125.8, 125.7, 82.4, 82.2, 53.8, 52.6, 39.1, 38.2, 34.7, 34.6, 30.3, 28.7, 28.4, 26.9, 26.5, 18.1.

HRMS (ASAP) calcd for C<sub>23</sub>H<sub>26</sub>NO<sub>2</sub> [M+H]<sup>+</sup>: 348.1964, found: 348.1974.

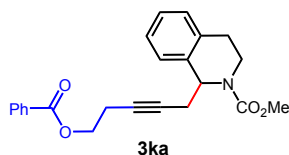

**Methyl 1-(5-(benzyloxy)pent-2-yn-1-yl)-3,4-dihydroisoquinoline-2(1H)-carboxylate (3ka):**

Prepared following general procedure A, using pent-3-yn-1-yl benzoate (**1k**, 56.4 mg, 0.3 mmol, 1.0 equiv) and methyl 3,4-dihydroisoquinoline-2(1H)-carboxylate (**2a**, 86.1 mg, 0.45 mmol, 1.5 equiv). The crude residue was purified by flash column chromatography, eluting with pure DCM to provide the product **3ka** as a colorless oil (58 mg, 51% yield, 4.3:1 r.r.).

<sup>1</sup>H NMR (500 MHz, CDCl<sub>3</sub>, rotamers seen) δ 8.04 (d, *J* = 10.0 Hz, 2H), 7.61-7.53 (m, 1H), 7.44 (t, *J* = 9.5 Hz, 2H), 7.25-7.02 (m, 4H), 5.28 (t, *J* = 7.5 Hz, 0.5H), 5.19 (t, *J* = 7.5 Hz, 0.5H), 4.40-4.25 (m, 2H), 4.21-4.08 (m, 0.5H), 3.97-3.84 (m, 0.5H), 3.75 (s, 1.5H), 3.74 (s, 1.5H), 3.62-3.50 (m, 0.5H), 3.48-3.36 (m, 0.5H), 2.98-2.63 (m, 4H), 2.63-2.51 (m, 2H).

<sup>13</sup>C NMR (125 MHz, CDCl<sub>3</sub>, rotamers seen) δ 166.3, 156.0, 135.7, 135.6, 134.4, 134.3, 133.0, 130.1, 129.7, 128.9, 128.5, 128.4, 127.3, 127.1, 126.9, 126.14, 126.09, 78.6, 78.5, 78.3, 78.2, 63.1, 53.7, 52.7, 39.2, 38.3, 28.7, 28.4, 26.9, 26.5, 19.4.

HRMS (ESI) calcd for C<sub>23</sub>H<sub>24</sub>O<sub>4</sub>N [M+H]<sup>+</sup>: 378.1700, found: 378.1701.

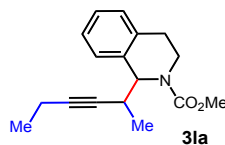

**Methyl 1-(hex-3-yn-2-yl)-3,4-dihydroisoquinoline-2(1H)-carboxylate (3la):** Prepared following general procedure A, using hex-3-yne (**11**, 33  $\mu$ L, 0.3 mmol, 1.0 equiv) and methyl 3,4-dihydroisoquinoline-2(1H)-carboxylate (**2a**, 86.1 mg, 0.45 mmol, 1.5 equiv). The crude residue was purified by flash column chromatography, eluting with pure DCM to provide the product **3la** as a colorless oil (57 mg, 70% yield, 1:1 d.r.). The d.r. value was detected by crude NMR.

**One isomer:**

**<sup>1</sup>H NMR** (500 MHz, CDCl<sub>3</sub>, rotamers seen)  $\delta$  7.42 (d,  $J$  = 6.5 Hz, 0.5H), 7.38 ( $J$  = 7.0 Hz, 0.5H), 7.24-7.06 (m, 3H), 5.01 (d,  $J$  = 8.5 Hz, 0.5H), 4.91 (d,  $J$  = 9.0 Hz, 0.5H), 4.12-4.02 (m, 0.5H), 3.80-3.70 (m, 0.5H), 3.73 (s, 3H), 3.60-3.52 (m, 0.5H), 3.43-3.34 (m, 0.5H), 3.06-2.76 (m, 3H), 2.19-2.06 (m, 2H), 1.26 (d,  $J$  = 6.5 Hz, 1.5H), 1.22 (d,  $J$  = 6.5 Hz, 1.5H), 1.09 (t,  $J$  = 7.5 Hz, 1.5H), 1.05 (t,  $J$  = 7.5 Hz, 1.5H).

**<sup>13</sup>C NMR** (125 MHz, CDCl<sub>3</sub>, rotamers seen)  $\delta$  156.7, 156.3, 135.51, 135.49, 134.4, 134.3, 129.0, 128.8, 128.6, 128.1, 127.2, 127.1, 125.2, 125.1, 85.0, 84.7, 81.5, 59.4, 58.9, 52.7, 52.6, 39.6, 38.6, 32.4, 28.1, 27.7, 19.1, 18.8, 13.8, 12.4.

**HRMS** (ESI) calcd for C<sub>17</sub>H<sub>22</sub>NO<sub>2</sub> [M+H]<sup>+</sup>: 272.1645, found: 272.1648.

**Another isomer:**

**<sup>1</sup>H NMR** (500 MHz, CDCl<sub>3</sub>, rotamers seen)  $\delta$  7.23-7.06 (m, 4H), 5.17 (d,  $J$  = 6.0 Hz, 0.5H), 5.00 (d,  $J$  = 6.0 Hz, 0.5H), 4.22-4.12 (m, 0.5H), 4.04-3.95 (m, 0.5H), 3.95-3.85 (m, 0.5H), 3.85-3.75 (m, 0.5H), 3.72 (s, 3H), 3.09-2.74 (m, 3H), 2.10-1.96 (m, 2H), 1.26 (d,  $J$  = 7.0 Hz, 1.5H), 1.23 (d,  $J$  = 7.0 Hz, 1.5H), 1.03-0.92 (m, 3H).

**<sup>13</sup>C NMR** (125 MHz, CDCl<sub>3</sub>, rotamers seen)  $\delta$  156.7, 157.5, 136.0, 135.7, 134.8, 134.5, 128.9, 128.6, 127.4, 127.3, 126.9, 126.7, 125.9, 125.8, 84.6, 84.4, 81.3, 81.1, 58.2, 57.9, 52.7, 52.5, 39.3, 38.8, 33.14, 33.11, 28.4, 27.9, 18.64, 18.59, 13.93, 13.90, 12.4.

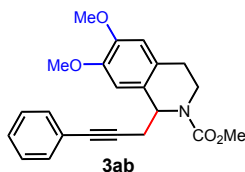

**Methyl 6,7-dimethoxy-1-(3-phenylprop-2-yn-1-yl)-3,4-dihydroisoquinoline-2(1H)-carboxylate (3ab):** Prepared following general procedure A, using prop-1-yn-1-ylbenzene (**1a**, 39  $\mu$ L, 0.3 mmol, 1.0 equiv) and methyl 6,7-dimethoxy-3,4-dihydroisoquinoline-2(1H)-carboxylate (**2b**, 113 mg, 0.45 mmol, 1.5 equiv). The crude residue was purified by flash column chromatography, eluting with 5% ethyl acetate in CH<sub>2</sub>Cl<sub>2</sub> to provide the product **3ab** as a white solid (81 mg, 74% yield).

**Scale-up to 5 mmol:**

In an argon-filled glovebox, to the 50 mL flame-dry flask, methyl 6,7-dimethoxy-3,4-dihydroisoquinoline-2(1H)-carboxylate (**2b**, 1883 mg, 7.5 mmol, 1.5 equiv) and  $\text{Ph}_3\text{C}^+\text{BF}_4^-$  (2800 mg, 8.5 mmol, 1.7 equiv) was stirred in dry trifluorotoluene (15 mL) at room temperature for 3 hours to generate the iminium salt. Then  $\text{Cp}^*\text{Fe}(\text{CO})_2(\text{thf})^+\text{BF}_4^-$  (205 mg, 10 mol%), prop-1-yn-1-ylbenzene **1a** (650  $\mu\text{L}$ , 5 mmol, 1.0 equiv), trifluorotoluene (5 mL) and *sym*-collidine (1.2 mL, 9.0 mmol, 1.8 equiv) were added in rapid succession. The reaction tube was capped and removed from the glovebox. The reaction tube was placed in an oil bath, preheated to 60 °C, where it was stirred for 48 h. After completion of the reaction, the reaction mixture was cooled to room temperature. The crude mixture was concentrated in vacuo and purified by flash column chromatography to provide the desired product **3ab** as a pale-yellow solid (1.008 g, 55% yield)

**m.p.** = 50-51 °C.

**$^1\text{H}$  NMR** (500 MHz,  $\text{CDCl}_3$ , rotamers seen)  $\delta$  7.40-7.31 (m, 2H), 7.31-7.23 (m, 3H), 6.84 (d,  $J = 25$  Hz, 1H), 6.64 (s, 1H), 5.35 (t,  $J = 6.0$  Hz, 0.5H), 5.28 (t,  $J = 6.5$  Hz, 0.5H), 4.31-4.20 (m, 0.5H), 4.04-3.94 (m, 0.5H), 3.88 (s, 3H), 3.81 (s, 1.5H), 3.79 (s, 1.5H), 3.76 (s, 3H), 3.64-3.52 (m, 0.5H), 3.50-3.35 (m, 0.5H), 3.05-2.80 (m, 3H), 2.80-2.67 (m, 1H).

**$^{13}\text{C}$  NMR** (125 MHz,  $\text{CDCl}_3$ , rotamers seen)  $\delta$  156.0, 148.1, 148.0, 147.4, 131.5, 128.3, 128.2, 127.9, 127.8, 127.7, 127.5, 126.5, 126.3, 123.6, 123.4, 111.5, 111.2, 110.5, 110.2, 87.1, 86.8, 83.1, 55.95, 55.91, 53.4, 52.8, 52.7, 39.2, 38.2, 28.3, 28.0, 27.5, 27.1.

**HRMS** (ESI) calcd for  $\text{C}_{22}\text{H}_{24}\text{O}_4\text{N}$   $[\text{M}+\text{H}]^+$ : 366.1700, found: 366.1707.

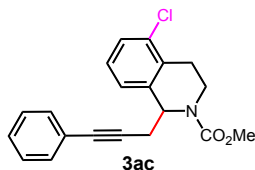

**Methyl 5-chloro-1-(3-phenylprop-2-yn-1-yl)-3,4-dihydroisoquinoline-2(1H)-carboxylate (3ac):** Prepared following general procedure A, using prop-1-yn-1-ylbenzene (**1a**, 39  $\mu\text{L}$ , 0.3 mmol, 1.0 equiv) and methyl 5-chloro-3,4-dihydroisoquinoline-2(1H)-carboxylate (**2c**, 101 mg, 0.45 mmol, 1.5 equiv). The crude residue was purified by flash column chromatography, eluting with pure DCM to provide the product **3ac** as a light-yellow oil (75 mg, 74% yield).

**$^1\text{H}$  NMR** (500 MHz,  $\text{CDCl}_3$ , rotamers seen)  $\delta$  7.42-7.26 (m, 6H), 7.26-7.14 (m, 2H), 5.47 (t,  $J = 6.0$  Hz, 0.5H), 5.37 (t,  $J = 6.5$  Hz, 0.5H), 4.44-4.32 (m, 0.5H), 4.20-4.04 (m, 0.5H), 3.78 (s, 1.5H), 3.77 (s, 1.5H), 3.65-3.55 (m, 0.5H), 3.50-3.38 (m, 0.5H), 3.05-2.80 (m, 4H).

**$^{13}\text{C}$  NMR** (125 MHz,  $\text{CDCl}_3$ , rotamers seen)  $\delta$  155.9, 137.9, 137.8, 134.5, 134.1, 132.6, 132.5, 131.5, 128.3, 128.2, 128.0, 127.9, 127.0, 126.9, 125.9, 125.6, 123.5, 123.3, 86.3, 86.0, 83.3, 53.4, 53.3, 52.9, 38.2, 37.2, 27.4, 27.0, 26.5, 26.3.

**HRMS** (ESI) calcd for C<sub>20</sub>H<sub>19</sub>O<sub>2</sub>NCl [M+H]<sup>+</sup>: 340.1099, found: 340.1111.

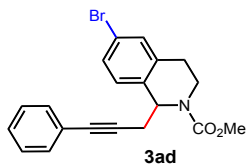

**Methyl 6-bromo-1-(3-phenylprop-2-yn-1-yl)-3,4-dihydroisoquinoline-2(1H)-carboxylate (3ad):** Prepared following general procedure A, using prop-1-yn-1-ylbenzene (**1a**, 39  $\mu$ L, 0.3 mmol, 1.0 equiv) and methyl 6-bromo-3,4-dihydroisoquinoline-2(1H)-carboxylate (**2d**, 122 mg, 0.45 mmol, 1.5 equiv). The crude residue was purified by flash column chromatography, eluting with pure DCM to provide the product **3ad** as a colorless oil (84 mg, 73% yield).

**<sup>1</sup>H NMR** (500 MHz, CDCl<sub>3</sub>, rotamers seen)  $\delta$  7.42-7.25 (m, 7H), 7.24-7.11 (m, 1H), 5.38 (t,  $J$  = 6.0 Hz, 0.5H), 5.30 (t,  $J$  = 6.0 Hz, 0.5H), 4.30-4.18 (m, 0.5H), 4.04-3.90 (m, 0.5H), 3.78 (s, 3H), 3.69-3.58 (m, 0.5H), 3.54-3.42 (m, 0.5H), 3.05-2.75 (m, 4H).

**<sup>13</sup>C NMR** (125 MHz, CDCl<sub>3</sub>, rotamers seen)  $\delta$  156.0, 136.83, 136.76, 134.7, 134.5, 131.8, 131.8, 131.5, 131.4, 129.34, 129.29, 129.1, 128.8, 128.3, 128.2, 128.0, 127.9, 123.5, 123.3, 120.9, 120.8, 86.3, 86.1, 83.3, 53.4, 52.9, 52.8, 38.9, 37.9, 28.6, 28.3, 27.5, 27.1.

**HRMS** (ESI) calcd for C<sub>20</sub>H<sub>19</sub>O<sub>2</sub>NBr [M+H]<sup>+</sup>: 384.0594, found: 384.0602.

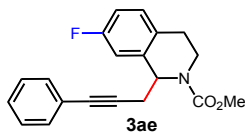

**Methyl 7-fluoro-1-(3-phenylprop-2-yn-1-yl)-3,4-dihydroisoquinoline-2(1H)-carboxylate (3ae):** Prepared following general procedure A, using prop-1-yn-1-ylbenzene (**1a**, 39  $\mu$ L, 0.3 mmol, 1.0 equiv) and methyl 7-fluoro-3,4-dihydroisoquinoline-2(1H)-carboxylate (**2e**, 94 mg, 0.45 mmol, 1.5 equiv). The crude residue was purified by flash column chromatography, eluting with pure DCM to provide the product **3ae** as a colorless oil (73 mg, 75% yield).

**<sup>1</sup>H NMR** (500 MHz, CDCl<sub>3</sub>, rotamers seen)  $\delta$  7.43-7.20 (m, 5H), 7.19-7.10 (m, 1H), 7.10-6.99 (m, 1H), 6.99-6.89 (m, 1H), 5.40 (t,  $J$  = 6.0 Hz, 0.5H), 5.32 (t,  $J$  = 6.0 Hz, 0.5H), 4.33-4.19 (m, 0.5H), 4.05-3.93 (m, 0.5H), 3.78 (s, 3H), 3.69-3.56 (m, 0.5H), 3.54-3.41 (m, 0.5H), 3.07-2.74 (m, 4H).

**<sup>19</sup>F NMR** (470 MHz, CDCl<sub>3</sub>, rotamers seen)  $\delta$  -116.23, -116.16.

**<sup>13</sup>C NMR** (125 MHz, CDCl<sub>3</sub>, rotamers seen)  $\delta$  162.1, 162.0, 160.15, 160.09, 156.0, 137.5, 137.4, 137.3, 137.2, 131.5, 130.44, 130.38, 130.1, 130.0, 128.3, 128.2, 128.0, 127.8, 123.5, 123.3, 114.4, 114.3, 114.1, 113.95, 113.86, 113.7, 86.4, 86.1, 83.32, 83.27, 53.60,

53.58, 52.9, 52.8, 39.3, 38.3, 28.1, 27.8, 27.5, 27.0. (the <sup>13</sup>C spectrum is too complicated to distinguish the C-F coupling)



**HRMS** (ESI) calcd for C<sub>20</sub>H<sub>19</sub>O<sub>2</sub>NF [M+H]<sup>+</sup>: 324.1394, found: 324.1408.

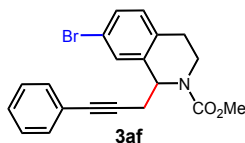

**Methyl 7-bromo-1-(3-phenylprop-2-yn-1-yl)-3,4-dihydroisoquinoline-2(1H)-carboxylate (3af):** Prepared following general procedure A, using prop-1-yn-1-ylbenzene (**1a**, 39  $\mu$ L, 0.3 mmol, 1.0 equiv) and methyl 7-bromo-3,4-dihydroisoquinoline-2(1H)-carboxylate (**2f**, 122 mg, 0.45 mmol, 1.5 equiv). The crude residue was purified by flash column chromatography, eluting with pure DCM to provide the product **3af** as a colorless oil (80 mg, 69% yield).

**<sup>1</sup>H NMR** (500 MHz, CDCl<sub>3</sub>, rotamers seen)  $\delta$  7.50 (d,  $J$  = 16.5 Hz, 1H), 7.43-7.33 (m, 3H), 7.33-7.25 (m, 3H), 7.09-7.00 (m, 1H), 5.38 (t,  $J$  = 5.5 Hz, 0.5H), 5.30 (t,  $J$  = 6.5 Hz, 0.5H), 4.33-4.17 (m, 0.5H), 4.04-3.93 (m, 0.5H), 3.78 (s, 3H), 3.69-3.56 (m, 0.5H), 3.53-3.41 (m, 0.5H), 3.05-2.75 (m, 4H).

**<sup>13</sup>C NMR** (125 MHz, CDCl<sub>3</sub>, rotamers seen)  $\delta$  156.0, 137.8, 137.6, 133.5, 131.5, 130.6, 130.4, 130.3, 130.2, 128.3, 128.2, 128.0, 127.9, 123.4, 123.3, 119.7, 119.6, 86.3, 86.0, 83.5, 53.3, 52.9, 52.8, 39.1, 38.1, 28.3, 28.0, 27.5, 27.1.

**HRMS** (ESI) calcd for C<sub>20</sub>H<sub>19</sub>O<sub>2</sub>NBr [M+H]<sup>+</sup>: 384.0593, found: 384.0602.

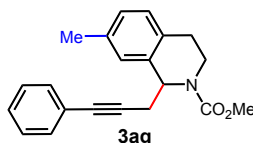

**Methyl 7-methyl-1-(3-phenylprop-2-yn-1-yl)-3,4-dihydroisoquinoline-2(1H)-carboxylate (3ag):** Prepared following general procedure A, using prop-1-yn-1-ylbenzene (**1a**, 26  $\mu$ L, 0.2 mmol, 1.0 equiv) and methyl 7-methyl-3,4-dihydroisoquinoline-2(1H)-carboxylate (**2g**, 61 mg, 0.3 mmol, 1.5 equiv). The crude residue was purified by flash column chromatography, eluting with pure DCM to provide the product **3ag** as a colorless oil (43 mg, 67% yield).

**<sup>1</sup>H NMR** (500 MHz, CDCl<sub>3</sub>, rotamers seen)  $\delta$  7.49-7.20 (m, 5H), 7.19-6.95 (m, 3H), 5.39 (s, 0.5H), 5.33 (s, 0.5H), 4.34-4.20 (m, 0.5H), 4.05-3.92 (m, 0.5H), 3.77 (s, 3H), 3.70-3.55 (m, 0.5H), 3.54-3.40 (m, 0.5H), 3.10-2.70 (m, 4H), 2.35 (s, 3H).

**<sup>13</sup>C NMR** (125 MHz, CDCl<sub>3</sub>, rotamers seen)  $\delta$  156.1, 135.64, 135.61, 135.5, 135.4, 131.4, 131.3, 128.8, 128.3, 128.2, 128.1, 128.0, 127.9, 127.83, 127.78, 127.7, 123.7, 123.5, 87.0, 86.6, 82.9, 53.7, 52.7, 52.6, 39.4, 38.3, 28.3, 28.0, 27.5, 27.2, 21.1.

**HRMS** (ESI) calcd for C<sub>21</sub>H<sub>22</sub>O<sub>2</sub>N [M+H]<sup>+</sup>: 320.1645, found: 320.1658.

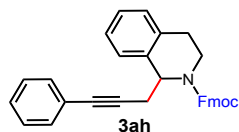

**Methyl 7-methyl-1-(3-phenylprop-2-yn-1-yl)-3,4-dihydroisoquinoline-2(1H)-carboxylate (3ah):** Prepared following general procedure A, using prop-1-yn-1-ylbenzene (**1a**, 39  $\mu$ L, 0.3 mmol, 1.0 equiv) and (9H-fluoren-9-yl) methyl 3,4-dihydroisoquinoline-2(1H)-carboxylate (**2h**, 159 mg, 0.45 mmol, 1.5 equiv). The crude residue was purified by flash column chromatography, eluting with pure DCM to provide the product **3ah** as a colorless oil (78 mg, 55% yield).

**<sup>1</sup>H NMR** (500 MHz, CDCl<sub>3</sub>, rotamers seen)  $\delta$  7.85-7.70 (m, 2H), 7.70-7.50 (m, 2H), 7.47-7.40 (m, 2H), 7.40-7.23 (m, 10H), 7.23-7.16 (m, 1H), 5.46 (s, 0.5H), 5.22 (s, 0.5H), 4.64-4.42 (m, 2H), 4.36-4.24 (m, 1H), 4.23-4.14 (m, 0.5H), 4.06-3.94 (m, 0.5H), 3.78-3.66 (m, 0.5H), 3.60-3.48 (m, 0.5H), 3.06-2.74 (m, 4H).

**<sup>13</sup>C NMR** (125 MHz, CDCl<sub>3</sub>, rotamers seen)  $\delta$  155.4, 144.1, 144.0, 143.9, 141.33, 141.31, 135.6, 135.4, 134.4, 134.3, 131.5, 128.9, 128.5, 128.2, 128.1, 127.8, 127.64, 127.57, 127.4, 127.22, 127.19, 127.1, 127.0, 126.3, 126.1, 125.0, 124.9, 123.6, 123.5, 119.94, 119.90, 86.7, 86.5, 83.1, 82.9, 67.5, 67.4, 53.9, 53.8, 47.3, 39.4, 38.6, 28.7, 28.3, 27.6, 27.2.

**HRMS** (ESI) calcd for C<sub>33</sub>H<sub>28</sub>O<sub>2</sub>N [M+H]<sup>+</sup>: 470.2115, found: 470.2126.

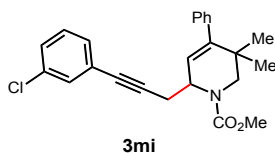

**Methyl 6-(3-(3-chlorophenyl)prop-2-yn-1-yl)-3,3-dimethyl-4-phenyl-3,6-dihydropyridine-1(2H)-carboxylate (3mi):** Prepared following general procedure A, using 1-chloro-3-(prop-1-yn-1-yl)benzene (**1m**, 45 mg, 0.3 mmol, 1.0 equiv) and methyl 3,3-dimethyl-4-phenyl-3,6-dihydropyridine-1(2H)-carboxylate (**2i**, 110 mg, 0.45 mmol, 1.5 equiv). The crude residue was purified by flash column chromatography, eluting with pure DCM to provide the product **3mi** as a colorless oil (72 mg, 61% yield).

**<sup>1</sup>H NMR** (400 MHz, CDCl<sub>3</sub>, rotamers seen)  $\delta$  7.42-7.37 (m, 1H), 7.37-7.25 (m, 5H), 7.25-7.16 (m, 3H), 5.66 (s, 1H), 4.83 (s, 0.5H), 4.73 (s, 0.5H), 4.10-3.96 (m, 0.5H), 3.75-3.85 (m, 0.5H), 3.81 (s, 3H), 3.18 (d,  $J$  = 12.4 Hz, 0.5H), 3.05 (d,  $J$  = 12.8 Hz, 0.5H), 2.80 (d,  $J$  = 12.0 Hz, 2H), 1.26 (s, 3H), 0.91 (s, 3H).

**<sup>13</sup>C NMR** (100 MHz, CDCl<sub>3</sub>, rotamers seen)  $\delta$  156.2, 156.1, 148.3, 147.9, 141.0, 134.1, 131.4, 129.6, 129.5, 128.5, 128.1, 127.8, 126.9, 125.4, 125.3, 124.6, 124.1, 88.3, 87.9, 81.5, 52.8, 52.2, 51.5, 35.5, 25.8, 24.9, 24.7, 24.3.

**HRMS** (ESI) calcd for C<sub>24</sub>H<sub>25</sub>O<sub>2</sub>NCl [M+H]<sup>+</sup>: 394.1574, found: 394.1579.

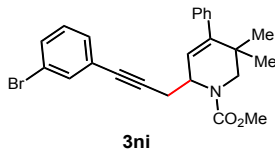

**Methyl 6-(3-(3-bromophenyl)prop-2-yn-1-yl)-3,3-dimethyl-4-phenyl-3,6-dihydropyridine-1(2H)-carboxylate (3ni):** Prepared following general procedure A, using 1-bromo-3-(prop-1-yn-1-yl)benzene (**1n**, 59 mg, 0.3 mmol, 1.0 equiv) and methyl 3,3-dimethyl-4-phenyl-3,6-dihydropyridine-1(2H)-carboxylate (**4i**, 110 mg, 0.45 mmol, 1.5 equiv). The crude residue was purified by flash column chromatography, eluting with pure DCM to provide the product **3ni** as a colorless oil (85 mg, 65% yield).

**<sup>1</sup>H NMR** (500 MHz, CDCl<sub>3</sub>, rotamers seen) δ 7.58-7.52 (m, 1H), 7.43 (d, *J* = 8.0 Hz, 1H), 7.37-7.29 (m, 4H), 7.25-7.19 (m, 2H), 7.16 (t, *J* = 8.0 Hz, 1H), 5.66 (s, 0.5H), 5.65 (s, 0.5H), 4.83 (s, 0.5H), 4.72 (s, 0.5H), 4.03 (d, *J* = 13.0 Hz, 0.5H), 3.84 (d, *J* = 13.0 Hz, 0.5H), 3.81 (s, 3H), 3.18 (d, *J* = 13.0 Hz, 0.5H), 3.04 (d, *J* = 12.5 Hz, 0.5H), 2.90-2.68 (m, 2H), 1.26 (s, 1.5H), 1.24 (s, 1.5H), 0.91 (s, 3H).

**<sup>13</sup>C NMR** (125 MHz, CDCl<sub>3</sub>, rotamers seen) δ 156.2, 156.0, 148.3, 147.9, 141.0, 134.3, 131.0, 130.1, 129.7, 128.5, 127.8, 126.9, 125.5, 124.6, 124.1, 122.1, 88.5, 88.1, 81.4, 52.9, 52.7, 52.2, 51.4, 35.5, 25.7, 24.9, 24.7, 24.3.

**HRMS** (ESI) calcd for C<sub>24</sub>H<sub>25</sub>O<sub>2</sub>NBr [M+H]<sup>+</sup>: 438.1078, found: 438.1063.

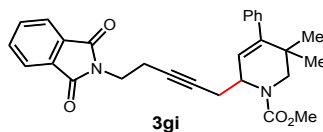

**Methyl 6-(5-(1,3-dioxisoindolin-2-yl)pent-2-yn-1-yl)-3,3-dimethyl-4-phenyl-3,6-dihydropyridine-1(2H)-carboxylate (3gi):** Prepared following general procedure A, using 2-(pent-3-yn-1-yl)isoindoline-1,3-dione (**1g**, 64 mg, 0.3 mmol, 1.0 equiv) and methyl 3,3-dimethyl-4-phenyl-3,6-dihydropyridine-1(2H)-carboxylate (**2i**, 110 mg, 0.45 mmol, 1.5 equiv). The crude residue was purified by flash column chromatography, eluting with 20% ethyl acetate in hexane to provide the product **3gi** as a pale-yellow oil (81 mg, 59% yield).

**<sup>1</sup>H NMR** (400 MHz, CDCl<sub>3</sub>, rotamers seen) δ 7.84-7.74 (m, 2H), 7.74-7.64 (m, 2H), 7.36-7.26 (m, 3H), 7.22-7.12 (m, 2H), 5.56 (s, 1H), 4.64 (s, 0.5H), 4.52 (s, 0.5H), 3.98-3.66 (m, 6H), 3.02 (d, *J* = 11.6 Hz, 0.5H), 2.87 (d, *J* = 12.4 Hz, 0.5H), 2.66-2.65 (m, 2H), 2.54-2.32 (m, 2H), 1.19 (s, 3H), 0.86 (s, 3H).

**<sup>13</sup>C NMR** (100 MHz, CDCl<sub>3</sub>, rotamers seen) δ 168.0, 156.2, 155.9, 147.7, 147.4, 141.0, 133.9, 132.0, 128.6, 127.7, 126.8, 124.8, 124.2, 123.3, 78.5, 52.7, 52.0, 51.6, 36.9, 35.4, 25.7, 24.7, 24.1, 23.5, 18.8;

**HRMS** (ESI) calcd for C<sub>28</sub>H<sub>29</sub>O<sub>4</sub>N<sub>2</sub> [M+H]<sup>+</sup>: 457.2127, found: 457.2130.

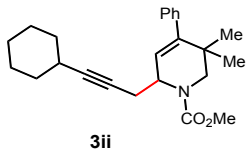

**Methyl 6-(3-cyclohexylprop-2-yn-1-yl)-3,3-dimethyl-4-phenyl-3,6-dihydropyridine-1(2H)-carboxylate (3ii):** Prepared following general procedure A, using prop-1-yn-1-ylcyclohexane (**1i**, 36.6 mg, 0.3 mmol, 1.0 equiv) and methyl 3,3-dimethyl-4-phenyl-3,6-dihydropyridine-1(2H)-carboxylate (**2i**, 110 mg, 0.45 mmol, 1.5 equiv). The crude residue was purified by flash column chromatography, eluting with pure DCM to provide the product **3ii** as a colorless oil (62 mg, 57% yield).

**<sup>1</sup>H NMR** (500 MHz, CDCl<sub>3</sub>, rotamers seen) δ 7.45-7.10 (m, 5H), 5.62 (s, 1H), 4.68 (s, 0.5H), 4.57 (s, 0.5H), 3.97 (d, *J* = 12.5 Hz, 0.5H), 3.87-3.65 (m, 3.5H), 3.19 (d, *J* = 12.0 Hz, 0.5H), 3.05 (d, *J* = 12.0 Hz, 0.5H), 2.70-2.45 (m, 2H), 2.40-2.25 (m, 1H), 1.85-1.65 (m, 4H), 1.57-1.45 (m, 1H), 1.45-1.35 (m, 2H), 1.35-1.15 (m, 6H), 0.90 (s, 3H).

**<sup>13</sup>C NMR** (125 MHz, CDCl<sub>3</sub>, rotamers seen) δ 156.3, 155.9, 147.7, 147.2, 141.3, 128.5, 127.7, 126.8, 125.2, 124.7, 87.1, 86.9, 76.5, 76.2, 52.7, 52.6, 52.3, 51.7, 51.6, 35.3, 33.0, 29.2, 25.9, 24.9, 24.7, 24.2, 23.6.

**HRMS** (ESI) calcd for C<sub>24</sub>H<sub>32</sub>O<sub>2</sub>N [M+H]<sup>+</sup>: 366.2428, found: 366.2439.

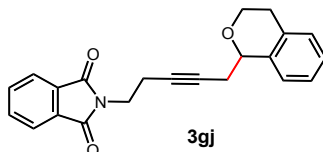

**2-(5-(Isochroman-1-yl)pent-3-yn-1-yl)isoindoline-1,3-dione (3gj):** Prepared following general procedure A, using 2-(pent-3-yn-1-yl)isoindoline-1,3-dione (**1g**, 64 mg, 0.3 mmol, 1.0 equiv) and isochroman (**2j**, 60.3 mg, 0.45 mmol, 1.5 equiv) in CHCl<sub>3</sub> (0.2 M). The crude residue was purified by flash column chromatography, eluting with pure DCM to provide the product **3gj** as a colorless oil (53 mg, 51% yield, > 20:1 r.r.).

**<sup>1</sup>H NMR** (500 MHz, CDCl<sub>3</sub>) δ 7.90-7.80 (m, 2H), 7.75-7.65 (m, 2H), 7.17-7.03 (m, 4H), 4.85-4.75 (m, 1H), 4.12-4.05 (m, 1H), 3.82 (t, *J* = 7.5 Hz, 2H), 3.77-3.68 (m, 1H), 3.00-2.89 (m, 1H), 2.76-2.54 (m, 5H).

**<sup>13</sup>C NMR** (125 MHz, CDCl<sub>3</sub>) δ 168.0, 136.9, 134.0, 133.9, 132.1, 128.8, 126.6, 126.1, 124.8, 123.3, 79.2, 77.7, 74.6, 63.3, 37.0, 28.9, 26.8, 18.9.

**HRMS** (ESI) calcd for C<sub>22</sub>H<sub>20</sub>O<sub>3</sub>N [M+H]<sup>+</sup>: 346.1438, found: 346.1454.

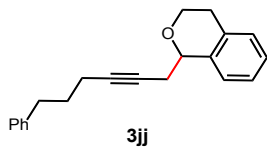

**1-(6-Phenylhex-2-yn-1-yl)isochromane (3jj):** Prepared following general procedure A, using hex-4-yn-1-ylbenzene (**1j**, 47 mg, 0.3 mmol, 1.0 equiv) and isochroman (**2j**, 60.3

mg, 0.45 mmol, 1.5 equiv) in CHCl<sub>3</sub> (0.2 M). The crude residue was purified by flash column chromatography, eluting with 33% DCM in hexanes to provide the product **3jj** as a colorless oil (39 mg, 45% yield, 15:1 r.r.).

<sup>1</sup>H NMR (500 MHz, CDCl<sub>3</sub>) δ 7.22-7.15 (m, 2H), 7.15-6.98 (m, 7H), 4.86-4.78 (m, 1H), 4.18-4.08 (m, 1H), 4.80-4.69 (m, 1H), 3.00-2.87 (m, 1H), 2.78-2.58 (m, 3H), 2.55 (t, *J* = 7.5 Hz, 2H), 2.13-2.03 (m, 2H), 1.73-1.62 (m, 2H).

<sup>13</sup>C NMR (125 MHz, CDCl<sub>3</sub>) δ 141.9, 137.1, 134.2, 128.9, 128.6, 128.3, 126.6, 126.2, 125.8, 125.0, 81.6, 77.4, 74.9, 63.5, 34.6, 30.5, 29.0, 26.8, 18.3.

HRMS (ESI) calcd for C<sub>21</sub>H<sub>23</sub>O [M+H]<sup>+</sup>: 291.1743, found: 291.1778.

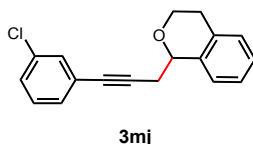

**1-(3-(3-Chlorophenyl)prop-2-yn-1-yl)isochromane (3mj):** Prepared following general procedure C, using 1-chloro-3-(prop-1-yn-1-yl)benzene (**1m**, 45 mg, 0.3 mmol, 1.0 equiv) and isochroman (**2j**, 60.3 mg, 0.45 mmol, 1.5 equiv) in CHCl<sub>3</sub> (0.2 M). The crude residue was purified by flash column chromatography, eluting with pure DCM to provide the product **3mj** as a colorless oil (34 mg, 40% yield).

<sup>1</sup>H NMR (500 MHz, CDCl<sub>3</sub>) δ 7.37 (s, 1H), 7.30-7.14 (m, 7H), 5.04 (t, *J* = 5.0 Hz, 1H), 4.28-4.18 (m, 1H), 3.92-3.82 (m, 1H), 3.10-3.00 (m, 2H), 3.00-2.91 (m, 1H), 2.80-2.70 (m, 1H).

<sup>13</sup>C NMR (125 MHz, CDCl<sub>3</sub>) δ 136.7, 134.2, 133.9, 131.6, 129.8, 129.3, 128.9, 128.0, 126.8, 126.3, 125.4, 124.9, 88.5, 80.9, 74.5, 63.4, 29.0, 27.6.

HRMS (ESI) calcd for C<sub>18</sub>H<sub>16</sub>OCl [M+H]<sup>+</sup>: 283.0884, found: 283.0905.

## General procedure B for propargylic C-H functionalization of alkenes.

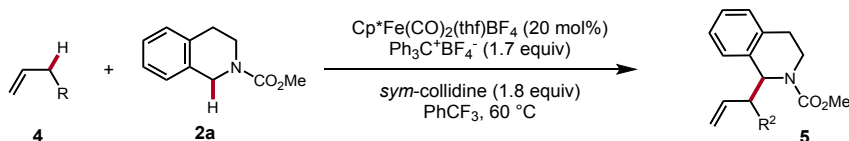

A reaction tube (13 mm × 100 mm, Fisherbrand, part # 14-959-35C) equipped with a magnetic stir bar was capped with a Teflon/silicone septum (Thermo/National part # C4015-66A) screw cap and flame dried under vacuum. The reaction tube was cooled under argon and transferred into a nitrogen-filled glovebox. In the glovebox, the suspension of carbamate (**2a**, 0.45 mmol, 1.5 equiv) and Ph<sub>3</sub>C<sup>+</sup>BF<sub>4</sub><sup>-</sup> (168 mg, 0.51 mmol, 1.7 equiv) in dry trifluorotoluene (1 mL) was stirred at room temperature for 3 hours to generate the iminium salt. Then Cp\*Fe(CO)<sub>2</sub>(thf)<sup>+</sup>BF<sub>4</sub><sup>-</sup> (20 mol%, 24.6 mg), alkene **4** (0.3 mmol, 1.0 equiv), trifluorotoluene (0.5 mL) and *sym*-collidine (72 μL, 0.54 mmol,

1.8 equiv) were added in rapid succession. The reaction tube was capped and removed from the glovebox. The reaction tube was placed in an oil bath, preheated to 60 °C, where it was stirred for 48 h. After completion of the reaction, the reaction mixture was cooled to room temperature. The crude mixture was concentrated in vacuo and purified by flash column chromatography to provide the desired product **5**.

### Characterization Data for Products **5**:

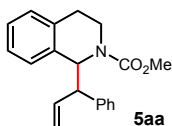

**Methyl 1-(1-phenylallyl)-3,4-dihydroisoquinoline-2(1H)-carboxylate (5aa)**: Prepared following general procedure B, using prop-1-yn-1-ylbenzene (**4a**, 39  $\mu$ L, 0.3 mmol, 1.0 equiv) and methyl 3,4-dihydroisoquinoline-2(1H)-carboxylate (**2a**, 86.1 mg, 0.45 mmol, 1.5 equiv). The crude residue was purified by flash column chromatography, eluting with pure DCM to provide the product **5aa** as a colorless oil (86 mg, 93% yield, 1:1 d.r.). The diastereoisomer could not be separated by column.

**<sup>1</sup>H NMR** (500 MHz, CDCl<sub>3</sub>, rotamers and diastereoisomer seen)  $\delta$  7.40-6.65 (m, 8.5H), 6.27-5.90 (m, 1.5H), 5.43-5.15 (m, 1H), 5.08-4.76 (m, 2H), 4.03- 3.30 (m, 6H), 2.93-2.45 (m, 2H).

**<sup>13</sup>C NMR** (125 MHz, CDCl<sub>3</sub>, rotamers and diastereoisomer seen)  $\delta$  156.8, 156.4, 156.3, 155.9, 141.7, 141.5, 141.4, 141.3, 139.2, 138.4, 138.2, 138.1, 135.7, 135.3, 135.1, 135.0, 134.6, 134.4, 134.2, 134.1, 128.81, 128.75, 128.71, 128.67, 128.62, 128.58, 128.5, 128.4, 128.30, 128.28, 128.26, 128.23, 128.19, 127.9, 127.7, 127.2, 127.0, 126.91, 126.89, 126.78, 126.75, 126.5, 125.29, 125.26, 125.16, 125.11, 117.63, 117.56, 116.4, 115.9, 60.0, 59.73, 59.70, 59.6, 57.9, 57.6, 56.7, 56.5, 52.75, 52.67, 52.6, 52.4, 39.54, 39.46, 39.0, 38.7, 28.2, 27.9, 27.8, 27.7.

**HRMS** (ESI) calcd for C<sub>20</sub>H<sub>22</sub>O<sub>2</sub>N [M+H]<sup>+</sup>: 308.1645, found: 308.1636.

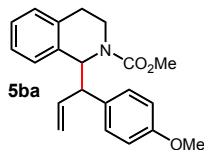

**Methyl 1-(1-(4-methoxyphenyl)allyl)-3,4-dihydroisoquinoline-2(1H)-carboxylate (5ba)**: Prepared following general procedure B, using 1-allyl-4-methoxybenzene (**4b**, 45 mg, 0.3 mmol, 1.0 equiv) and methyl 3,4-dihydroisoquinoline-2(1H)-carboxylate (**2a**, 86.1 mg, 0.45 mmol, 1.5 equiv). The crude residue was purified by flash column chromatography, eluting with pure DCM to provide the product **5ba** as a colorless oil (85 mg, 84% yield, 1.3:1 d.r.). The diastereoisomer could be separated by column.

One isomer:

**<sup>1</sup>H NMR** (500 MHz, CDCl<sub>3</sub>, rotamers seen) δ 7.23-7.02 (m, 2H), 7.00 (t, *J* = 8.0 Hz, 2H), 6.93-6.85 (m, 1H), 6.85-6.73 (m, 2H), 6.35 (d, *J* = 8.0 Hz, 0.5H), 6.30 (d, *J* = 8.0 Hz, 0.5H), 6.27-6.05 (m, 1H), 5.39 (d, *J* = 9.0 Hz, 0.5H), 5.25 (d, *J* = 9.0 Hz, 0.5H), 5.15-4.97 (m, 2H), 4.10-3.67 (m, 7H), 3.58 (t, *J* = 9.0 Hz, 1H), 3.55-3.36 (m, 1H), 3.00-2.75 (m, 1H), 2.74-2.55 (m, 1H).

**<sup>13</sup>C NMR** (125 MHz, CDCl<sub>3</sub>, rotamers seen) δ 158.5, 158.4, 139.5, 138.7, 135.7, 135.4, 134.2, 134.1, 133.7, 133.5, 129.71, 129.66, 128.7, 128.2, 128.0, 127.8, 126.95, 126.86, 125.3, 125.2, 116.0, 115.5, 113.97, 113.89, 60.0, 59.8, 56.9, 56.7, 55.27, 55.25, 52.73, 52.68, 39.4, 38.7, 27.9, 27.7.

Another isomer:

**<sup>1</sup>H NMR** (500 MHz, CDCl<sub>3</sub>, rotamers seen) δ 7.24-7.00 (m, 5H), 6.95-6.76 (m, 3H), 6.15-5.95 (m, 1H), 5.41 (d, *J* = 7.0 Hz, 0.5H), 5.26 (d, *J* = 7.5 Hz, 0.5H), 5.05 (t, *J* = 9.0 Hz, 1H), 4.98 (d, *J* = 17.0 Hz, 0.5H), 4.91 (d, *J* = 17.0 Hz, 0.5H), 3.98-3.76 (m, 4H), 3.76-3.54 (m, 4H), 3.50-3.34 (m, 1H), 2.98-2.76 (m, 2H).

**<sup>13</sup>C NMR** (125 MHz, CDCl<sub>3</sub>, rotamers seen) δ 158.2, 158.1, 156.4, 155.9, 138.4, 138.3, 135.1, 135.0, 134.5, 134.4, 133.5, 133.2, 129.1, 129.0, 128.7, 128.6, 128.5, 128.3, 127.0, 126.8, 125.2, 125.0, 117.2, 117.1, 113.63, 113.59, 59.7, 59.6, 55.8, 55.5, 55.1, 52.5, 52.4, 39.5, 38.9, 28.1, 27.7.

**HRMS** (ESI) calcd for C<sub>21</sub>H<sub>24</sub>O<sub>3</sub>N [M+H]<sup>+</sup>: 338.1750, found: 338.1741.

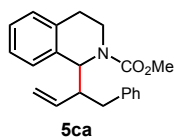

**Methyl 1-(1-phenylbut-3-en-2-yl)-3,4-dihydroisoquinoline-2(1H)-carboxylate (5ca):**

Prepared following general procedure B, using but-3-en-1-ylbenzene (**4c**, 45 μL, 0.3 mmol, 1.0 equiv) and methyl 3,4-dihydroisoquinoline-2(1H)-carboxylate (**2a**, 86.1 mg, 0.45 mmol, 1.5 equiv). The crude residue was purified by flash column chromatography, eluting with pure DCM to provide the product **5ca** as a colorless oil (34 mg, 35% yield, 1.2:1 d.r.). The diastereoisomer could not be separated by column.

**<sup>1</sup>H NMR** (500 MHz, CDCl<sub>3</sub>, rotamers and diastereoisomer seen) δ 7.28-7.00 (m, 9H), 5.80-5.48 (m, 1H), 5.28-4.98 (m, 1H), 4.93-4.82 (m, 1H), 4.72-4.50 (m, 1H), 4.10-3.66 (m, 4H), 3.66-3.46 (m, 1H), 3.08-2.50 (m, 5H).

**<sup>13</sup>C NMR** (125 MHz, CDCl<sub>3</sub>, rotamers and diastereoisomer seen) δ 156.96, 156.91, 156.48, 146.46, 140.42, 140.30, 140.11, 140.07, 138.62, 138.47, 138.30, 138.09, 136.70, 136.24, 135.80, 135.36, 134.80, 134.71, 134.58, 134.53, 129.24, 129.19, 129.14, 128.99, 128.70, 128.55, 128.31, 128.20, 128.09, 128.03, 127.69, 127.12, 127.09, 126.99, 125.96, 125.90, 125.84, 125.77, 125.42, 125.31, 117.94, 117.88, 117.45, 117.16, 59.28, 58.86, 58.68, 58.57, 53.35, 52.96, 52.74, 52.69, 52.66, 52.52, 52.35, 40.31, 39.85, 39.68, 38.52, 38.38, 38.36, 38.26, 28.16, 27.98, 27.89, 27.68.

**HRMS** (ESI) calcd for C<sub>21</sub>H<sub>24</sub>O<sub>2</sub>N [M+H]<sup>+</sup>: 322.1802, found: 322.1800.

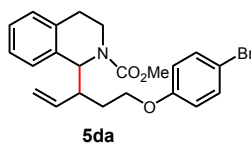

**Methyl 1-(5-(4-bromophenoxy)pent-1-en-3-yl)-3,4-dihydroisoquinoline-2(1H)-carboxylate (5da):** Prepared following general procedure B, using 1-bromo-4-(pent-4-en-1-yloxy)benzene (**4d**, 72 mg, 0.3 mmol, 1.0 equiv) and methyl 3,4-dihydroisoquinoline-2(1H)-carboxylate (**2a**, 86.1 mg, 0.45 mmol, 1.5 equiv). The crude residue was purified by flash column chromatography, eluting with pure DCM to provide the product **5da** as a colorless oil (43 mg, 33% yield, 1.2:1 d.r.). The diastereoisomer could not be separated by column.

**<sup>1</sup>H NMR** (500 MHz, CDCl<sub>3</sub>, rotamers and diastereoisomer seen) δ 7.40-7.27 (m, 2H), 7.23-7.03 (m, 4H), 6.80-6.65 (m, 2H), 5.81-5.50 (m, 1H), 5.20-4.75 (m, 3H), 4.10-3.75 (m, 3H), 3.75-3.67 (m, 3H), 3.63-3.43 (m, 1H), 3.00-2.80 (m, 2H), 2.77-2.63 (m, 1H), 2.20-2.00 (m, 1H), 1.87-1.70 (m, 1H).

**<sup>13</sup>C NMR** (125 MHz, CDCl<sub>3</sub>, rotamers and diastereoisomer seen) δ 158.06, 158.01, 156.96, 156.90, 156.40, 156.35, 138.54, 138.46, 138.31, 137.95, 136.25, 135.84, 135.75, 135.35, 134.72, 134.54, 134.39, 132.20, 132.18, 132.16, 129.00, 128.79, 128.64, 128.59, 128.30, 127.97, 127.73, 127.22, 127.10, 127.02, 126.50, 126.33, 126.00, 125.84, 125.38, 125.25, 118.40, 118.31, 117.78, 117.27, 116.40, 116.35, 116.29, 112.81, 112.73, 112.68, 112.66, 66.26, 65.99, 65.83, 58.73, 58.53, 58.50, 58.37, 52.78, 52.74, 52.69, 52.57, 47.53, 47.30, 47.28, 47.08, 40.15, 40.02, 39.63, 39.37, 30.95, 30.81, 30.49, 28.08, 27.93, 27.78, 27.57.

**HRMS** (ESI) calcd for C<sub>22</sub>H<sub>25</sub>O<sub>3</sub>NBr [M+H]<sup>+</sup>: 433.1012, found: 433.1017.

### General procedure C for propargylic C-H functionalization of alkynes.

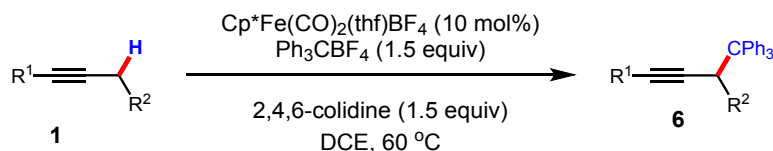

A reaction tube (13 mm × 100 mm, Fisherbrand, part # 14-959-35C) equipped with a magnetic stir bar was capped with a Teflon/silicone septum (Thermo/National part # C4015-66A) screw cap and flame dried under vacuum. The reaction tube was cooled under argon and transferred into an argon-filled glovebox. In the glovebox, [Cp\*Fe(CO)<sub>2</sub>(thf)]<sup>+</sup>[BF<sub>4</sub>]<sup>-</sup> (12.2 mg, 10 mol%), Ph<sub>3</sub>C<sup>+</sup>BF<sub>4</sub><sup>-</sup> (150 mg, 0.45 mmol, 1.5 equiv.), dry 1,2-dichloroethane (0.6 mL), alkyne **1** (0.3 mmol, 1.0 equiv) and 2,4,6-



collidine (60  $\mu$ L, 0.45 mmol, 1.5 equiv) were added in rapid succession. The reaction tube was capped and removed from the glovebox. The reaction tube was placed in an oil bath, preheated to 60  $^{\circ}$ C, where it was stirred for 48 h. After completion of the reaction, the reaction mixture was cooled to room temperature. The crude mixture was concentrated *in vacuo* and purified by flash column chromatography to provide the desired product.

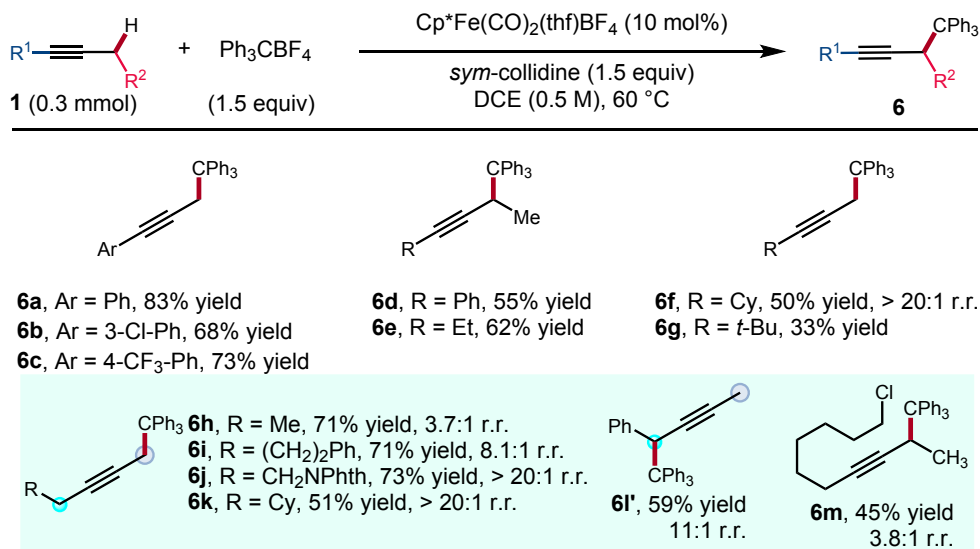

## Characterization data for products 6:

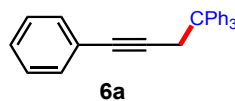

**But-3-yne-1,1,1,4-tetrayltetrabenzene (6a):** Prepared following general procedure C using prop-1-yn-1-ylbenzene (**1a**, 39  $\mu$ L, 0.3 mmol, 1.0 equiv). The reaction mixture was quenched after 48 h, and the crude residue was purified by flash column chromatography, eluting with a gradient of 5 to 6.3% DCM in hexanes to provide the title compound **6a** as a white solid (86 mg, 80% yield). **m.p.** = 101–102  $^{\circ}$ C.

**<sup>1</sup>H NMR** (500 MHz, CDCl<sub>3</sub>)  $\delta$  7.22–7.16 (m, 12H), 7.16–7.10 (m, 3H), 7.10–7.04 (m, 3H), 7.01–6.92 (m, 2H), 3.61 (s, 2H).

**<sup>13</sup>C NMR** (125 MHz, CDCl<sub>3</sub>)  $\delta$  146.8, 131.3, 129.3, 128.0, 127.8, 127.5, 126.3, 123.8, 88.6, 84.3, 56.6, 33.5.

**HRMS** (ASAP) calcd for C<sub>28</sub>H<sub>23</sub> [M+H]<sup>+</sup>: 359.1800, found: 359.1812.

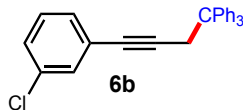

**(4-(3-chlorophenyl) but-3-yne-1,1,1-triyl) tribenzene (6b):** Prepared following general procedure C using 1-chloro-3-(prop-1-yn-1-yl) benzene (**1m**, 45 mg, 0.3 mmol, 1.0 equiv). The reaction mixture was quenched after 48 h, and the crude residue was purified by flash column chromatography, eluting with a gradient of 5 to 6.3% DCM in hexanes to provide the title compound **6b** as a white solid (80 mg, 68% yield). **m.p.** = 99–100 °C. <sup>1</sup>H NMR (500 MHz, CDCl<sub>3</sub>) δ 7.50-7.22 (m, 15H), 7.21-7.16 (m, 1H), 7.15-7.08 (m, 1H), 7.05 (s, 1H), 6.98-6.91 (m, 1H), 3.72 (s, 2H). <sup>13</sup>C NMR (125 MHz, CDCl<sub>3</sub>) δ 146.7, 133.8, 131.2, 129.4, 129.2, 127.83, 127.77, 126.4, 125.4, 90.1, 83.1, 56.6, 33.5. **HRMS** (ASAP) calcd for C<sub>28</sub>H<sub>22</sub>Cl [M+H]<sup>+</sup>: 393.1404, found: 393.1418.

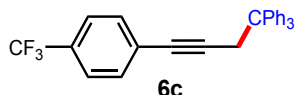

**(4-(4-(trifluoromethyl)phenyl)but-3-yne-1,1,1-triyl)tribenzene (6c):** Prepared following general procedure C using 1-(prop-1-yn-1-yl)-4-(trifluoromethyl)benzene (**1o**, 55.2 mg, 0.3 mmol, 1.0 equiv). The reaction mixture was quenched after 48 h, and the crude residue was purified by flash column chromatography, eluting with a gradient of 5 to 6.3% DCM in hexanes to provide the title compound **6c** as a white solid (93 mg, 73% yield). **m.p.** = 67–68 °C. <sup>1</sup>H NMR (500 MHz, CDCl<sub>3</sub>) δ 7.47 (d, *J* = 8.0 Hz, 2H), 7.38-7.26 (m, 15H), 7.20-7.14 (m, 2H), 3.76 (s, 2H). <sup>19</sup>F NMR (470 MHz, CDCl<sub>3</sub>, rotamers seen) δ -62.8. <sup>13</sup>C NMR (125 MHz, CDCl<sub>3</sub>) δ 146.6, 131.5, 129.2, 128.9 (q, *J*<sub>C-F</sub> = 145 Hz), 127.9, 126.9 (q, *J*<sub>C-F</sub> = 150 Hz), 126.4, 124.9 (q, *J*<sub>C-F</sub> = 3.8 Hz), 124.0 (q, *J*<sub>C-F</sub> = 262.5 Hz), 91.5, 83.3, 56.6, 33.6. **HRMS** (ASAP) calcd for C<sub>29</sub>H<sub>22</sub>CF<sub>3</sub> [M+H]<sup>+</sup>: 427.1674, found: 427.1681.

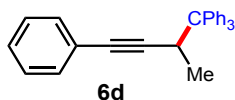

**(2-methylbut-3-yne-1,1,1,4-tetrayl) tetrabenzene (6d):** Prepared following general procedure C using but-1-yn-1-ylbenzene (**1f**, 42 μL, 0.3 mmol, 1.0 equiv). The reaction mixture was quenched after 48 h, and the crude residue was purified by flash column chromatography, eluting with a gradient of 5 to 6.3% DCM in hexanes to provide the title compound **6d** as a white solid (61 mg, 55% yield). **m.p.** = 91–92 °C. <sup>1</sup>H NMR (500 MHz, CDCl<sub>3</sub>) δ 7.47 (d, *J* = 8.0 Hz, 6H), 7.30 (t, *J* = 7.5 Hz, 6H), 7.25-7.18 (m, 6H), 7.17-7.11 (m, 2H), 4.56 (q, *J* = 7.0 Hz, 1H), 1.22 (d, *J* = 7.0 Hz, 3H). <sup>13</sup>C NMR (125 MHz, CDCl<sub>3</sub>) δ 145.2, 131.3, 130.0, 128.1, 127.44, 127.37, 126.0, 124.0, 93.3, 84.4, 61.0, 33.3, 18.2. **HRMS** (ASAP) calcd for C<sub>29</sub>H<sub>25</sub> [M+H]<sup>+</sup>: 373.1956, found: 373.1977.

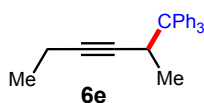

**(2-methylhex-3-yn-1,1,1-triyl)tribenzene (6e):** Prepared following general procedure C using 3-hexyne (**1l**, 33  $\mu$ L, 0.3 mmol, 1.0 equiv). The reaction mixture was quenched after 48 h, and the crude residue was purified by flash column chromatography (Hexanes) to provide the title compound **6e** as a colorless liquid (61 mg, 62% yield).

$^1\text{H NMR}$  (400 MHz,  $\text{CDCl}_3$ )  $\delta$  7.50-7.36 (m, 6H), 7.34-7.25 (m, 6H), 7.25-7.16 (m, 3H), 4.33 (qt,  $J = 6.8, 2.0$  Hz, 1H), 2.02 (qd,  $J = 7.6, 2.0$  Hz, 2H), 1.11 (d,  $J = 6.8$  Hz, 3H), 0.93 (t,  $J = 7.6$  Hz, 3H).

$^{13}\text{C NMR}$  (100 MHz,  $\text{CDCl}_3$ )  $\delta$  145.3, 130.0, 127.3, 125.8, 85.6, 82.5, 60.8, 32.4, 18.5, 13.9, 12.5.

**HRMS** (ESI) calcd for  $\text{C}_{25}\text{H}_{25}$   $[\text{M}+\text{H}]^+$ : 325.1951, found: 325.1963.

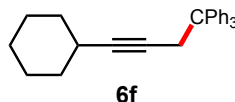

**(4-cyclohexylbut-3-yn-1,1,1-triyl)tribenzene (6f):** Prepared following general procedure C using prop-1-yn-1-ylcyclohexane (**1i**, 36.6 mg, 0.3 mmol, 1.0 equiv). The reaction mixture was quenched after 48 h, and the crude residue was purified by flash column chromatography, eluting with a gradient of 5 to 6.3% DCM in hexanes to provide the title compound **6f** as a colorless liquid (55 mg, 50% yield, >20:1 r.r.).

$^1\text{H NMR}$  (400 MHz,  $\text{CDCl}_3$ )  $\delta$  7.38-7.19 (m, 15H), 3.50 (d,  $J = 2.0$  Hz, 2H), 2.24 (s, 1H), 1.55-1.33 (m, 5H), 1.27-1.08 (m, 5H).

$^{13}\text{C NMR}$  (100 MHz,  $\text{CDCl}_3$ )  $\delta$  147.1, 129.4, 127.7, 126.1, 88.3, 78.7, 56.4, 32.9, 32.3, 28.7, 26.0, 24.3.

**HRMS** (ASAP) calcd for  $\text{C}_{28}\text{H}_{29}$   $[\text{M}+\text{H}]^+$ : 365.2269, found: 365.2289.

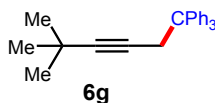

**(5,5-dimethylhex-3-yn-1,1,1-triyl)tribenzene (6g):** Prepared following general procedure C using 4,4-dimethylpent-2-yne (**1r**, 40  $\mu$ L, 0.3 mmol, 1.0 equiv). The reaction mixture was quenched after 48 h, and the crude residue was purified by flash column chromatography, eluting with a gradient of 5 to 6.3% DCM in hexanes to provide the title compound **6g** as a colorless liquid (34 mg, 33% yield).

$^1\text{H NMR}$  (500 MHz,  $\text{CDCl}_3$ )  $\delta$  7.31-7.20 (m, 15H), 3.44 (s, 2H), 0.96 (s, 9H).

$^{13}\text{C NMR}$  (125 MHz,  $\text{CDCl}_3$ )  $\delta$  147.1, 129.4, 127.6, 126.1, 100.0, 92.9, 56.5, 32.8, 30.7, 27.2.

**HRMS** (ASAP) calcd for  $\text{C}_{26}\text{H}_{27}$   $[\text{M}+\text{H}]^+$ : 339.2113, found: 339.2131.

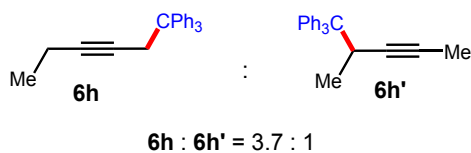

Prepared following general procedure C using pent-2-yne (**1p**, 29  $\mu$ L, 0.3 mmol, 1.0 equiv). The reaction mixture was quenched after 48 h, and the crude residue was purified by flash column chromatography, eluting with a gradient of 5 to 6.3% DCM in hexanes to provide the title compound **6h** and **6h'** as a colorless oil (66 mg, 71% yield, 3.7:1 r.r.). The regioisomeric ratio was determined by  $^1\text{H}$  NMR of the crude material.

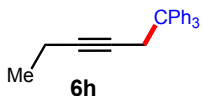

**hex-3-yne-1,1,1-triyltribenzene (6h):**

$^1\text{H}$  NMR (400 MHz,  $\text{CDCl}_3$ )  $\delta$  7.38-7.18 (m, 15H), 3.49 (t,  $J = 2.4$  Hz, 2H), 2.00 (qt,  $J = 7.6, 2.4$  Hz, 2H), 0.90 (t,  $J = 7.6$  Hz, 3H).

$^{13}\text{C}$  NMR (100 MHz,  $\text{CDCl}_3$ )  $\delta$  147.1, 129.4, 127.7, 126.1, 85.6, 77.9, 56.4, 32.8, 13.9, 12.4.

HRMS (ESI) calcd for  $\text{C}_{24}\text{H}_{22}$   $[\text{M}+\text{H}]^+$ : 311.1794, found: 311.1804.

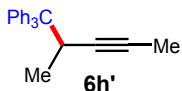

**(2-methylpent-3-yne-1,1,1-triyl)tribenzene (6h'):**

$^1\text{H}$  NMR (400 MHz,  $\text{CDCl}_3$ )  $\delta$  7.45-7.35 (m, 5H), 7.30-7.12 (m, 10H), 4.37-4.20 (m, 1H), 1.70-1.55 (m, 3H), 1.08 (d,  $J = 6.8$  Hz, 3H).

$^{13}\text{C}$  NMR (100 MHz,  $\text{CDCl}_3$ )  $\delta$  145.5, 129.9, 127.3, 125.8, 81.9, 79.6, 60.8, 32.3, 18.5, 3.6.

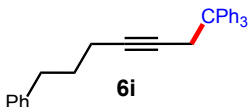

**Hept-3-yne-1,1,1,7-tetrayltetrabenzene (6i):** Prepared following general procedure C using hex-4-yn-1-ylbenzene (**1j**, 47 mg, 0.3 mmol, 1.0 equiv). The reaction mixture was quenched after 48 h, and the crude residue was purified by flash column chromatography, eluting with a gradient of 5 to 6.3% DCM in hexanes to provide the title compound **6i** as a colorless oil (85 mg, 71% yield, 8.1:1 r.r.). The regioisomeric ratio was determined by  $^1\text{H}$  NMR of the crude material.

$^1\text{H}$  NMR (400 MHz,  $\text{CDCl}_3$ )  $\delta$  7.35-7.24 (m, 18H), 7.08-7.03 (m, 2H), 3.55 (t,  $J = 2.4$  Hz, 2H), 2.44 (t,  $J = 7.6$  Hz, 2H), 2.07-1.98 (m, 2H), 1.63-1.53 (m, 2H).

$^{13}\text{C}$  NMR (100 MHz,  $\text{CDCl}_3$ )  $\delta$  147.1, 141.9, 129.4, 128.6, 128.2, 127.8, 126.2, 125.7, 83.6, 79.1, 56.4, 34.3, 32.9, 30.2, 18.0.

HRMS (ESI) calcd for C<sub>31</sub>H<sub>29</sub> [M+H]<sup>+</sup>: 401.2264, found: 401.2278.

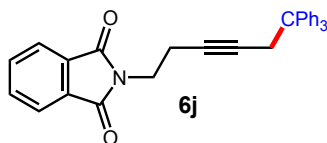

**2-(6,6,6-triphenylhex-3-yn-1-yl) isoindoline-1,3-dione (6j):** Prepared following general procedure C using 2-(pent-3-yn-1-yl)isoindoline-1,3-dione (**1g**, 64 mg, 0.3 mmol, 1.0 equiv). The reaction mixture was quenched after 48 h, and the crude residue was purified by flash column chromatography, eluting with a gradient of 6 to 12% ethyl acetate in hexanes to provide the title compound **6j** as a light-yellow solid (100 mg, 73% yield, >20:1 r.r.). The regioisomeric ratio was determined by <sup>1</sup>H NMR of the crude material. **m.p.** = 158-159 °C.

<sup>1</sup>H NMR (400 MHz, CDCl<sub>3</sub>) δ 7.90-7.80 (m, 2H), 7.78-7.68 (m, 2H), 7.38-7.08 (m, 15H), 3.58 (t, *J* = 7.6 Hz, 2H), 3.45 (t, *J* = 2.4 Hz, 2H), 2.48-2.32 (m, 2H).

<sup>13</sup>C NMR (100 MHz, CDCl<sub>3</sub>) δ 167.9, 146.8, 133.9, 132.1, 129.2, 127.7, 126.2, 123.3, 80.5, 79.8, 56.2, 36.8, 32.8, 18.6.

HRMS (ESI) calcd for C<sub>32</sub>H<sub>26</sub>O<sub>2</sub>N [M+H]<sup>+</sup>: 456.1958, found: 456.1955.

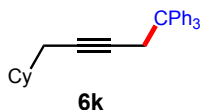

**(5-cyclohexylpent-3-yn-1,1,1-triyl)tribenzene (6k):** Prepared following general procedure C using but-2-yn-1-ylcyclohexane (**1q**, 40.8 mg, 0.3 mmol, 1.0 equiv). The reaction mixture was quenched after 48 h, and the crude residue was purified by flash column chromatography, eluting with a gradient of 5 to 6.3% DCM in hexanes to provide the title compound **6k** as a colorless oil (58 mg, 51% yield, >20:1 r.r.).

<sup>1</sup>H NMR (400 MHz, CDCl<sub>3</sub>) δ 7.25-7.05 (m, 15H), 3.39 (t, *J* = 2.4 Hz, 2H), 1.82-1.72 (m, 2H), 1.54-1.44 (m, 3H), 1.38-1.28 (m, 2H), 1.12-0.88 (m, 4H), 0.70-0.54 (m, 2H).

<sup>13</sup>C NMR (100 MHz, CDCl<sub>3</sub>) δ 147.1, 129.3, 127.7, 126.1, 82.9, 79.2, 56.3, 37.4, 32.9, 32.3, 26.6, 26.2.

HRMS (ESI) calcd for C<sub>29</sub>H<sub>31</sub> [M+H]<sup>+</sup>: 379.2420, found: 379.2432.

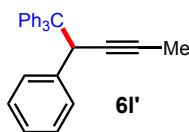

**Pent-3-yn-1,1,1,2-tetrayltetrabenzene (6l')**: Prepared following general procedure A using but-2-yn-1-ylbenzene (**1s**, 39 mg, 0.3 mmol, 1.0 equiv). The reaction mixture was quenched after 48 h, and the crude residue was purified by flash column chromatography, eluting with a gradient of 5 to 6.3% DCM in hexanes to provide the title compound **6l'** as

a white solid (66 mg, 59% yield, 1:11 r.r.). The regioisomeric ratio was determined by  $^1\text{H}$  NMR of the crude material. **m.p.** = 173-174 °C.

$^1\text{H}$  NMR (400 MHz,  $\text{CDCl}_3$ )  $\delta$  7.50-7.33 (m, 6H), 7.28-7.15 (m, 9H), 7.15-7.08 (m, 1 H), 7.07-6.95 (m, 2H), 6.93-6.75 (m, 2H), 5.49 (s, 1H), 1.73 (d,  $J$  = 1.6 Hz, 3H).

$^{13}\text{C}$  NMR (100 MHz,  $\text{CDCl}_3$ )  $\delta$  144.7, 138.8, 131.3, 130.8, 127.0, 126.8, 126.7, 125.9, 82.4, 80.4, 63.6, 45.1, 3.7.

HRMS (ESI) calcd for  $\text{C}_{29}\text{H}_{25}$   $[\text{M}+\text{H}]^+$ : 373.1951, found: 373.1959.

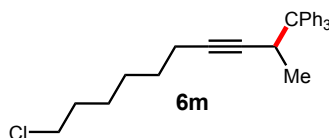

**(10-chloro-2-methyldec-3-yn-1,1,1-triyl) tribenzene (6m)**: Prepared following general procedure C using 10-chlorodec-3-yne (**1t**, 57  $\mu\text{L}$ , 0.3 mmol, 1.0 equiv). The reaction mixture was quenched after 48 h, and the crude residue was purified by flash column chromatography, eluting with a gradient of 5 to 6.3% DCM in hexanes to provide the title compound **6m** as a colorless oil (56 mg, 45% yield, 3.8:1 r.r.). The regioisomeric ratio was determined by  $^1\text{H}$  NMR of the crude material.

$^1\text{H}$  NMR (500 MHz,  $\text{CDCl}_3$ )  $\delta$  7.48-7.38 (m, 6H), 7.33-7.28 (m, 6H), 7.25-7.19 (m, 3H), 4.42-4.29 (m, 1H), 3.59-3.49 (m, 2H), 2.05 (td,  $J$  = 7.0, 2.0 Hz, 2H), 1.78-1.67 (m, 2H), 1.40-1.26 (m, 4H), 1.22-1.14 (m, 2H), 1.11 (d,  $J$  = 6.5 Hz, 3H).

$^{13}\text{C}$  NMR (100 MHz,  $\text{CDCl}_3$ )  $\delta$  146.2, 130.2, 127.3, 125.8, 83.9, 83.3, 60.7, 45.0, 32.5, 28.4, 27.7, 26.4, 18.6, 18.5.

HRMS (ASAP) calcd for  $\text{C}_{29}\text{H}_{32}\text{Cl}$   $[\text{M}+\text{H}]^+$ : 415.2193, found: 415.2212.

## Additional stoichiometric functionalization experiments

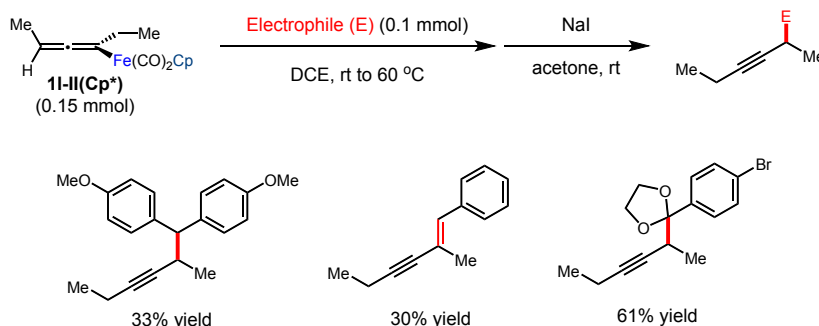

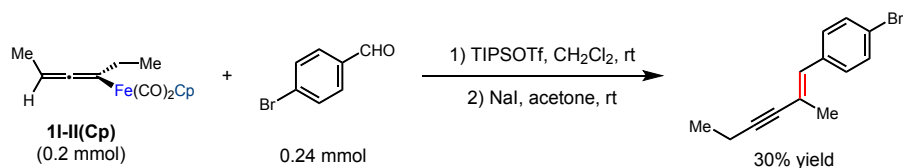

A reaction tube equipped with a magnetic stir bar was capped with a Teflon/silicone septum screw cap and flame dried under vacuum. The solution of **11-II(Cp)** (approx. 0.2 mmol) in  $\text{CH}_2\text{Cl}_2$  (2 mL) was added dropwise to a stirred solution of 4-bromobenzaldehyde (40 mg, 0.24 mmol, 1.2 equiv) and triisopropylsilyl trifluoromethanesulfonate (TIPSOTf, 64  $\mu\text{L}$ , 0.24 mmol, 1.2 equiv) in  $\text{CH}_2\text{Cl}_2$  (2 mL). The reaction mixture was stirred at rt for 1 h. Then acetone (2 mL) and sodium iodide (30 mg, 0.2 mmol) were added in succession, and stirred at rt for another 10 min. The crude mixture was concentrated *in vacuo* and purified by preparative thin-layer chromatography to provide the desired product.

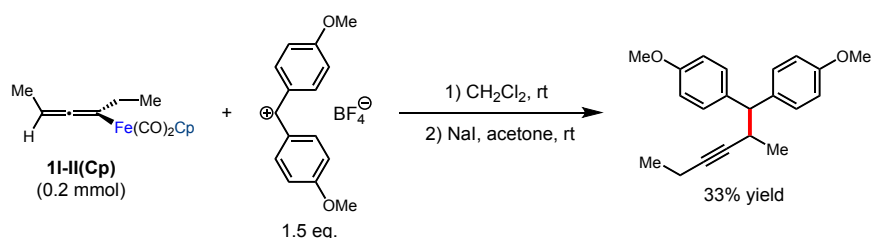

A reaction tube equipped with a magnetic stir bar was capped with a Teflon/silicone septum screw cap and flame dried under vacuum. The solution of **11-II(Cp)** (approx. 0.2 mmol) in  $\text{CH}_2\text{Cl}_2$  (2 mL) was added dropwise to a stirred solution of 4,4'-bis(dimethoxy)benzhydrylium tetrafluoroborate (68 mg, 0.3 mmol, 1.5 equiv) in  $\text{CH}_2\text{Cl}_2$  (1 mL) at rt for 1 h. Acetone (2 mL) and sodium iodide (30 mg, 0.2 mmol) were then added in succession, and stirred at rt for another 10 min. The crude mixture was concentrated *in vacuo* and purified by preparative thin-layer chromatography to provide the desired product.

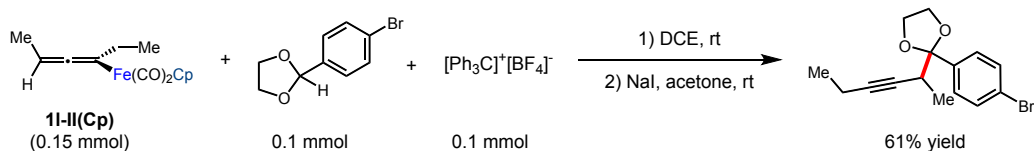

A reaction tube equipped with a magnetic stir bar was capped with a Teflon/silicone septum screw cap and flame dried under vacuum. The reaction tube was cooled under argon and transferred into a nitrogen-filled glovebox. In the glovebox, the suspension of 2-(4-bromophenyl)-1,3-dioxolane (23 mg, 0.1 mmol) and  $\text{Ph}_3\text{C}^+\text{BF}_4^-$  (33 mg, 0.1 mmol) in dry 1,2-dichloroethane (1 mL) was stirred at room temperature for 3 hours. Then the solution of **11-II(Cp)** (approx. 0.15 mmol) in 1,2-dichloroethane (1 mL) was added dropwise at rt, and the reaction mixture was stirred at 60  $^\circ\text{C}$  for 2 h. Subsequently, acetone (2 mL) and sodium iodide (30 mg, 0.2 mmol) were added in succession, and

stirred at rt for another 10 min. The crude mixture was concentrated *in vacuo* and purified by preparative thin-layer chromatography to provide the desired product.

## Synthesis of substrates and characterization data for new compounds:

The alkyne substrates are list as following:

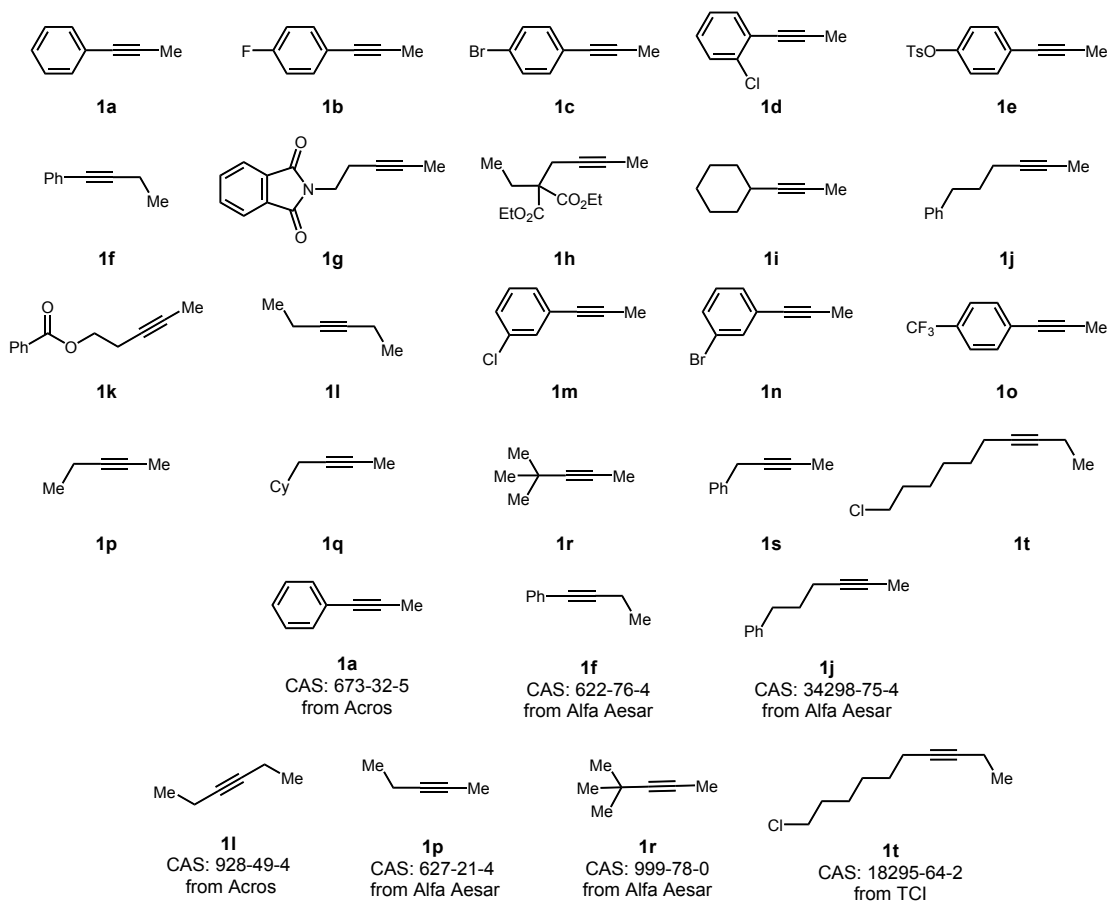

The alkynes **1a**, **1f**, **1j**, **1l**, **1p**, **1r**, **1s** are commercial, and used directly without purification.

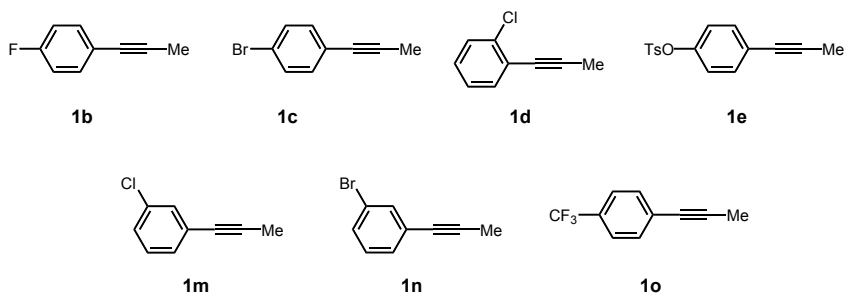

The alkynes were synthesized according to a known literature procedure and has been previously characterized.<sup>5</sup>



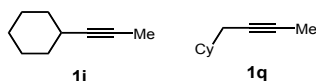

The alkynes were synthesized according to a known literature procedure and has been previously characterized.<sup>6</sup>

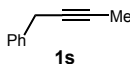

The alkyne was synthesized according to a known literature procedure and has been previously characterized.<sup>7</sup>

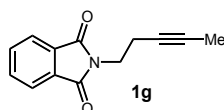

The alkyne was synthesized according to a known literature procedure and has been previously characterized.<sup>8</sup>

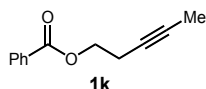

The alkyne was synthesized according to a known literature procedure and has been previously characterized.<sup>9</sup>

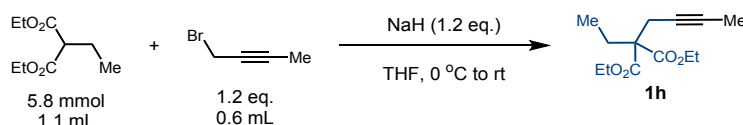

The diethyl 2-ethylmalonate (1.1 mL, 5.8 mmol) was added to the suspension of NaH (278 mg, 1.2 equiv) in THF (12 mL) at 0 °C. The mixture was stirred at room temperature for 0.5 h. Then 1-bromobut-2-yne (0.6 mL, 1.2 equiv) was added to the above suspension dropwise, stirred at room temperature for another 1 h. After completion, quenched with saturated  $\text{NH}_4\text{Cl}$  solution, extracted with ethyl acetate for three times. The combined organic solution was washed with brine, dried ( $\text{Na}_2\text{SO}_4$ ), filtered, and concentrated under reduced pressure. Purification by column chromatography (10% - 20% ethyl acetate in hexanes) afforded the product as colorless liquid (1.27 g, 91% yield).

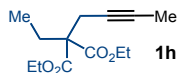

#### Diethyl 2-(but-2-yn-1-yl)-2-ethylmalonate (**1h**).

$^1\text{H NMR}$  (400 MHz,  $\text{CDCl}_3$ )  $\delta$  4.25-4.12 (m, 4H), 2.77-2.68 (m, 2H), 2.12-2.00 (m, 2H), 1.78-1.68 (m, 3H), 1.30-1.17 (m, 6H), 0.88-0.77 (m, 3H).

$^{13}\text{C NMR}$  (100 MHz,  $\text{CDCl}_3$ )  $\delta$  170.6, 78.3, 73.5, 61.2, 57.5, 24.9, 22.4, 14.0, 8.3, 3.4.

HRMS (ESI) calcd for  $\text{C}_{13}\text{H}_{21}\text{O}_4$   $[\text{M}+\text{H}]^+$ : 241.1434, found: 241.1439.

## Synthesis of carbamates.

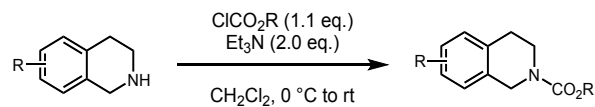

The *N*-carbamate starting materials **2a-2g** were synthesized according to the corresponding literatures<sup>10</sup> and has been previously characterized.

The chloroformate (1.1 equiv) was added dropwise to the solution of tetrahydroisoquinolines (1.0 equiv) and  $\text{Et}_3\text{N}$  (2.0 equiv) in  $\text{CH}_2\text{Cl}_2$  (0.25 M) at 0 °C. The mixture was stirred at room temperature for 2 h. After completion, quenched with saturated  $\text{NH}_4\text{Cl}$  solution, extracted with  $\text{CH}_2\text{Cl}_2$  for three times. The combined organic solution was washed with brine, dried ( $\text{Na}_2\text{SO}_4$ ), filtered, and concentrated under reduced pressure. Purification by column chromatography (10% - 20% ethyl acetate in hexanes) afforded the product.

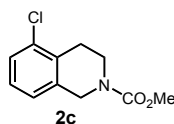

**$^1\text{H}$  NMR** (500 MHz,  $\text{CDCl}_3$ )  $\delta$  7.14 (d,  $J = 8.0$  Hz, 1H), 7.03 (t,  $J = 8.0$  Hz, 1H), 6.92 (s, 1H), 4.52 (s, 2H), 3.66 (s, 3H), 3.62 (s, 2H), 2.78 (t,  $J = 5.5$  Hz, 2H);

**$^{13}\text{C}$  NMR** (125 MHz,  $\text{CDCl}_3$ )  $\delta$  155.9, 135.6, 134.3, 132.5, 127.2, 127.1, 124.7, 52.7, 45.7, 41.1, 26.6;

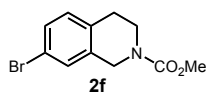

**$^1\text{H}$  NMR** (400 MHz,  $\text{CDCl}_3$ )  $\delta$  7.25-7.05 (m, 2H), 6.91 (d,  $J = 8.0$  Hz, 1H), 4.49 (s, 2H), 3.66 (s, 3H), 3.58 (s, 2H), 2.69 (t,  $J = 4.8$  Hz, 2H);

**$^{13}\text{C}$  NMR** (100 MHz,  $\text{CDCl}_3$ )  $\delta$  156.0, 135.3, 133.5, 130.4, 129.6, 129.1, 119.8, 52.8, 45.3, 41.4, 28.3;

## Reference

1. Reger, D. L.; Coleman, C. J. and McElligott, P. J. *J. Organomet. Chem.*, **1979**, *171*, 73.
2. Akita, M.; Kakuta, S.; Sugimoto, S.; Terada, M.; Tanaka, M.; Moro-oka, Y. *Organometallics*, **2001**, *20*, 2736.
3. Reger, D. L.; Coeman, C. J. *J. Organomet. Chem.*, **1977**, *131*, 153.
4. Akita, H.; Terada, M.; Tanaka, M.; Morooka, Y. *J. Organomet. Chem.*, **1996**, *510*, 255.
5. Suero, M. G.; Bayle, E. D.; Collins, B. S. L.; Gaunt, M. J. *J. Am. Chem. Soc.* **2013**, *135*, 5332.
6. Mulzer, M.; Coates, G. W. *J. Org. Chem.*, **2014**, *79*, 11851.
7. Tan, E. H. P.; Lloyd-Jones, G. C.; Harvey, J. N.; Lennox, A. J. J.; Mills, B. M. *Angew. Chem. Int. Ed.* **2011**, *50*, 9602.
8. Beck, T. M.; Breit, B. *Eur. J. Org. Chem.* **2016**, 5839.
9. Dipl.-Chem, B. H.; Wu, X.; Brandhorst, K.; Priv.-Doz. J. G.; Daniliuc, C. G.; Jones, P. G.; Tamm, M. *Chem. Eur. J.* **2010**, *16*, 8868.
10. Strokker, G. E. *Tetrahedron Lett.* **1996**, *37*, 5453.

## X-ray structures for products 3ab and 6d.

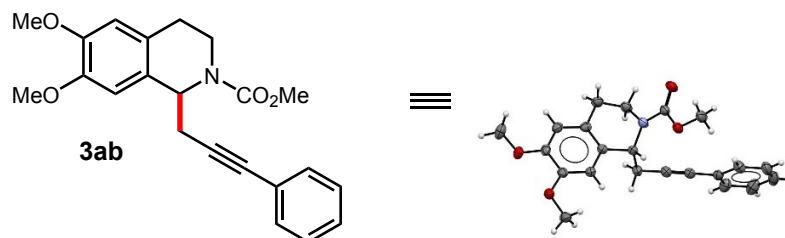

Figure S2. Molecular structure of 3ab (CCDC 1909840)

### Datablock: wyd2\_282

---

Bond precision: C-C = 0.0024 Å                      Wavelength=1.54178

Cell:                      a=17.0265 (10)              b=14.1187 (8)              c=8.9890 (5)  
                                        alpha=90                      beta=118.511 (2)              gamma=90

Temperature:              150 K

|                        | Calculated   | Reported     |
|------------------------|--------------|--------------|
| Volume                 | 1898.82 (19) | 1898.82 (19) |
| Space group            | C c          | C c          |
| Hall group             | C -2yc       | C -2yc       |
| Moiety formula         | C22 H23 N O4 | ?            |
| Sum formula            | C22 H23 N O4 | C22 H23 N O4 |
| Mr                     | 365.41       | 365.41       |
| Dx, g cm <sup>-3</sup> | 1.278        | 1.278        |
| Z                      | 4            | 4            |
| Mu (mm <sup>-1</sup> ) | 0.712        | 0.712        |
| F000                   | 776.0        | 776.0        |
| F000'                  | 778.40       |              |
| h, k, lmax             | 20, 17, 10   | 20, 17, 10   |
| Nref                   | 3606 [ 1807] | 3528         |
| Tmin, Tmax             | 0.855, 0.918 | 0.840, 0.920 |
| Tmin'                  | 0.855        |              |

Correction method= # Reported T Limits: Tmin=0.840 Tmax=0.920  
AbsCorr = MULTI-SCAN

Data completeness= 1.95/0.98                      Theta(max) = 70.057

R(reflections)= 0.0257 ( 3509)                      wR2(reflections)= 0.0773 ( 3528)

S = 1.074                                              Npar= 247

---

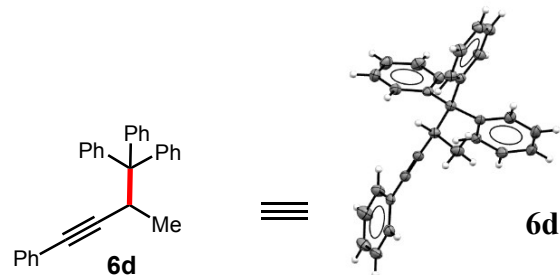

Figure S1. Molecular structure of 6d (CCDC 1909839)

Datablock: Yidong1\_a

---

|                                                               |                |                                 |              |
|---------------------------------------------------------------|----------------|---------------------------------|--------------|
| Bond precision:                                               | C-C = 0.0019 Å | Wavelength=1.54178              |              |
| Cell:                                                         | a=9.6092 (4)   | b=24.7359 (10)                  | c=9.7874 (4) |
|                                                               | alpha=90       | beta=116.350 (2)                | gamma=90     |
| Temperature:                                                  | 150 K          |                                 |              |
|                                                               | Calculated     | Reported                        |              |
| Volume                                                        | 2084.68 (15)   | 2084.67 (15)                    |              |
| Space group                                                   | P 21/c         | P 21/c                          |              |
| Hall group                                                    | : -P 2ybc      | -P 2ybc                         |              |
| Moiety formula                                                | C29 H24        | ?                               |              |
| Sum formula                                                   | C29 H24        | C29 H24                         |              |
| Mr                                                            | 372.48         | 372.48                          |              |
| Dx,g cm-3                                                     | 1.187          | 1.187                           |              |
| Z                                                             | 4              | 4                               |              |
| Mu (mm-1)                                                     | 0.503          | 0.503                           |              |
| F000                                                          | 792.0          | 792.0                           |              |
| F000'                                                         | 794.00         |                                 |              |
| h,k,lmax                                                      | 11,29,11       | 11,29,11                        |              |
| Nref                                                          | 3820           | 3689                            |              |
| Tmin,Tmax                                                     | 0.947,0.980    | 0.920,0.980                     |              |
| Tmin'                                                         | 0.913          |                                 |              |
| Correction method= # Reported T Limits: Tmin=0.920 Tmax=0.980 |                |                                 |              |
| AbsCorr = MULTI-SCAN                                          |                |                                 |              |
| Data completeness=                                            | 0.966          | Theta(max) = 68.240             |              |
| R(reflections)=                                               | 0.0366( 3093)  | wR2(reflections)= 0.1116( 3689) |              |
| S =                                                           | 1.093          | Npar= 263                       |              |

---

Copies of  $^1\text{H}$  and  $^{13}\text{C}$  NMR spectra for catalyst, products and substrates.

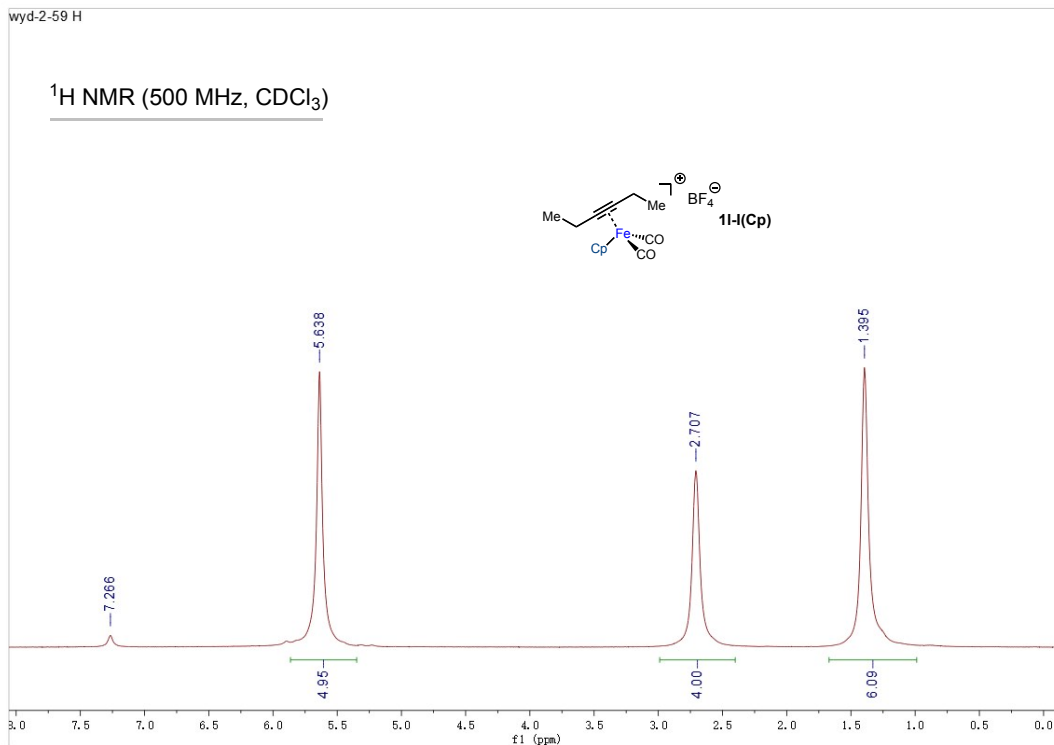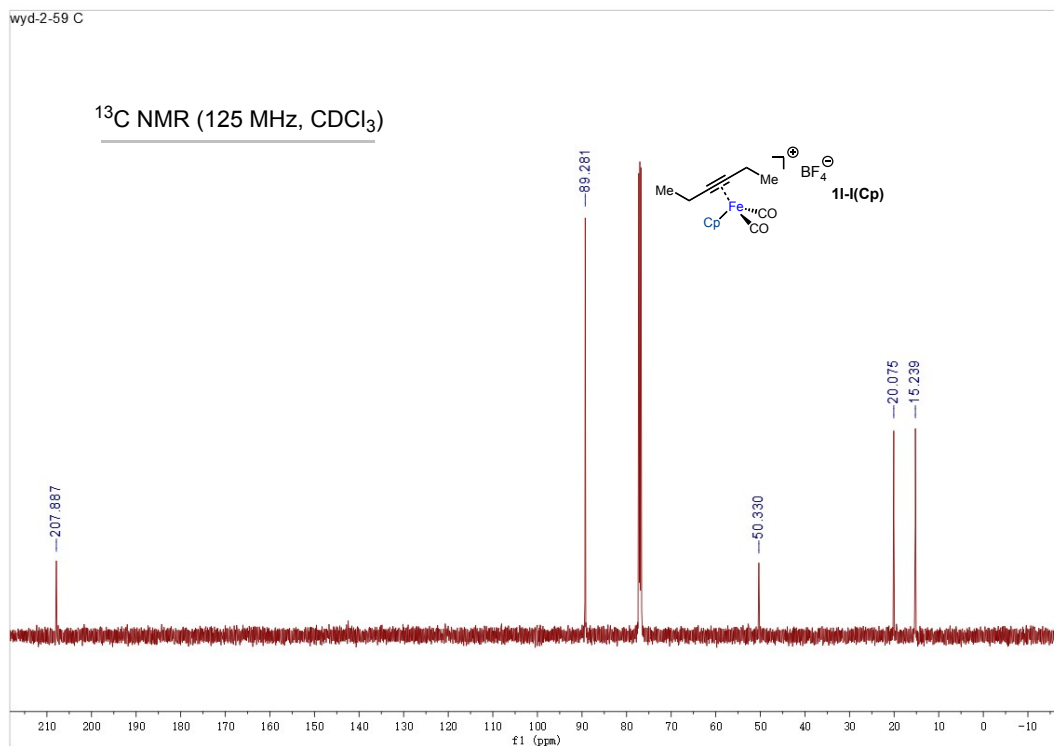

wyd-2-59 F

$^{19}\text{F}$  NMR (470 MHz,  $\text{CDCl}_3$ )

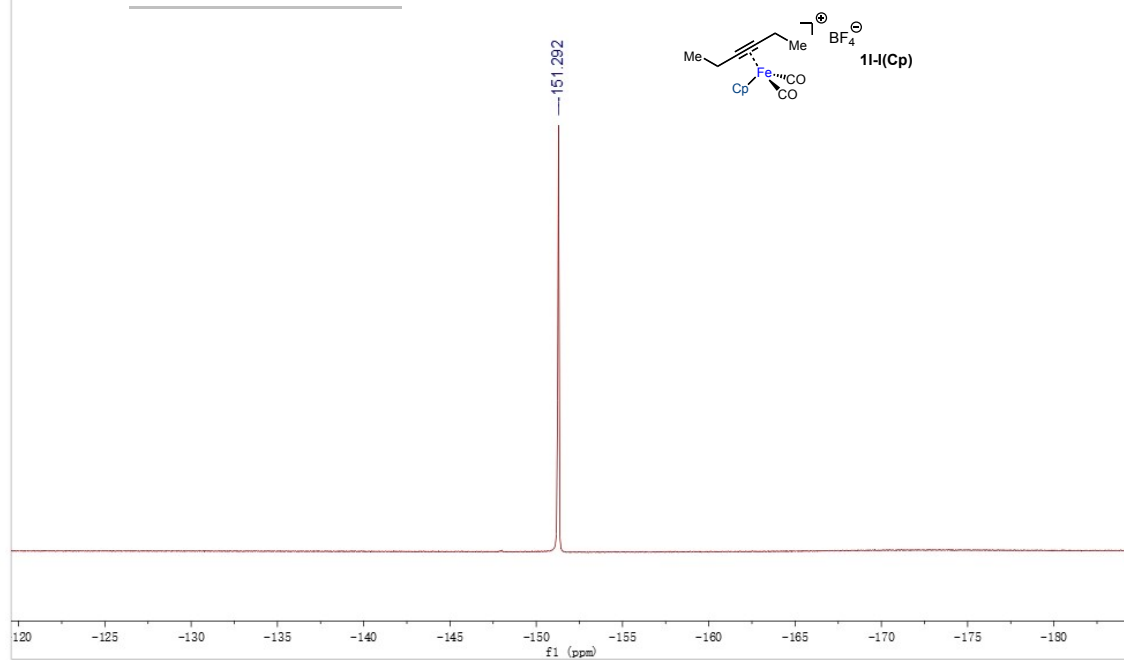

wyd-3-73 CD2Cl2

$^1\text{H}$  NMR (400 MHz,  $\text{CD}_2\text{Cl}_2$ )

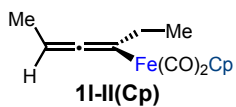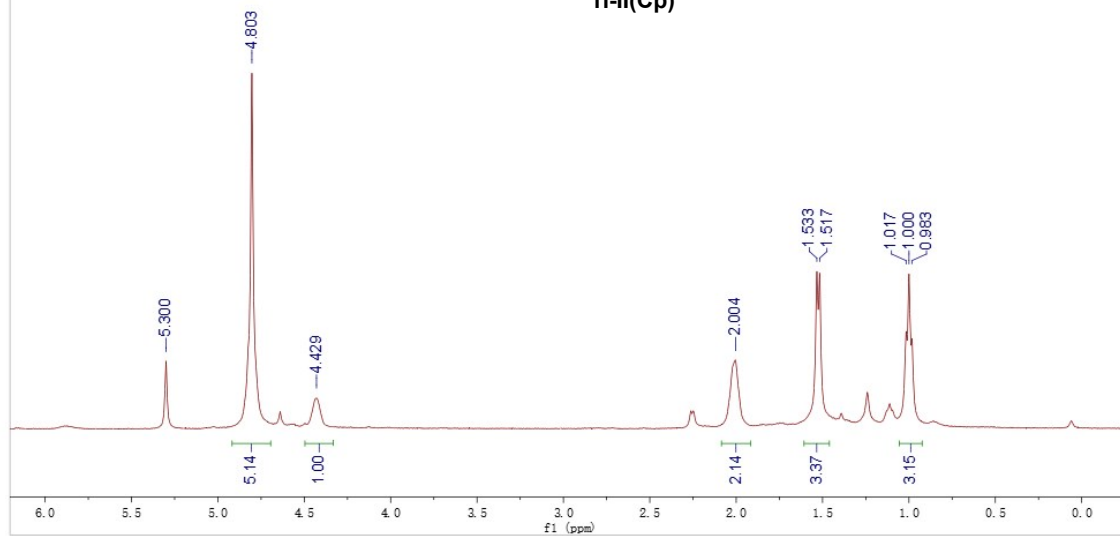

wyd-3-73 C CD2Cl2

$^{13}\text{C}$  NMR (100 MHz,  $\text{CD}_2\text{Cl}_2$ )

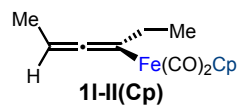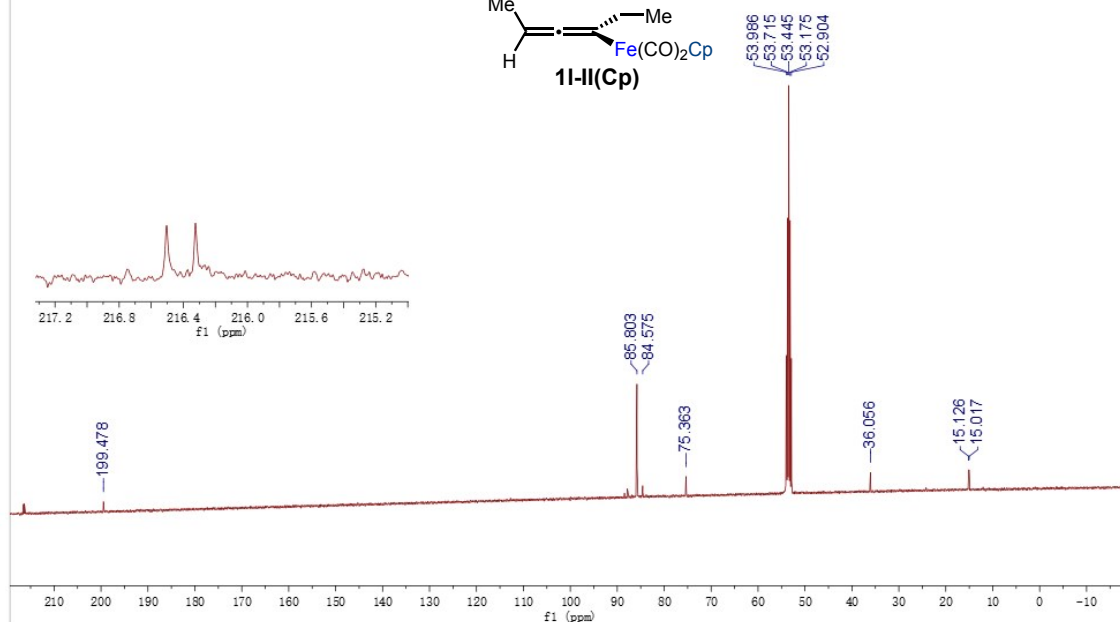



wyd-2-119 H

$^1\text{H}$  NMR (400 MHz,  $\text{CD}_2\text{Cl}_2$ )

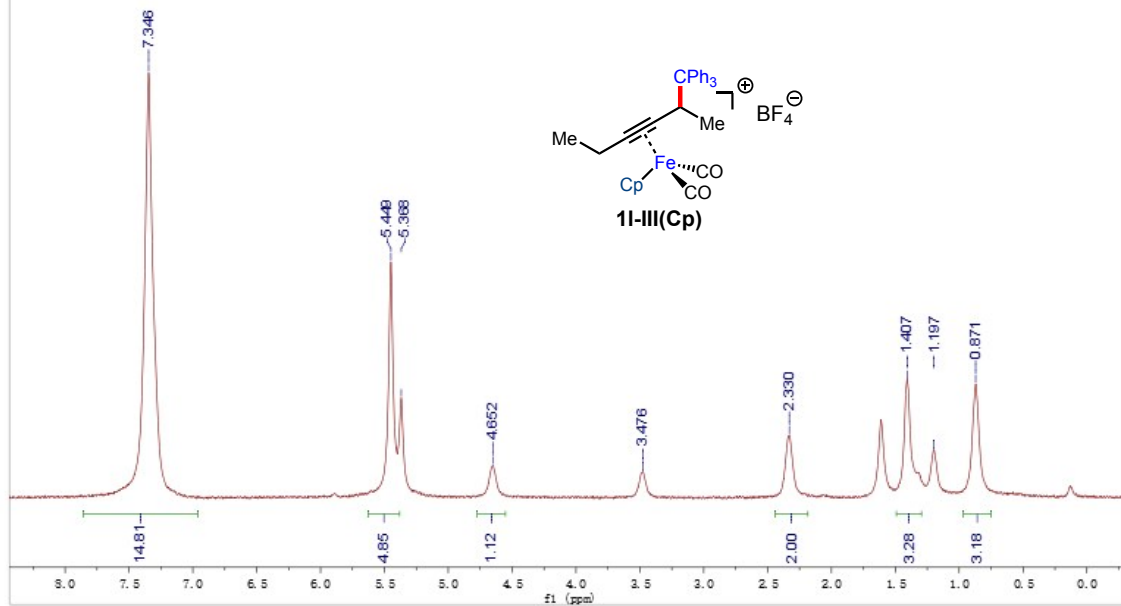

wyd-1-168 H

$^1\text{H}$  NMR (500 MHz,  $\text{CDCl}_3$ )

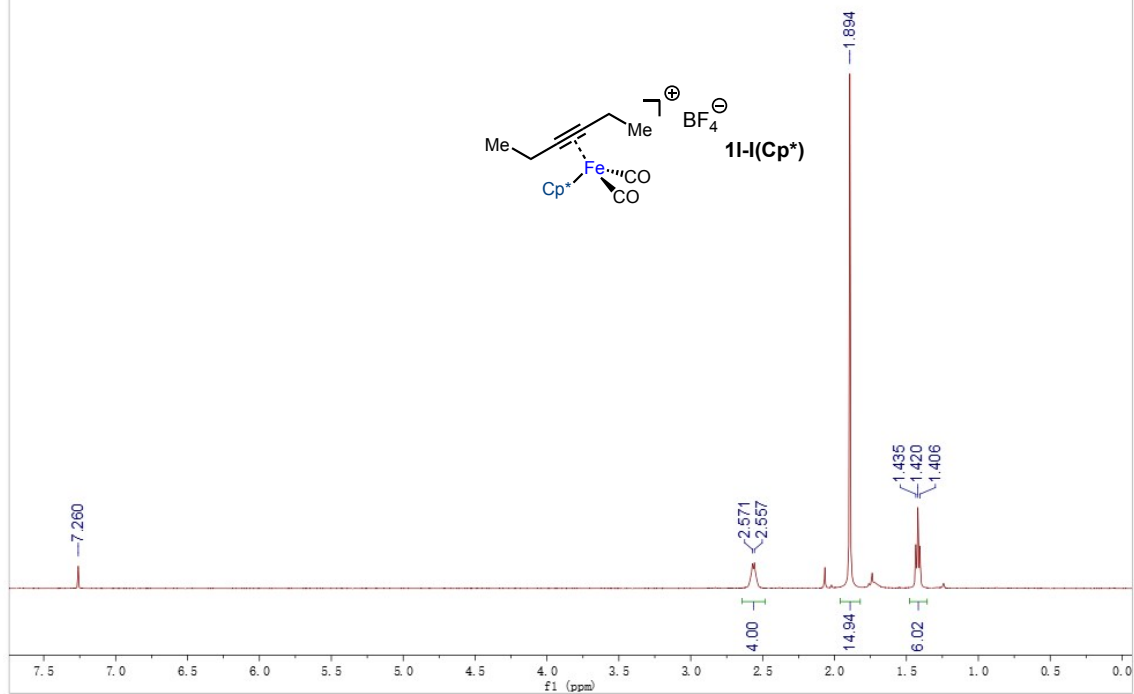

wyd-1-168 C

$^{13}\text{C}$  NMR (125 MHz,  $\text{CDCl}_3$ )

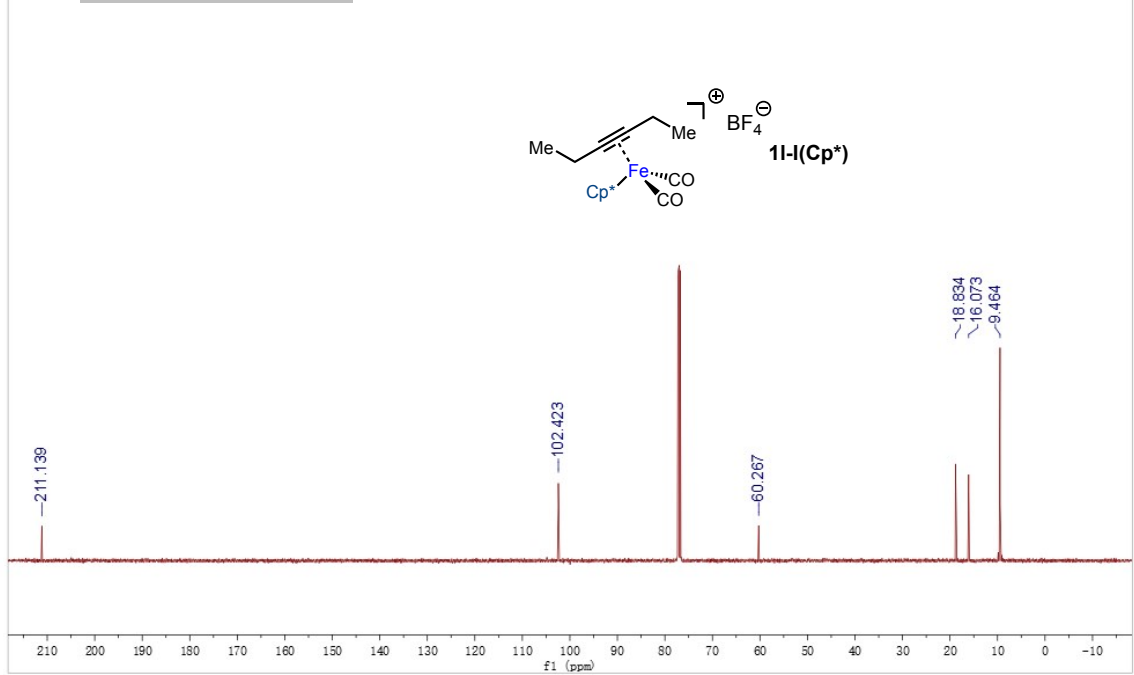

wyd-1-168 F

$^{19}\text{F}$  NMR (470 MHz,  $\text{CDCl}_3$ )

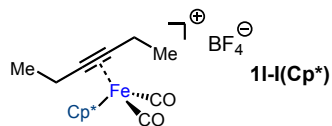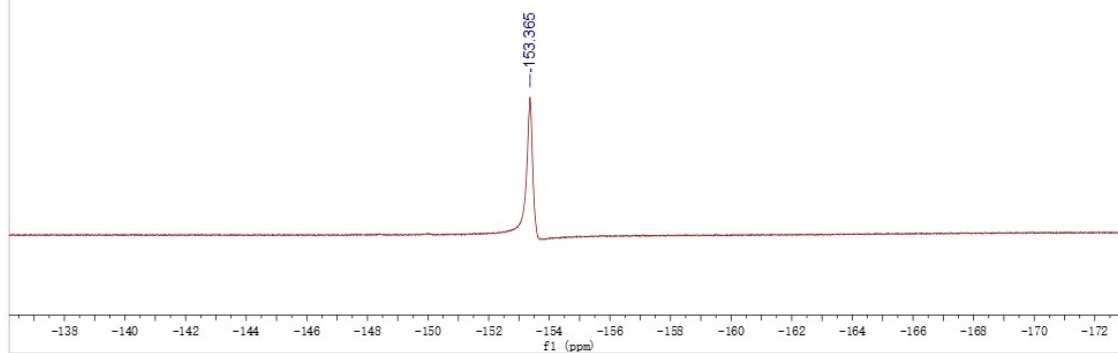

wyd-3-89-c H

$^1\text{H}$  NMR (400 MHz,  $\text{CD}_2\text{Cl}_2$ )

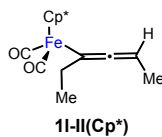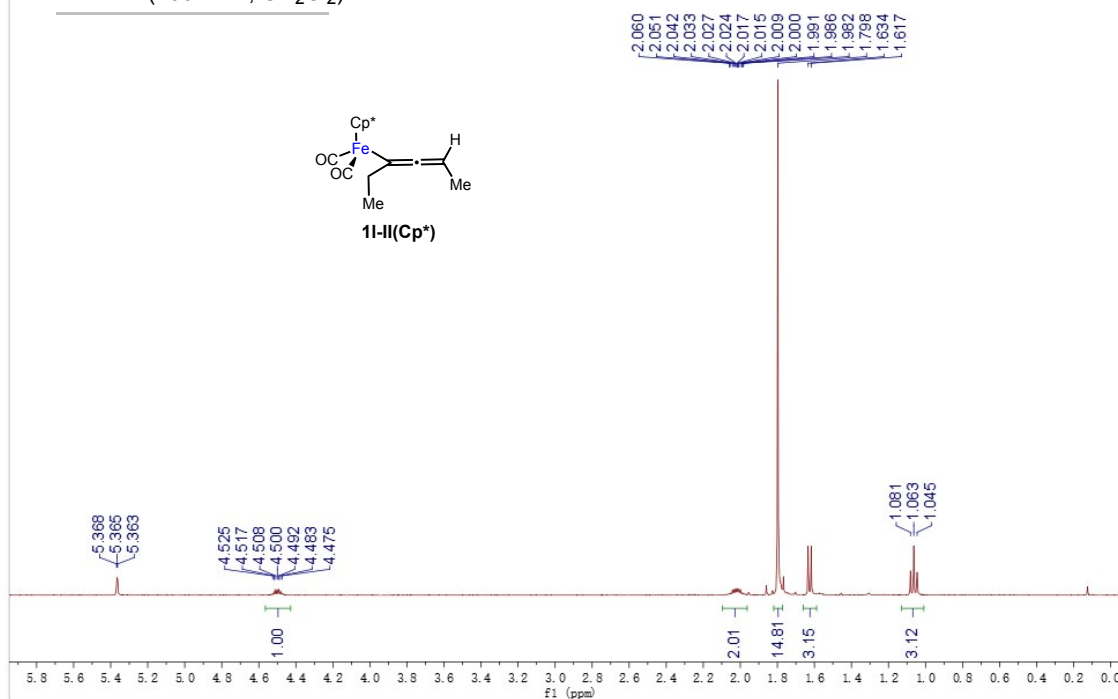

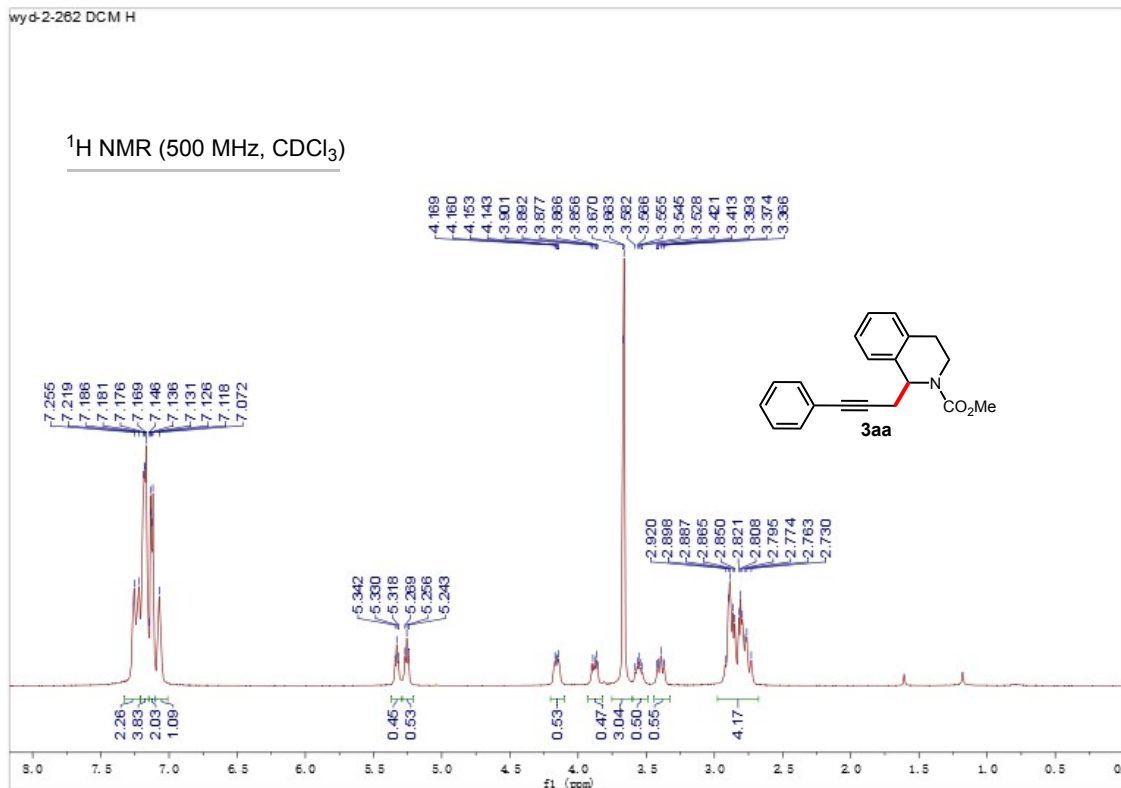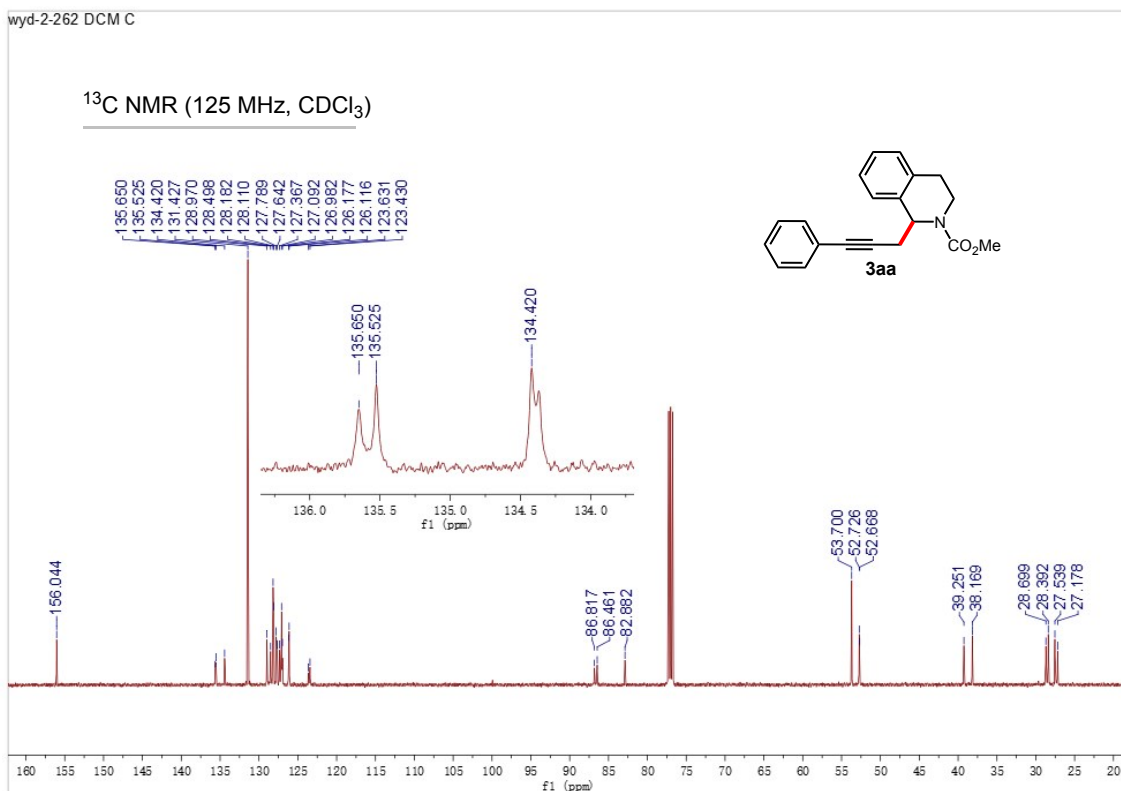

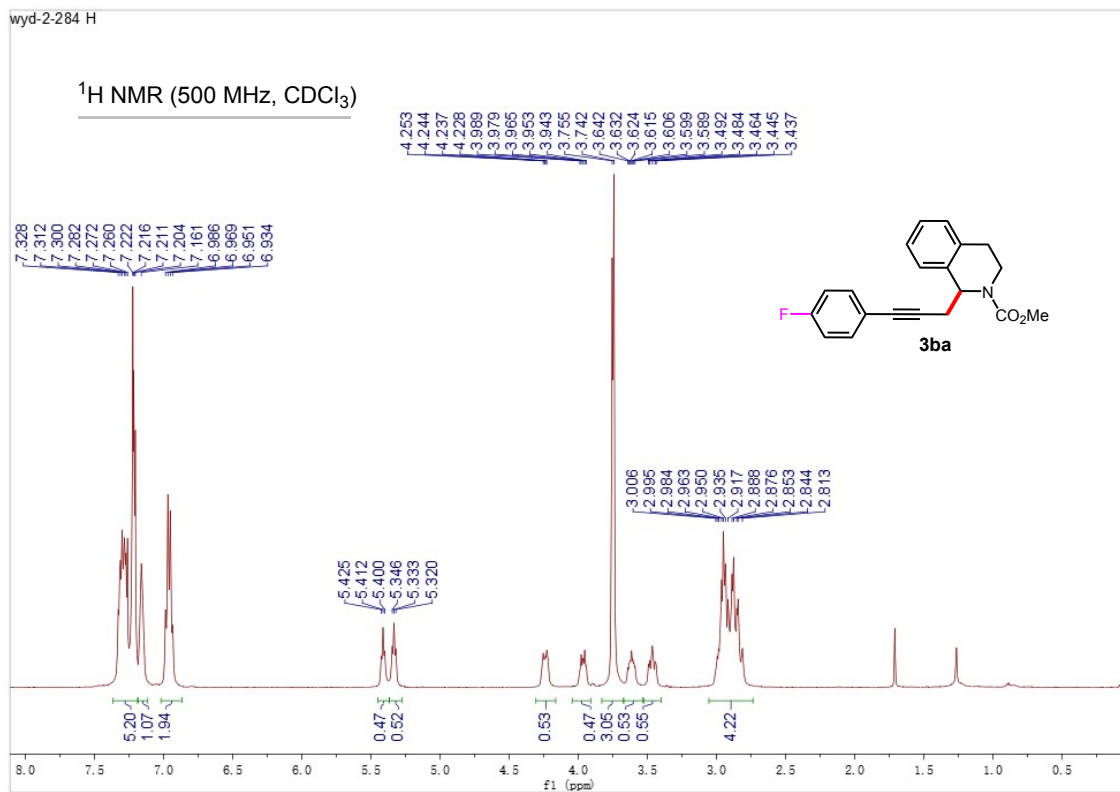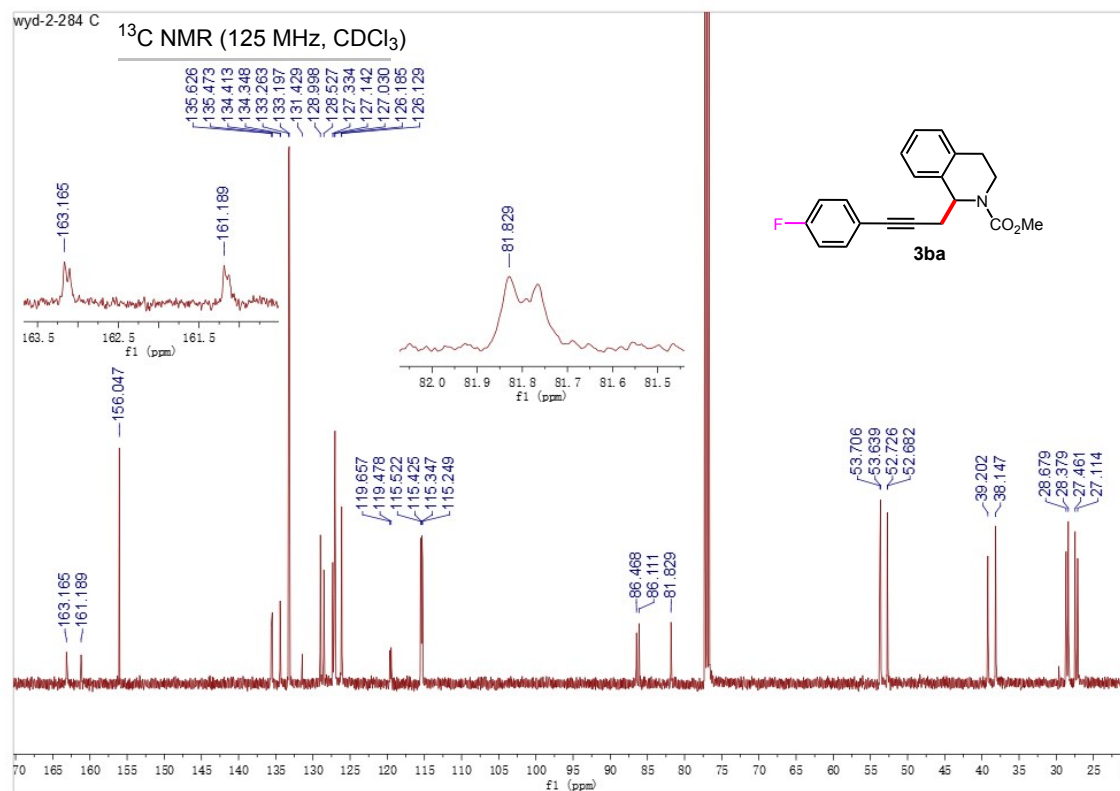

wyd-2-284 F

$^{19}\text{F}$  NMR (470 MHz,  $\text{CDCl}_3$ )

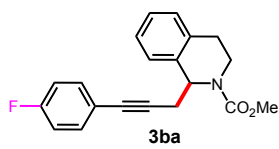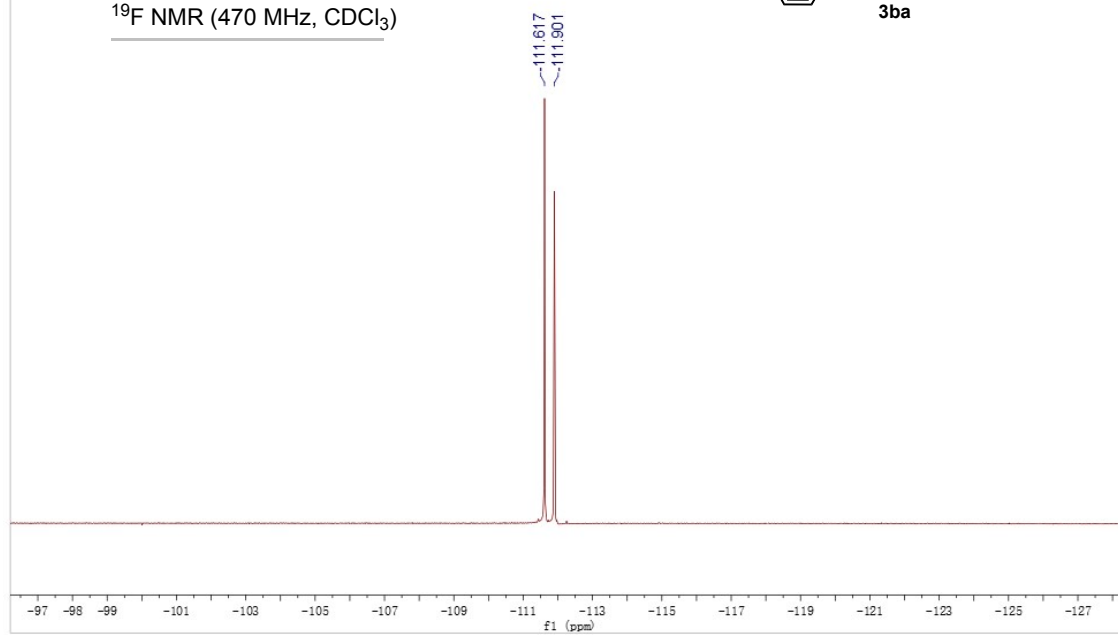

wyd-2-269 H

<sup>1</sup>H NMR (500 MHz, CDCl<sub>3</sub>)

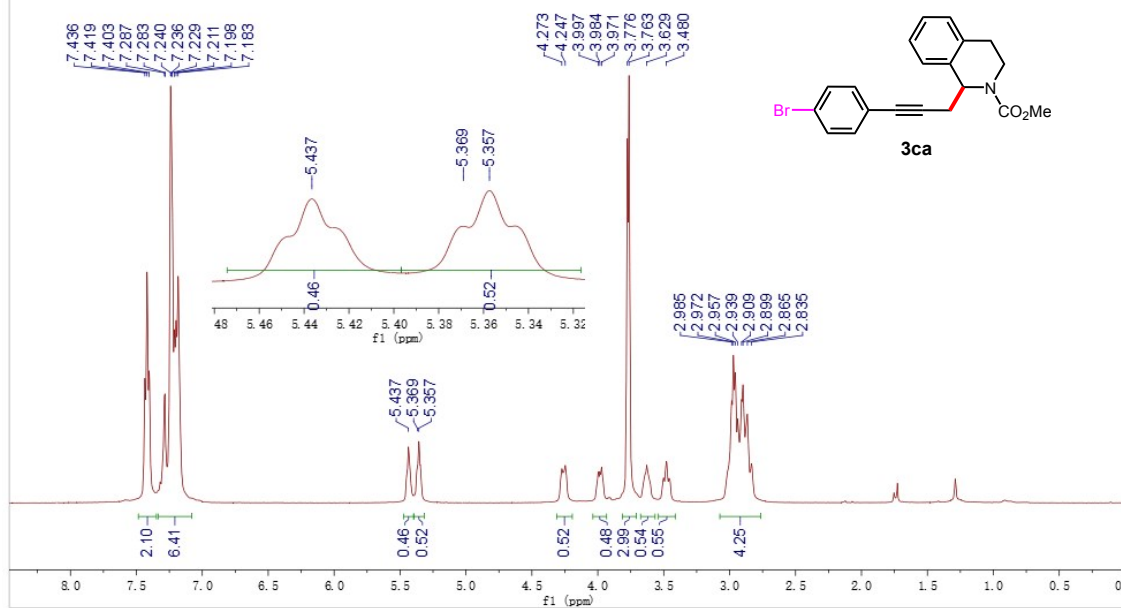

wyd-2-269 C

<sup>13</sup>C NMR (125 MHz, CDCl<sub>3</sub>)

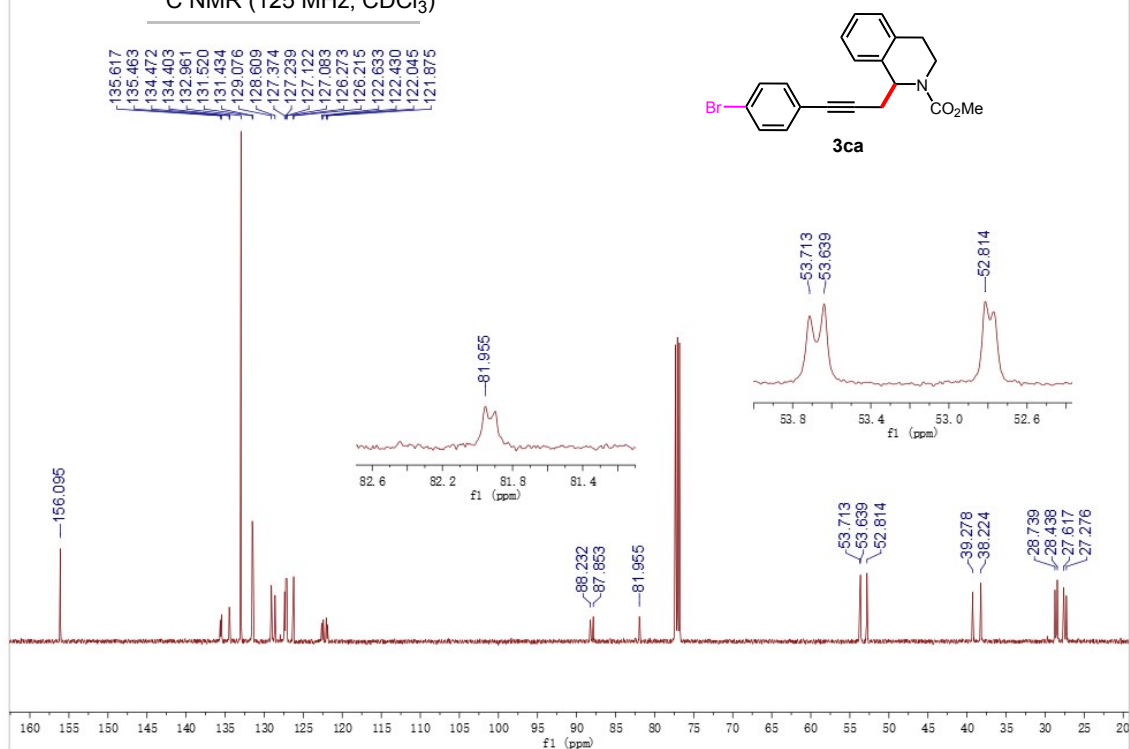

wyd-2-289 H

<sup>1</sup>H NMR (500 MHz, CDCl<sub>3</sub>)

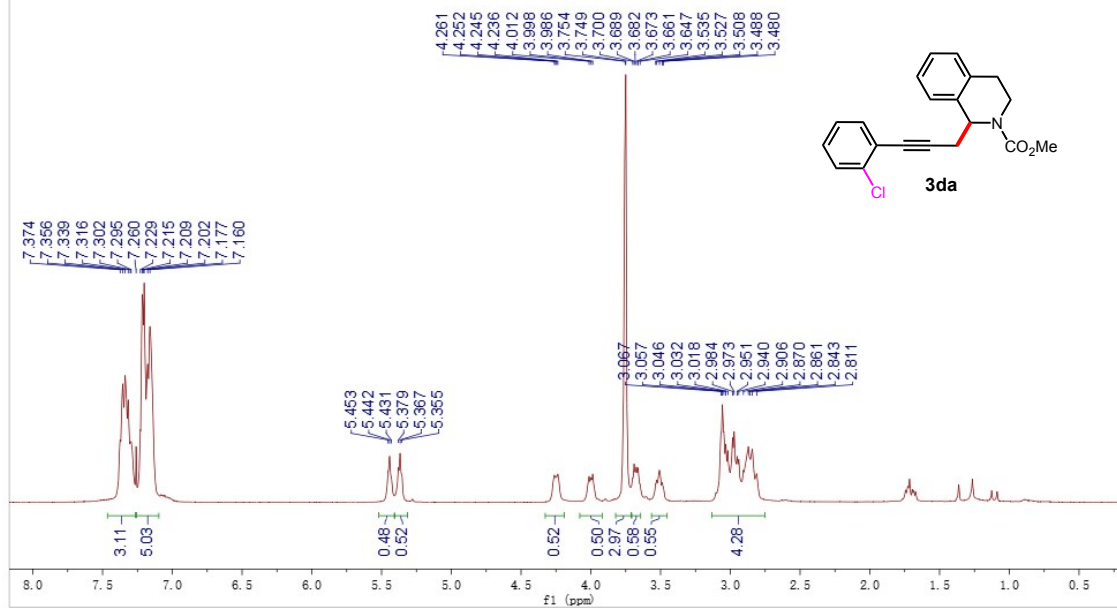

wyd-2-289 C

<sup>13</sup>C NMR (125 MHz, CDCl<sub>3</sub>)

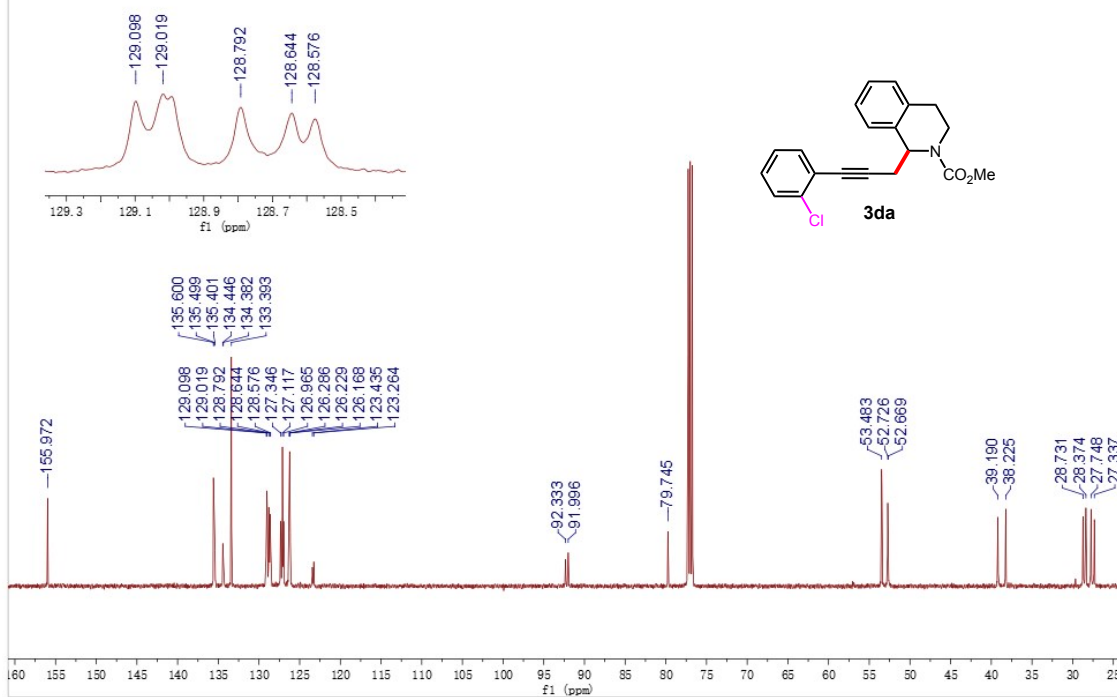



wyd-3-56 H

$^1\text{H}$  NMR (500 MHz,  $\text{CDCl}_3$ )

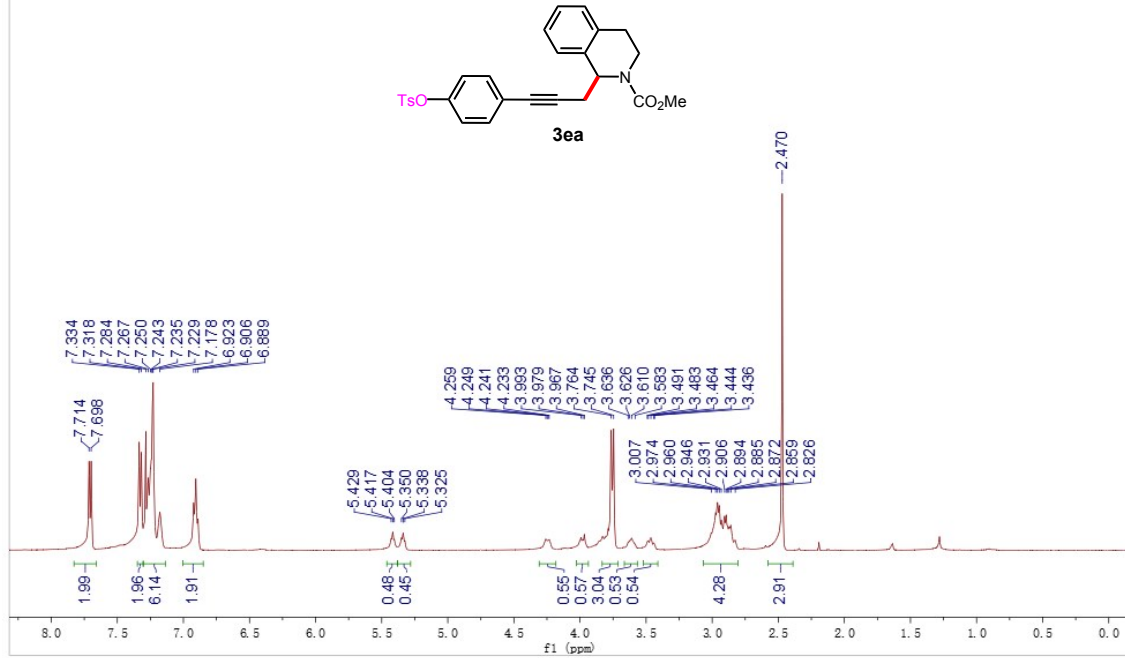

wyd-3-56 C

$^{13}\text{C}$  NMR (125 MHz,  $\text{CDCl}_3$ )

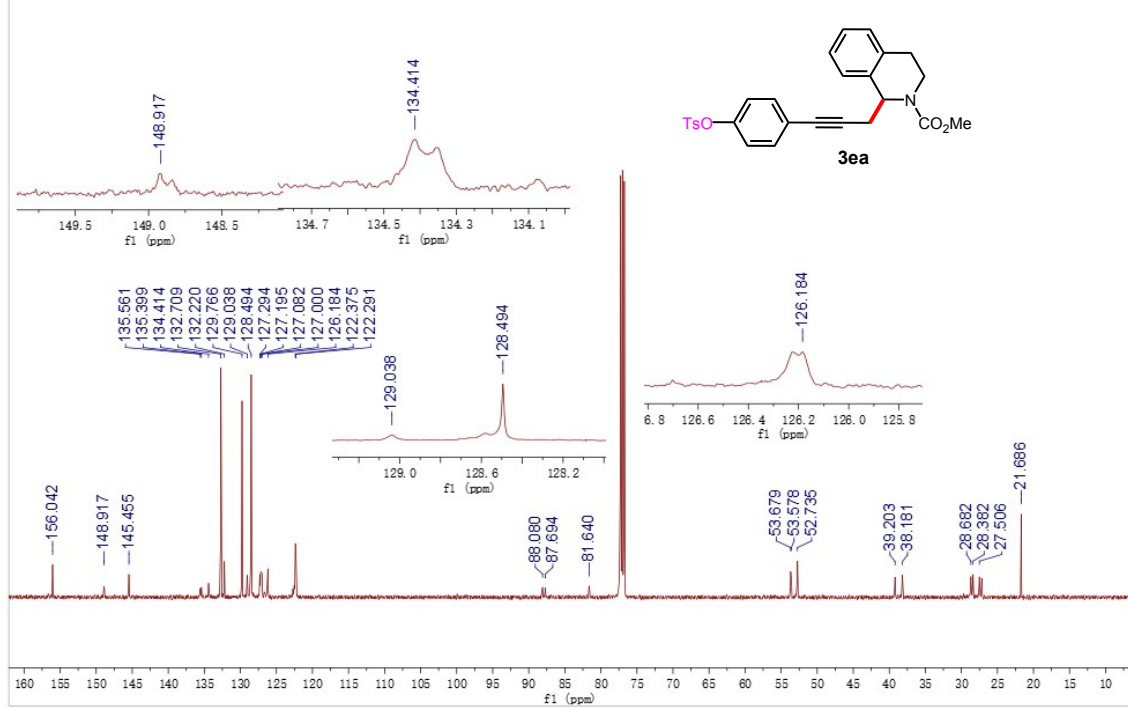

wyd-2-277 H

<sup>1</sup>H NMR (500 MHz, CDCl<sub>3</sub>)

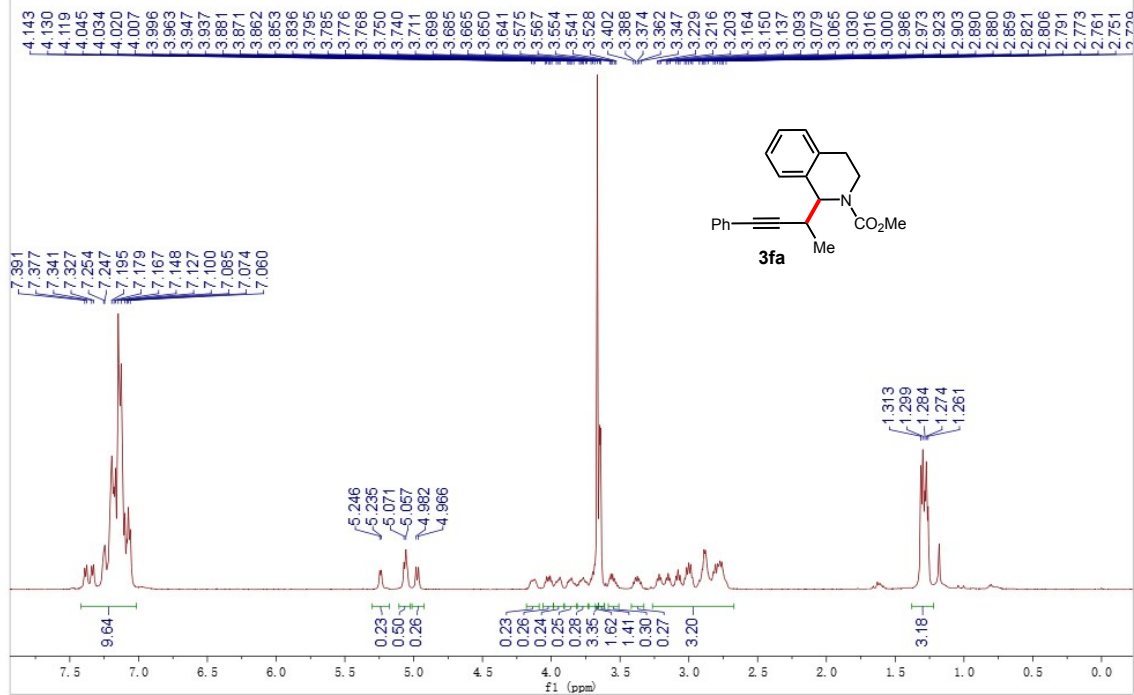

wyd-2-277 C

<sup>13</sup>C NMR (125 MHz, CDCl<sub>3</sub>)

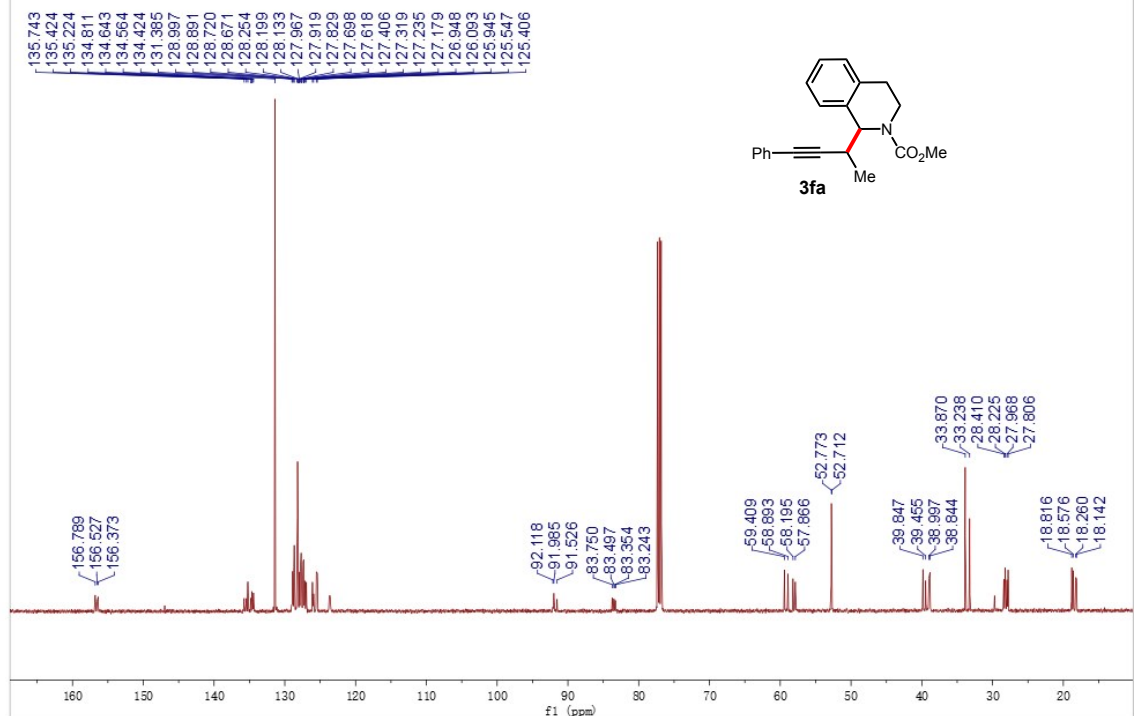

wyd-2-271 H

<sup>1</sup>H NMR (400 MHz, CDCl<sub>3</sub>)

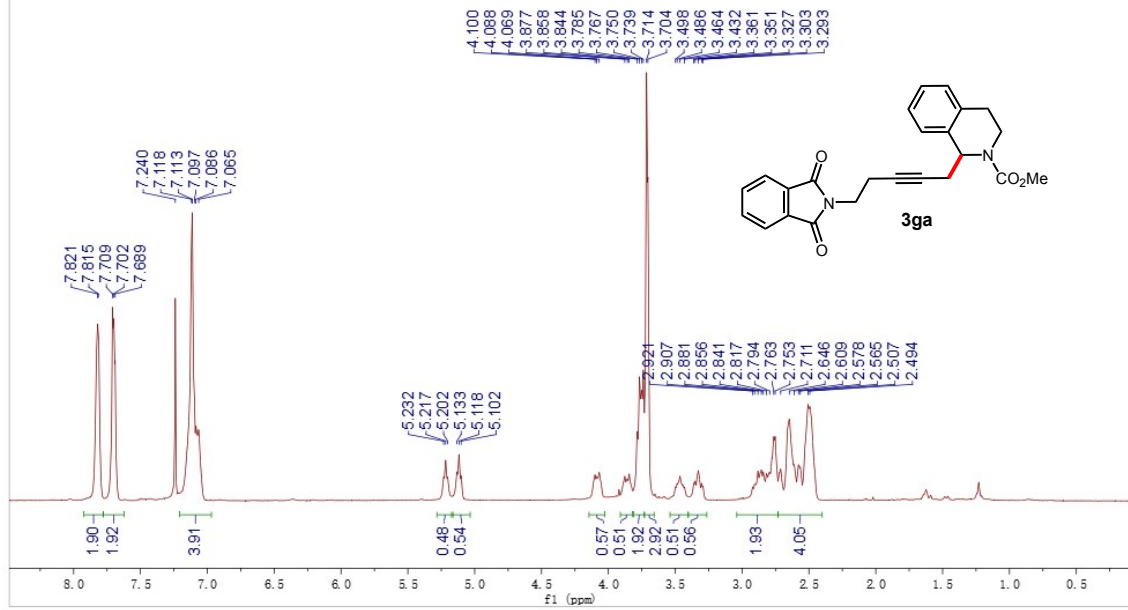

wyd-2-271 C

<sup>13</sup>C NMR (100 MHz, CDCl<sub>3</sub>)

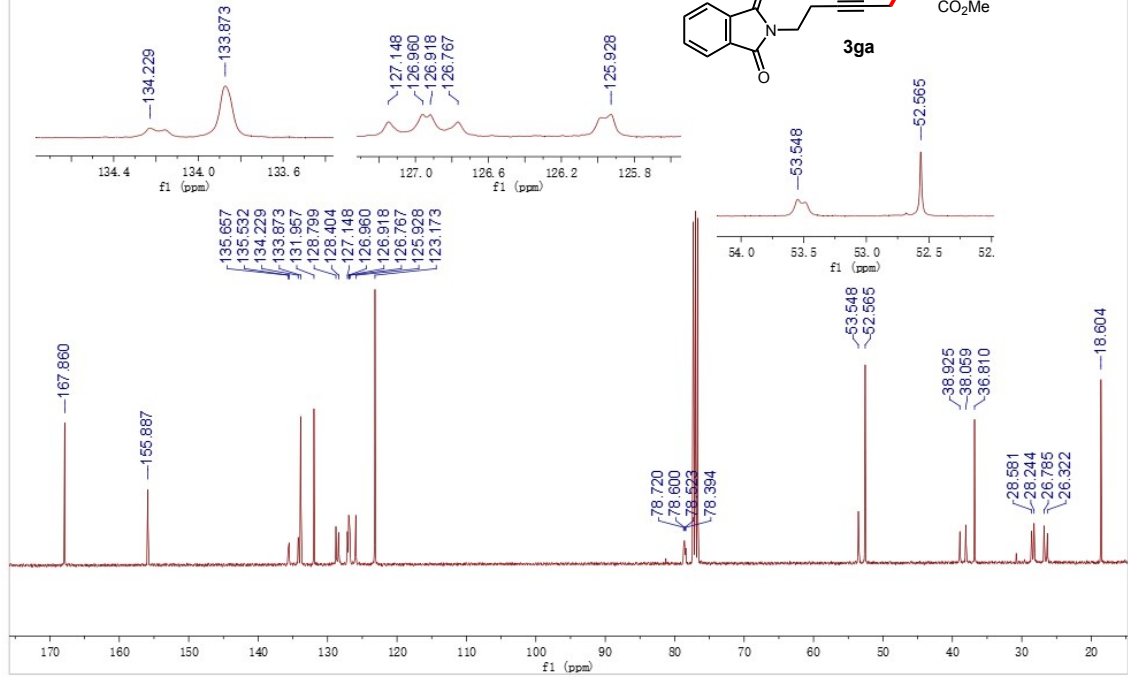

wyd-2-285 H

<sup>1</sup>H NMR (500 MHz, CDCl<sub>3</sub>)

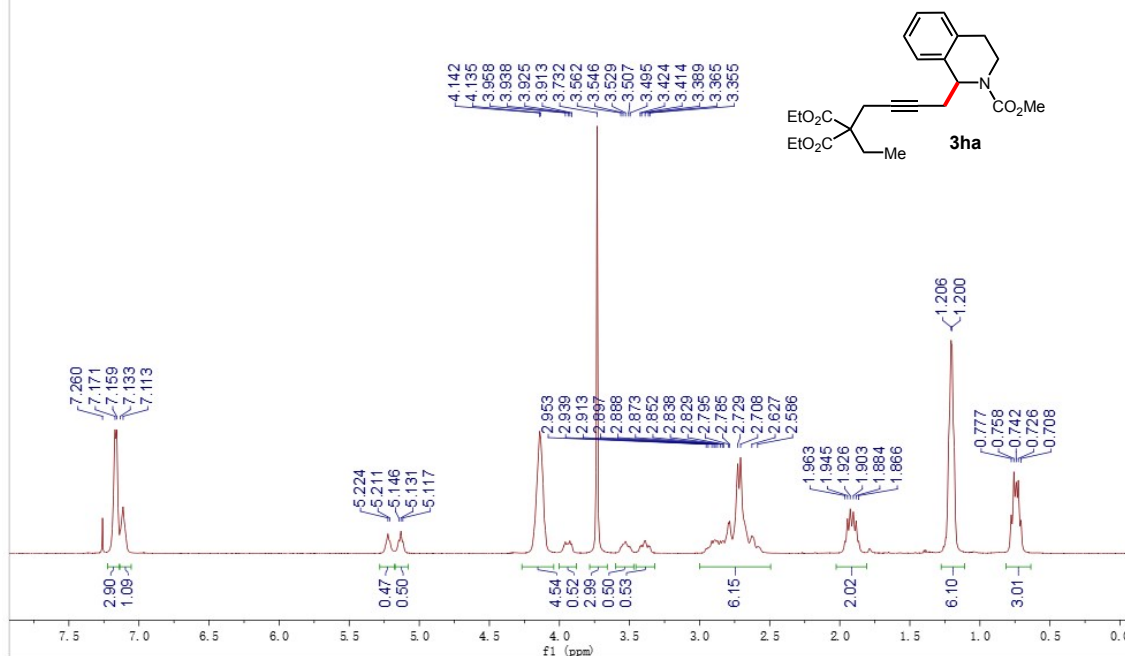

wyd-2-285 C

<sup>13</sup>C NMR (125 MHz, CDCl<sub>3</sub>)

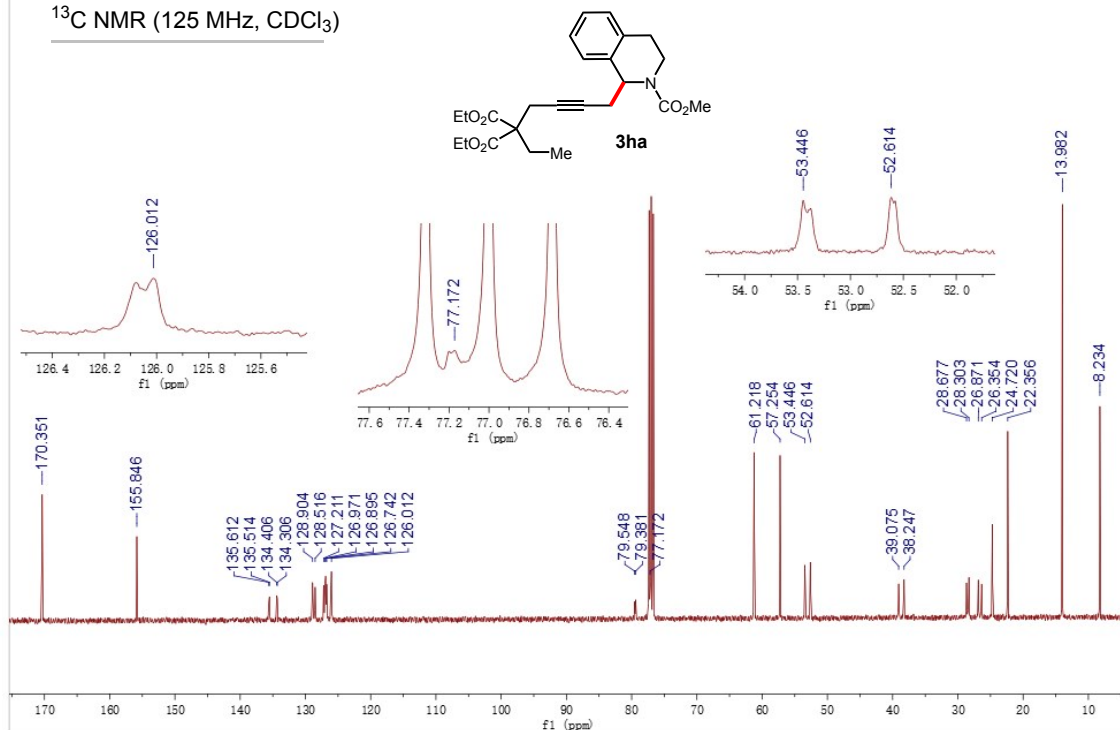

wyd-2-270 H

<sup>1</sup>H NMR (500 MHz, CDCl<sub>3</sub>)

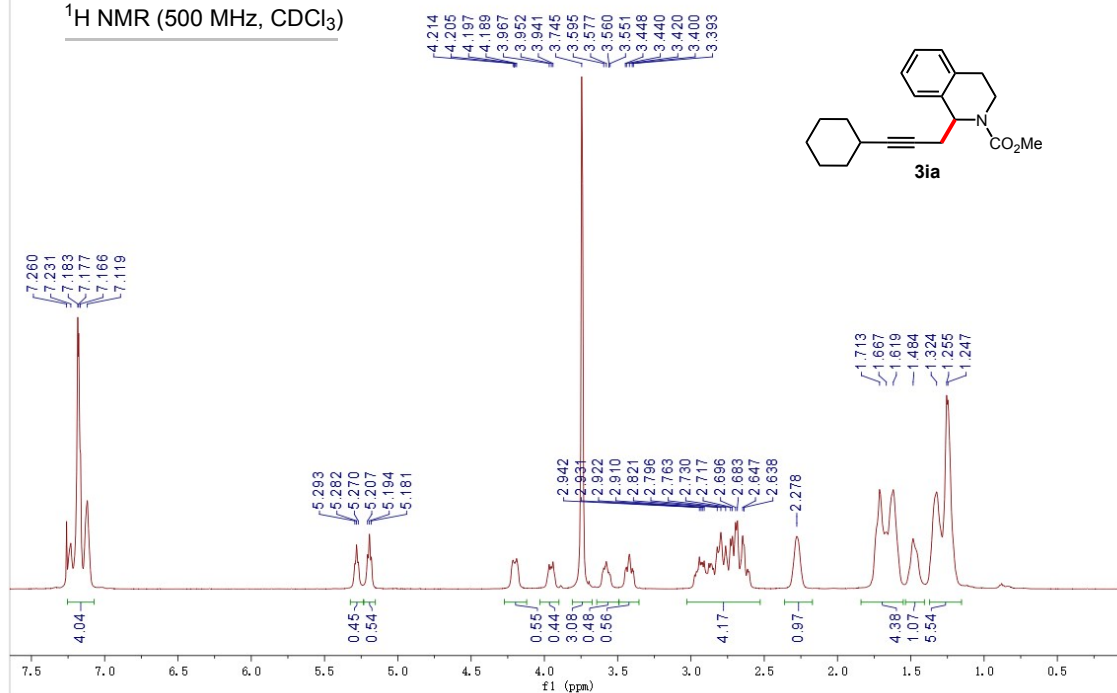

wyd-2-270 C

<sup>13</sup>C NMR (125 MHz, CDCl<sub>3</sub>)

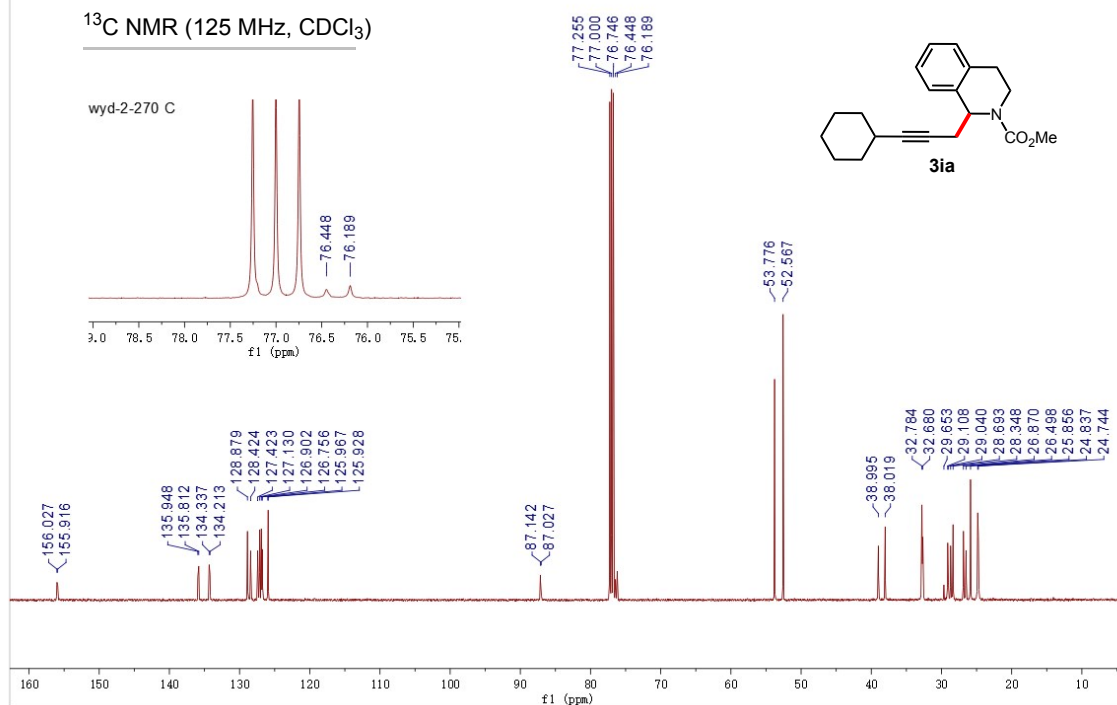

wyd-2-275 H

<sup>1</sup>H NMR (500 MHz, CDCl<sub>3</sub>)

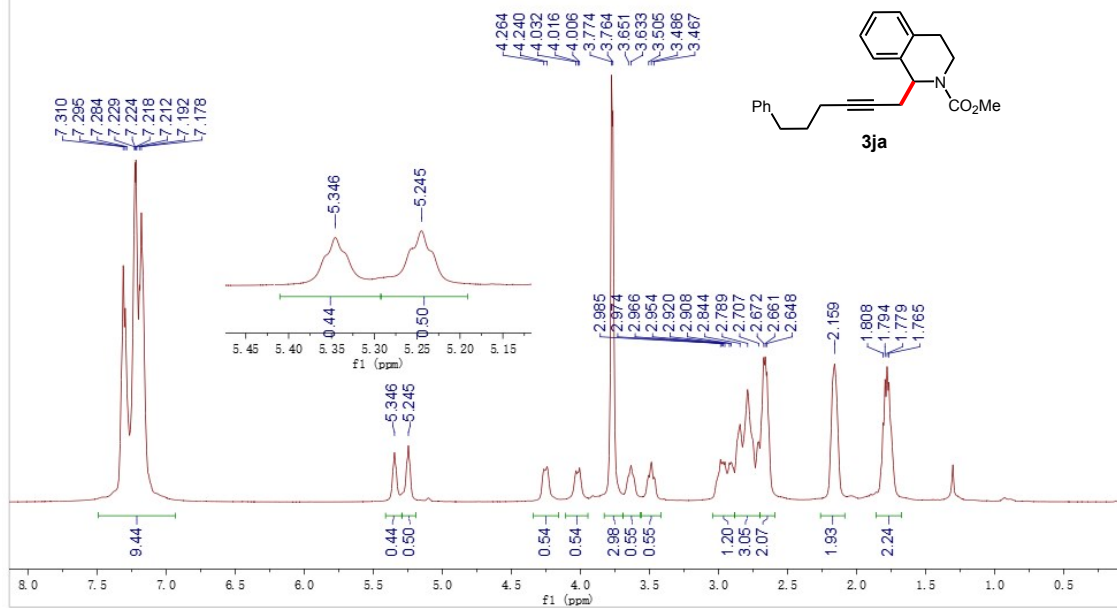

wyd-2-275 C

<sup>13</sup>C NMR (125 MHz, CDCl<sub>3</sub>)

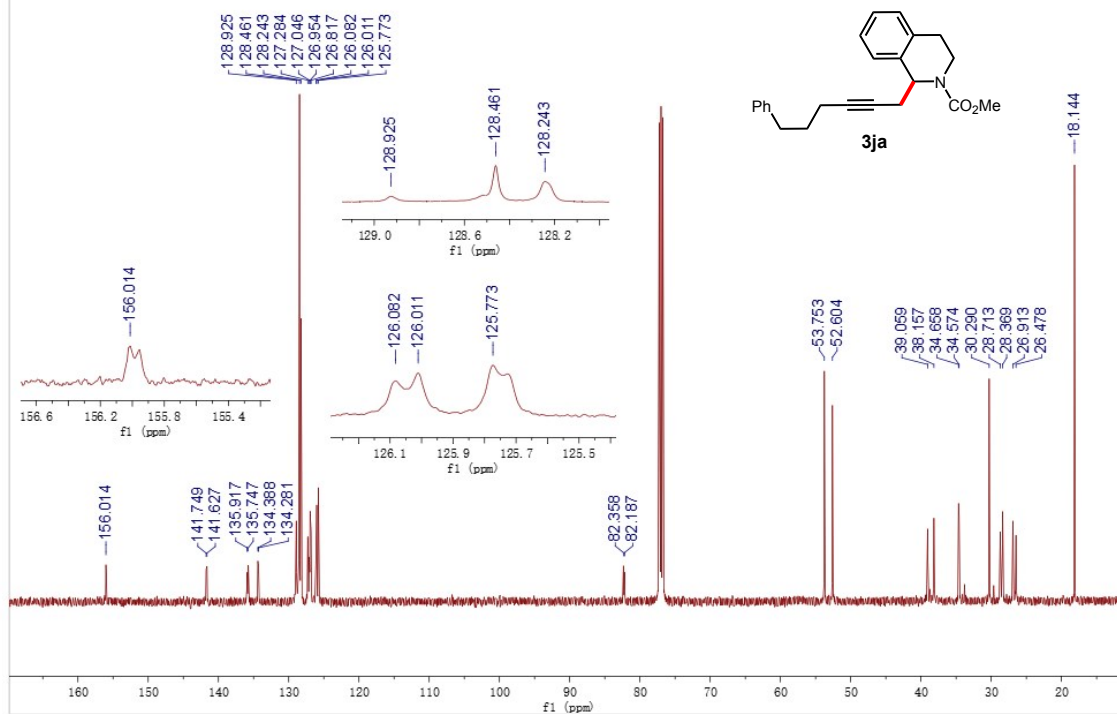

wyd-3-58 H

$^1\text{H NMR}$  (500 MHz,  $\text{CDCl}_3$ )

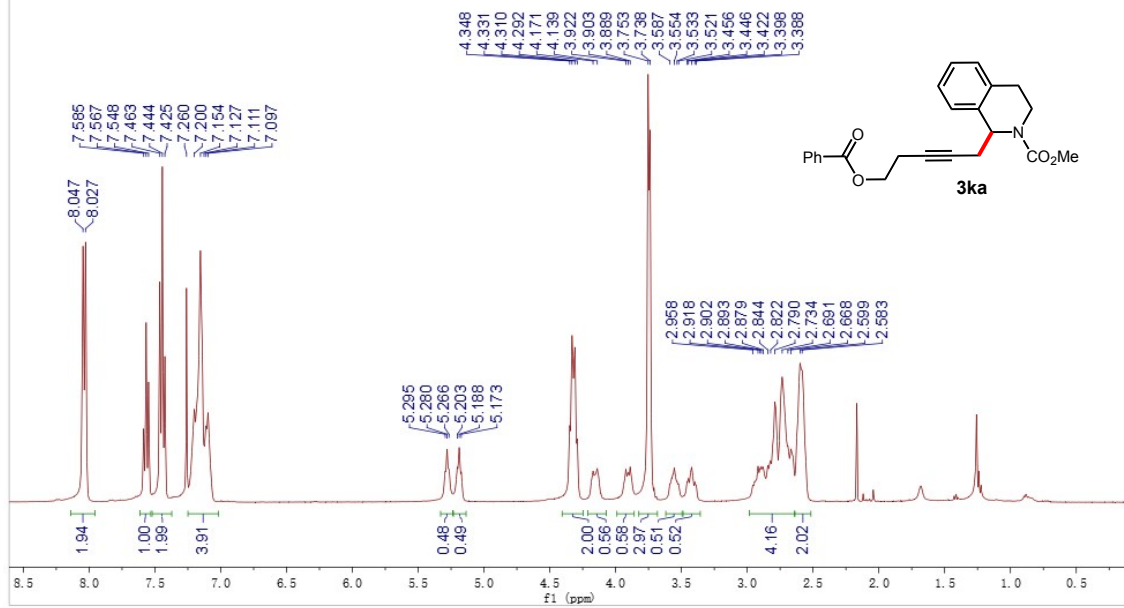

wyd-3-58 C

$^{13}\text{C NMR}$  (125 MHz,  $\text{CDCl}_3$ )

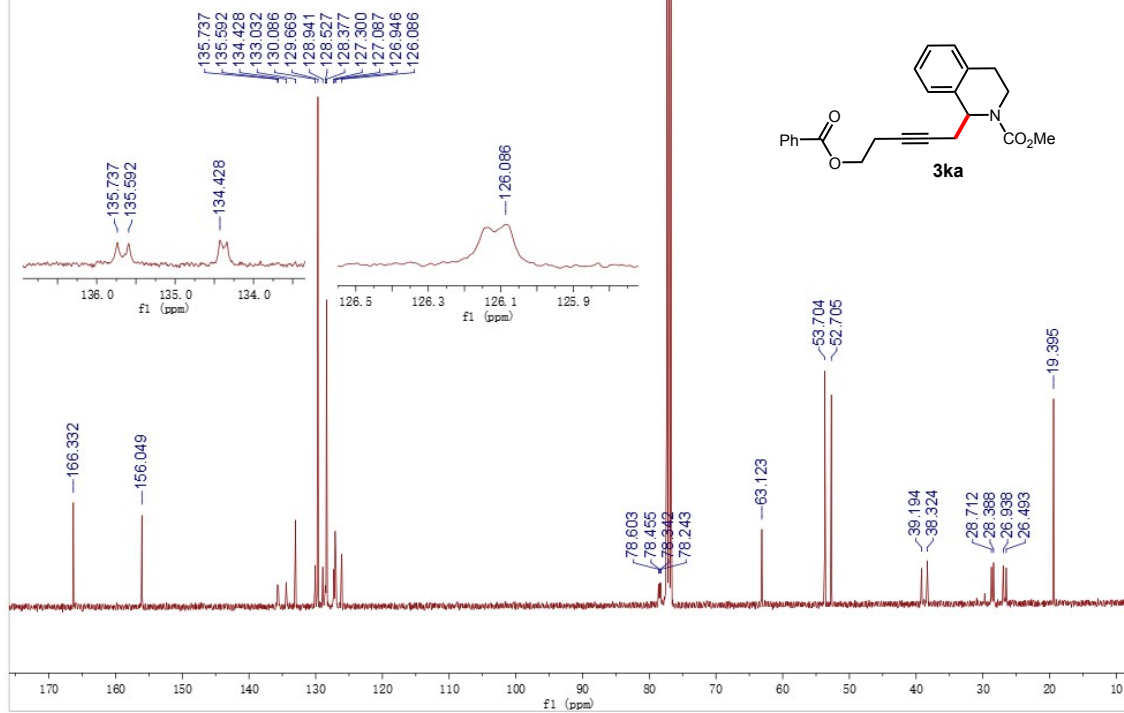

wyd-2-276-1 H

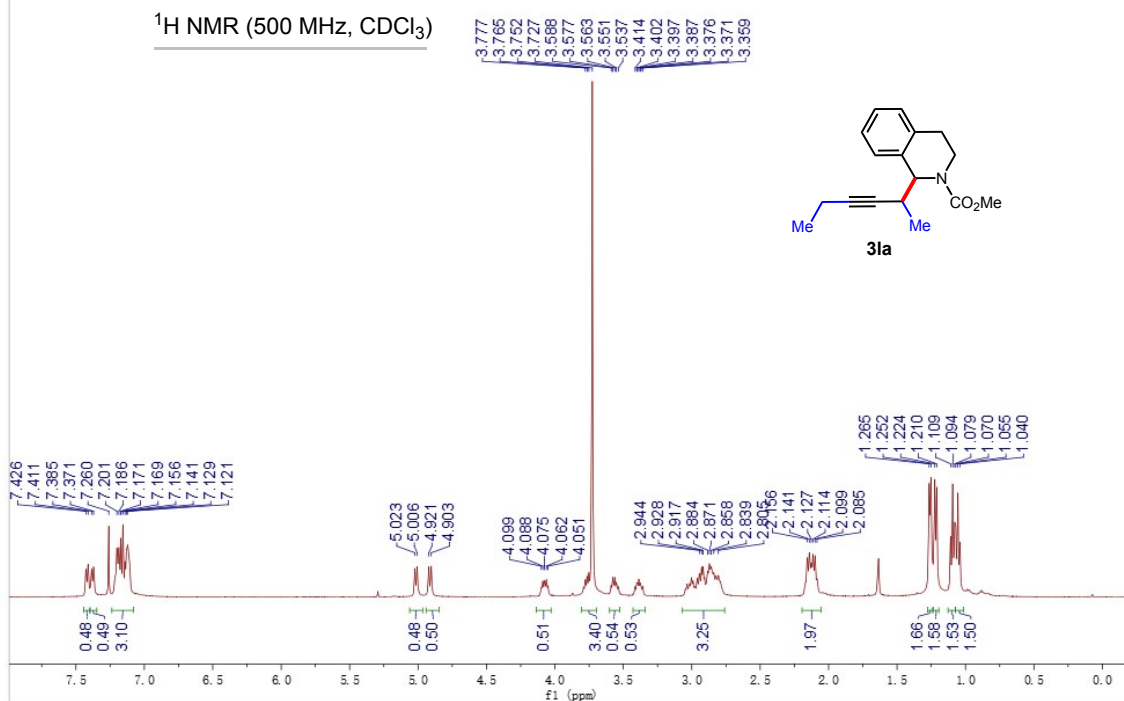

wyd-2-276-1 C

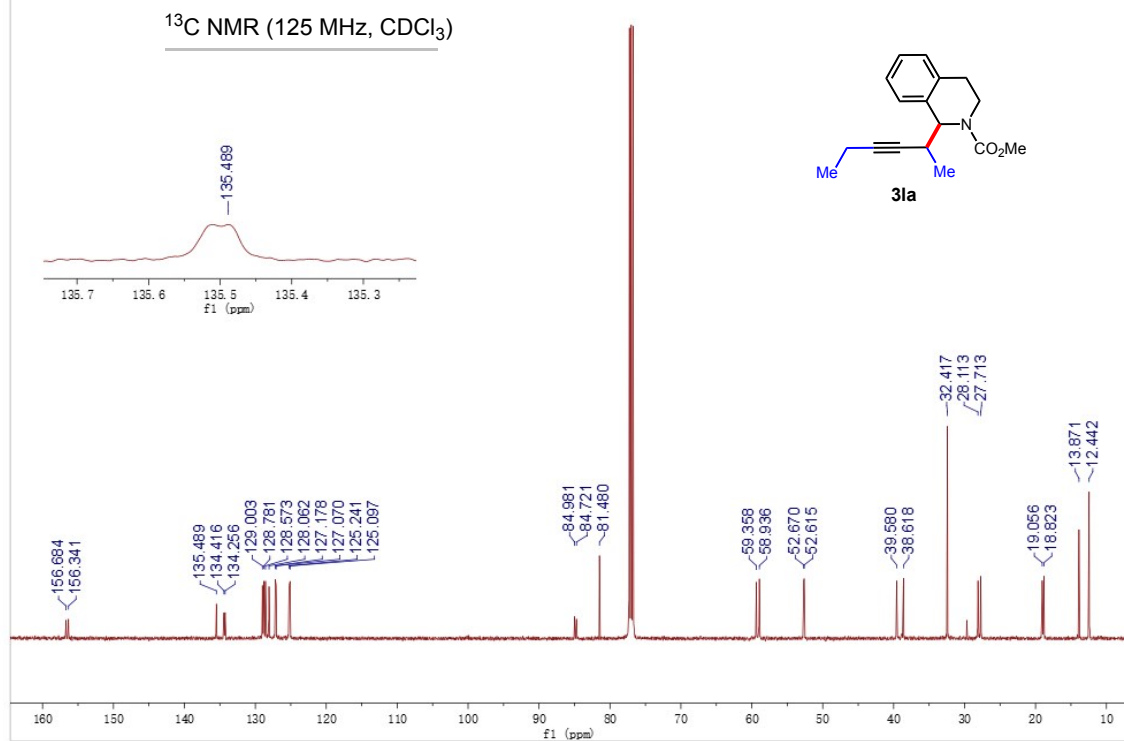



wyd-2-276-2 H

<sup>1</sup>H NMR (500 MHz, CDCl<sub>3</sub>)

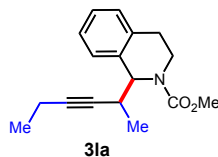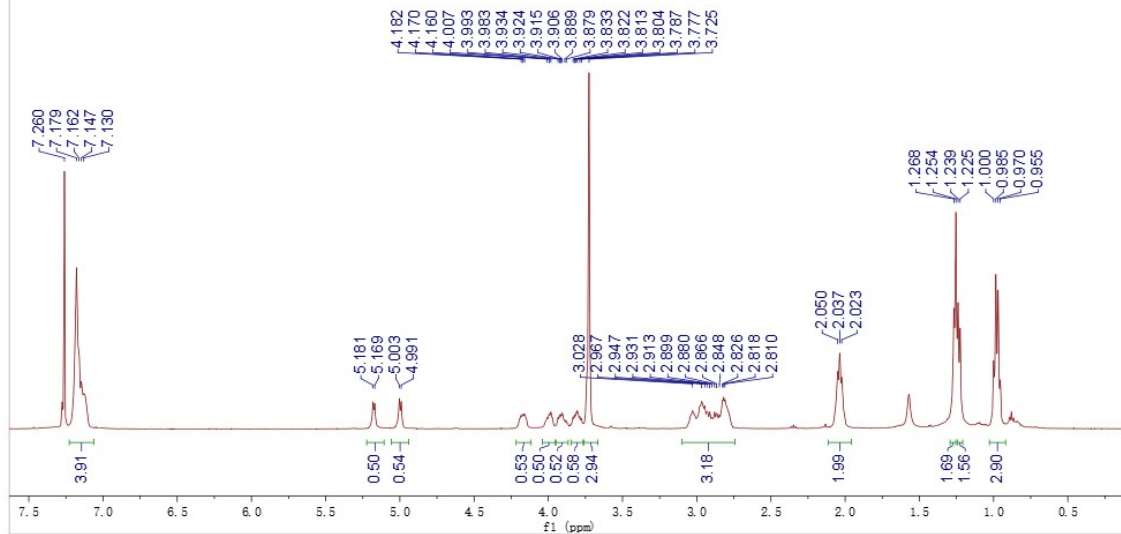

wyd-2-276-2 C

<sup>13</sup>C NMR (125 MHz, CDCl<sub>3</sub>)

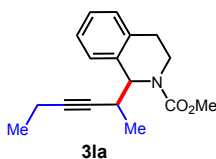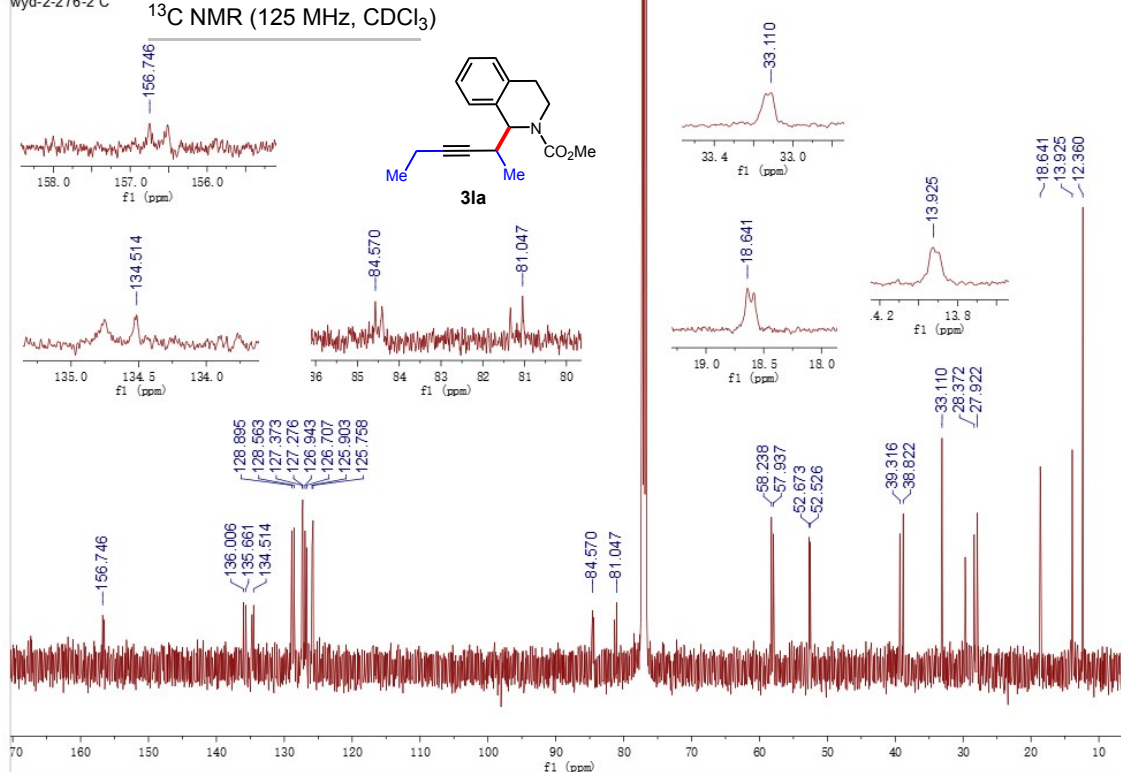

wyd-2-282 H

### $^1\text{H}$ NMR (500 MHz, $\text{CDCl}_3$ )

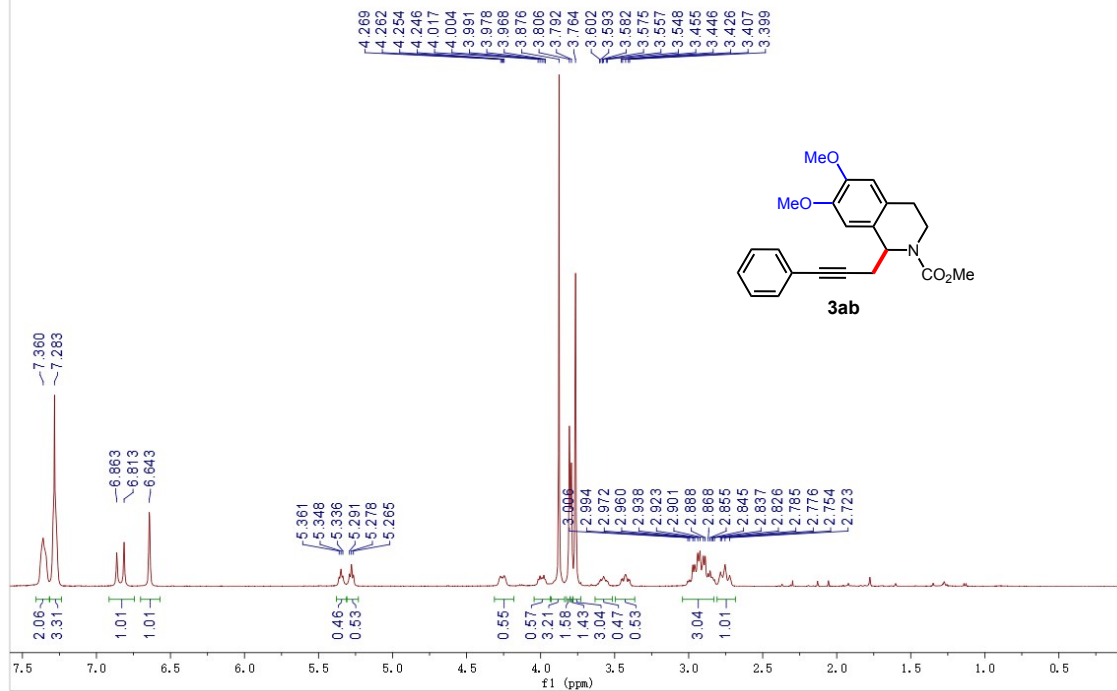

wyd-2-282 C

### $^{13}\text{C}$ NMR (125 MHz, $\text{CDCl}_3$ )

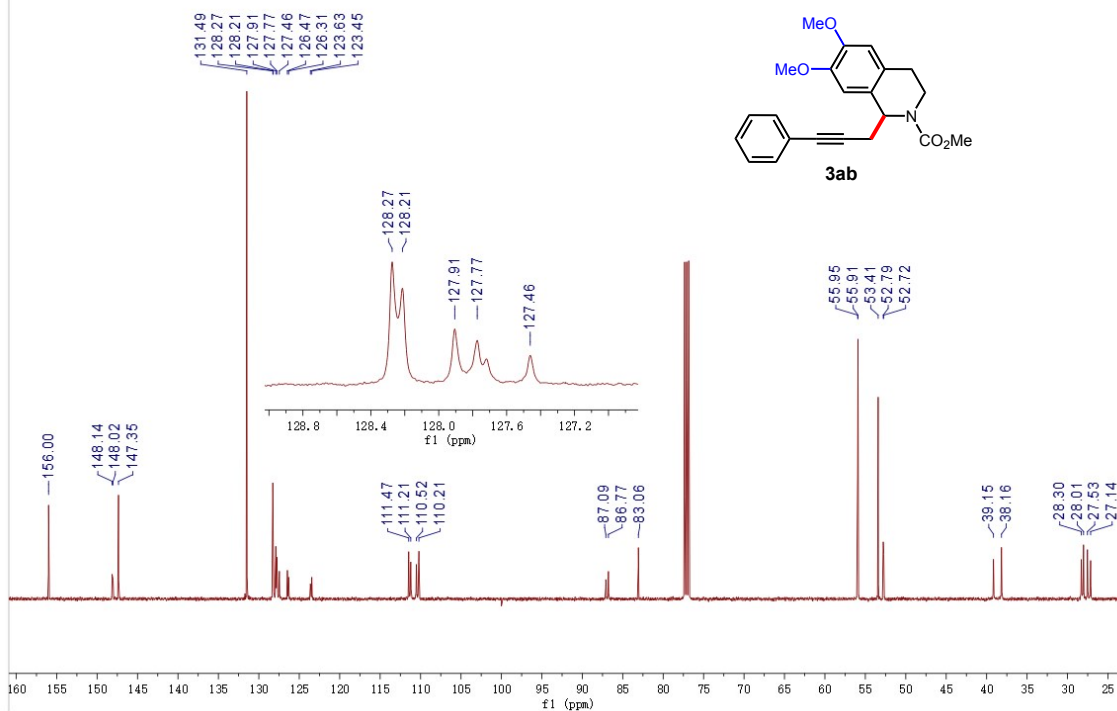

wyd-2-283 H

$^1\text{H}$  NMR (500 MHz,  $\text{CDCl}_3$ )

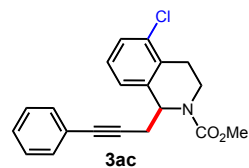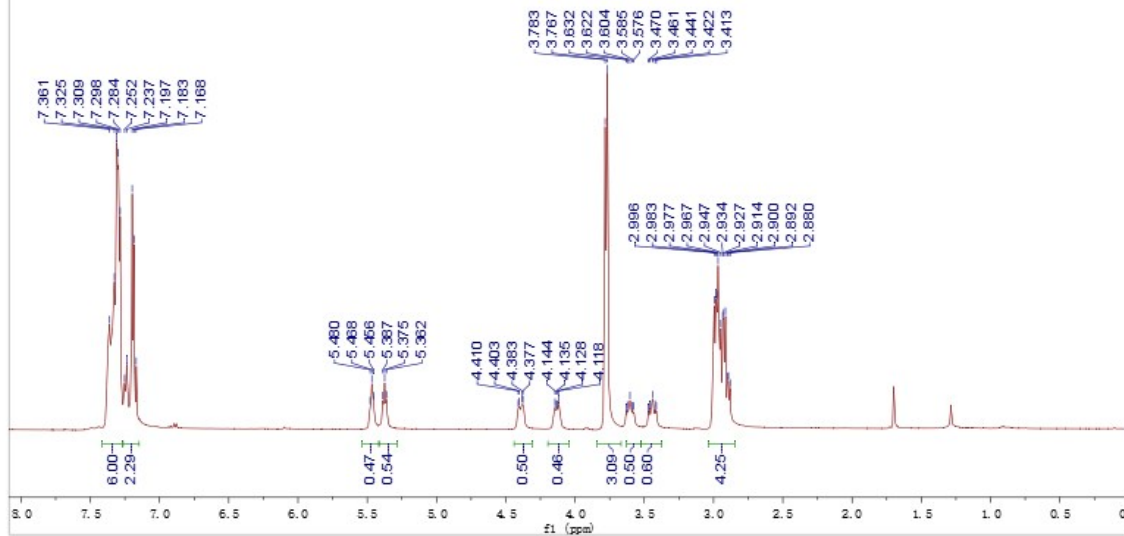

wyd-2-283 C

$^{13}\text{C}$  NMR (125 MHz,  $\text{CDCl}_3$ )

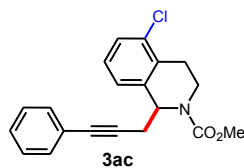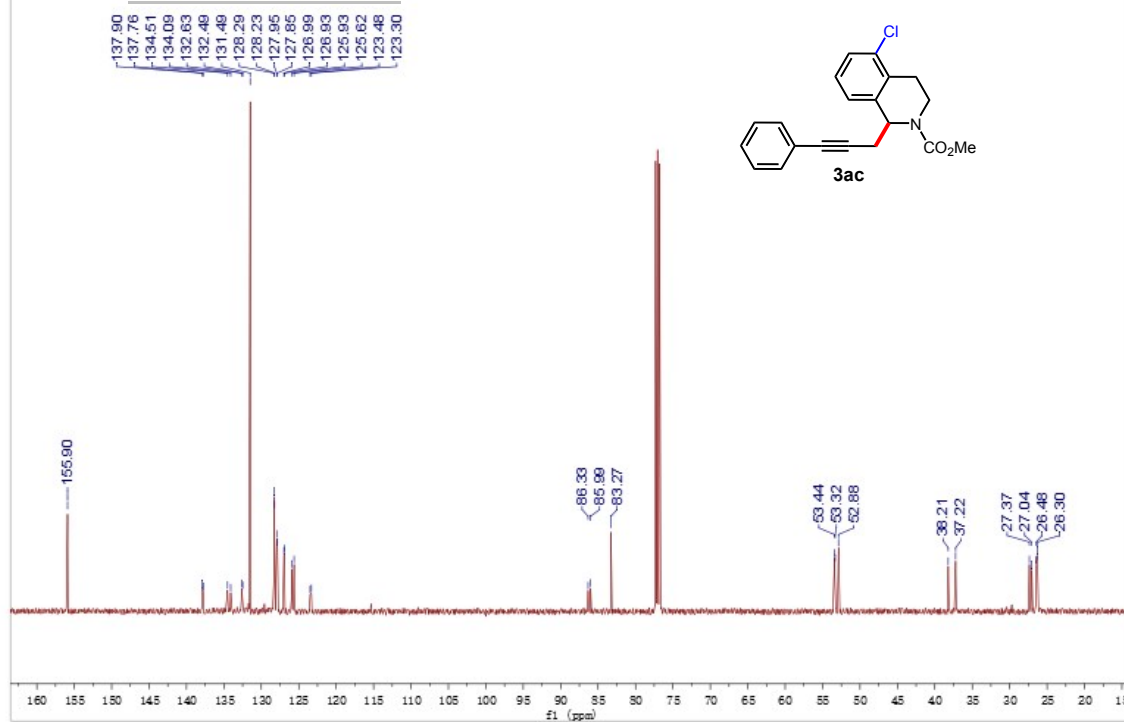

wyd-2-290 H

<sup>1</sup>H NMR (500 MHz, CDCl<sub>3</sub>)

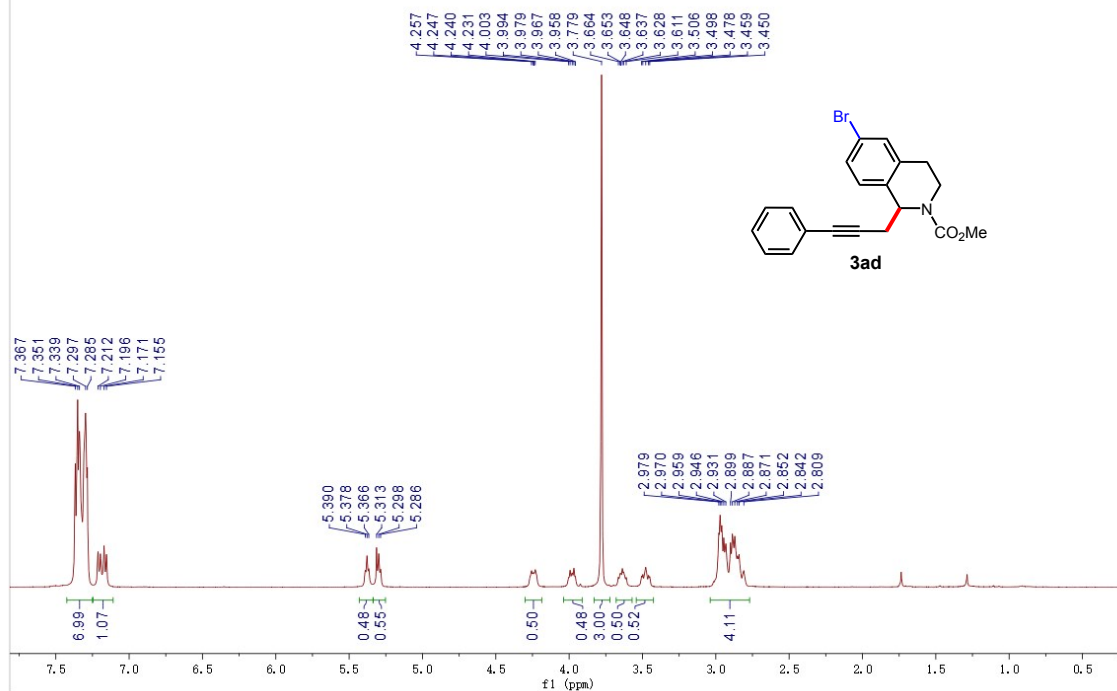

wyd-2-290 C

<sup>13</sup>C NMR (125 MHz, CDCl<sub>3</sub>)

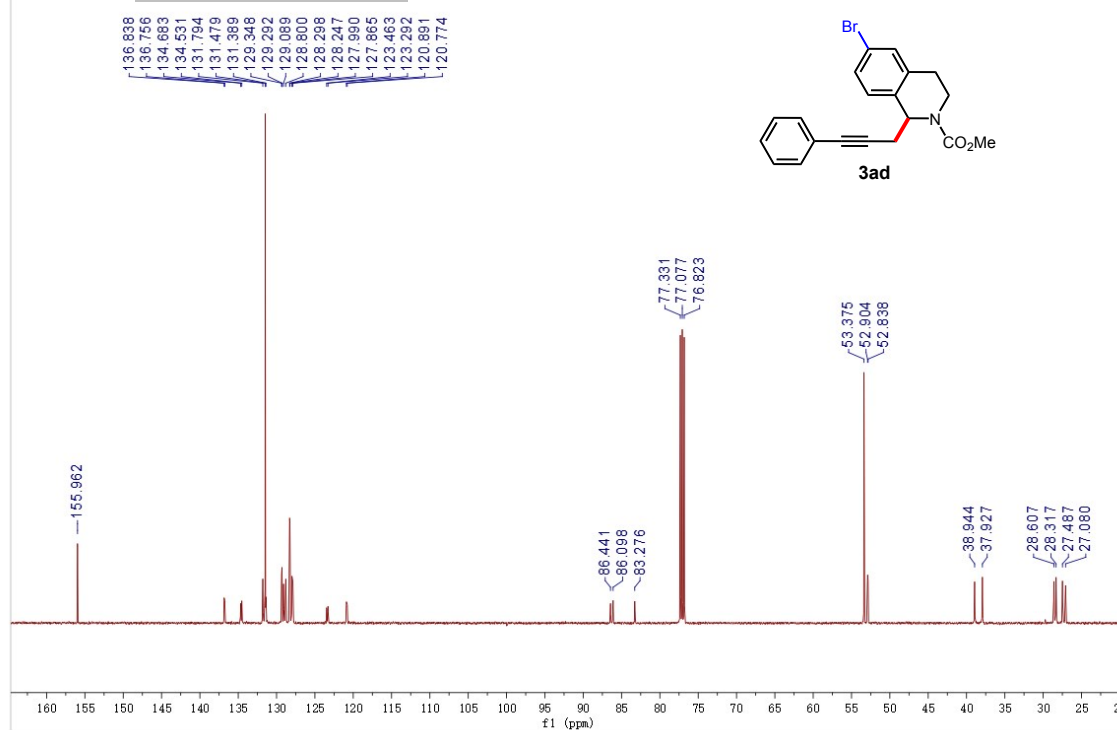

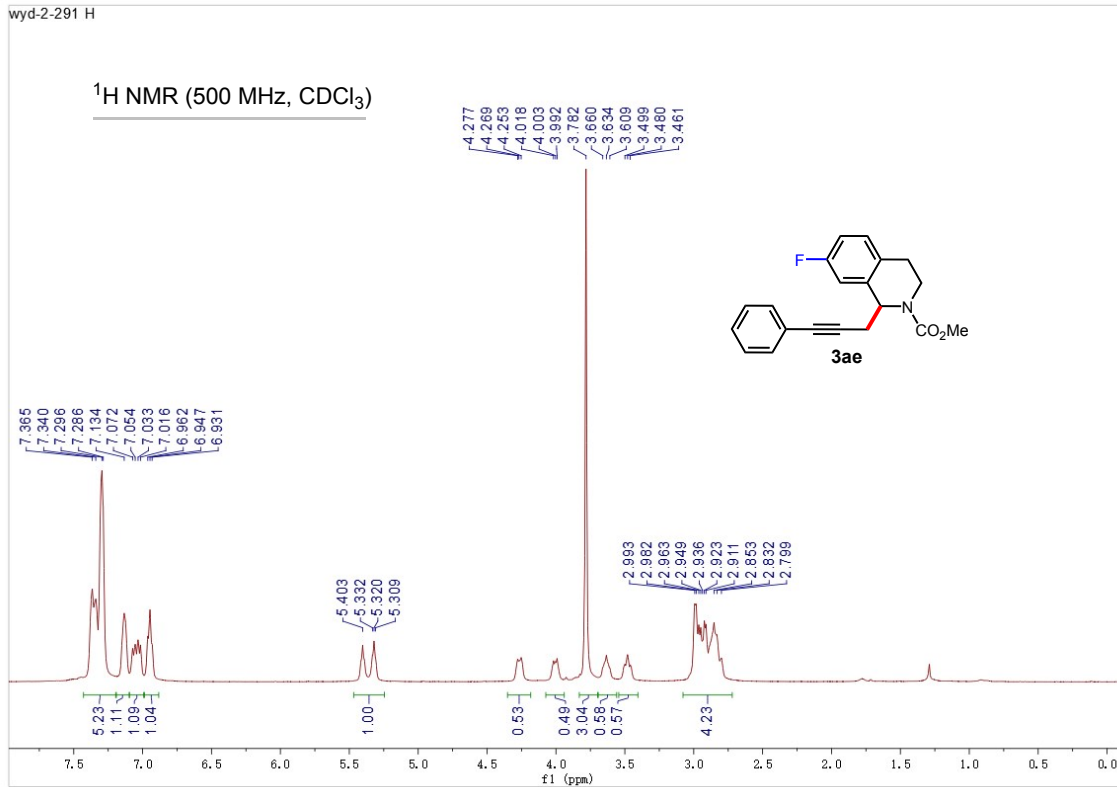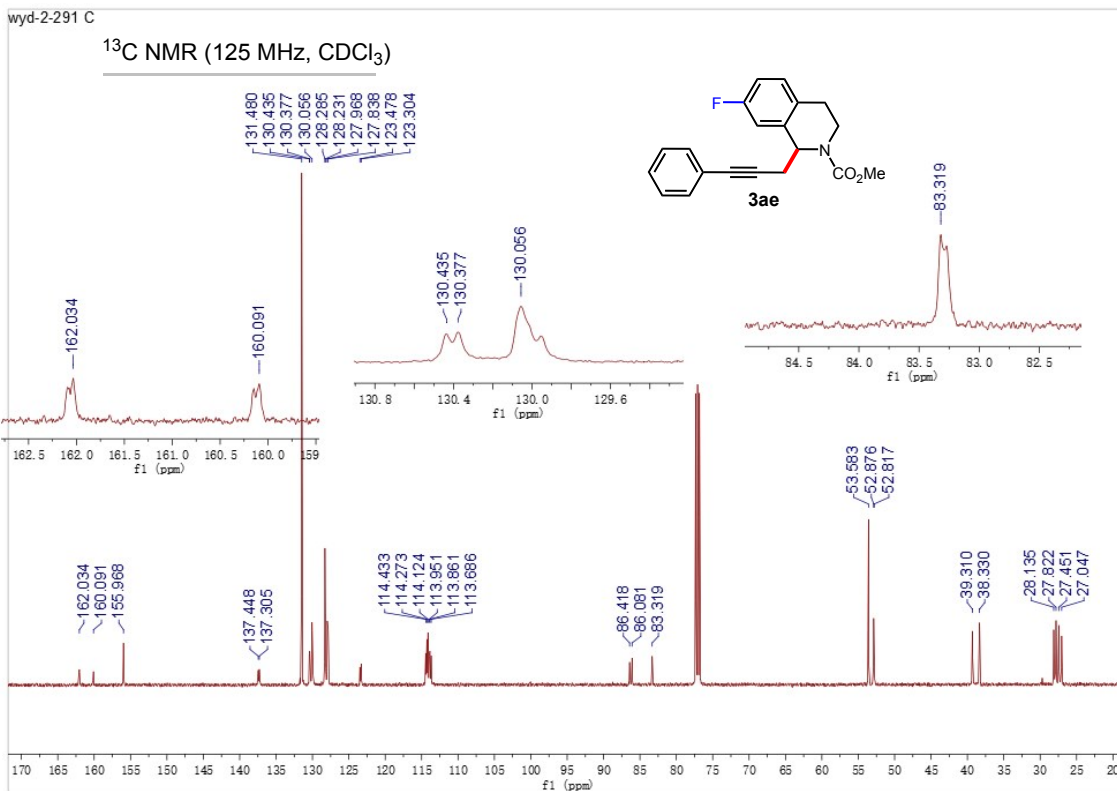

wyd-2-291 F

$^{19}\text{F}$  NMR (470 MHz,  $\text{CDCl}_3$ )

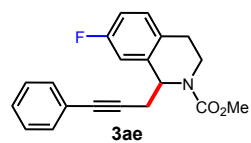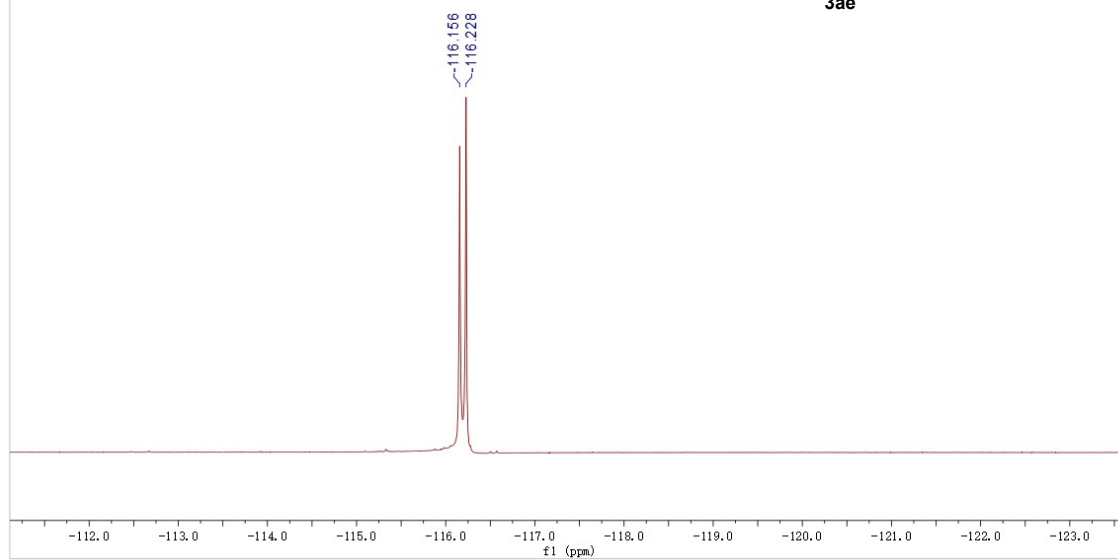

wyd-2-292 H

<sup>1</sup>H NMR (500 MHz, CDCl<sub>3</sub>)

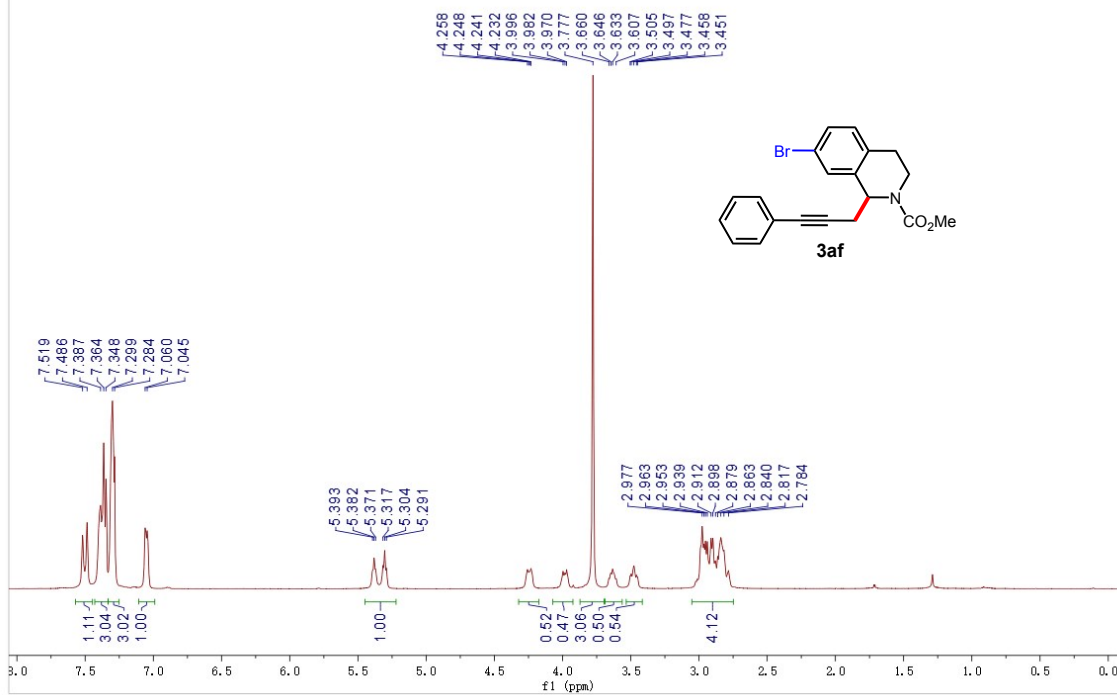

wyd-2-292 C

<sup>13</sup>C NMR (125 MHz, CDCl<sub>3</sub>)

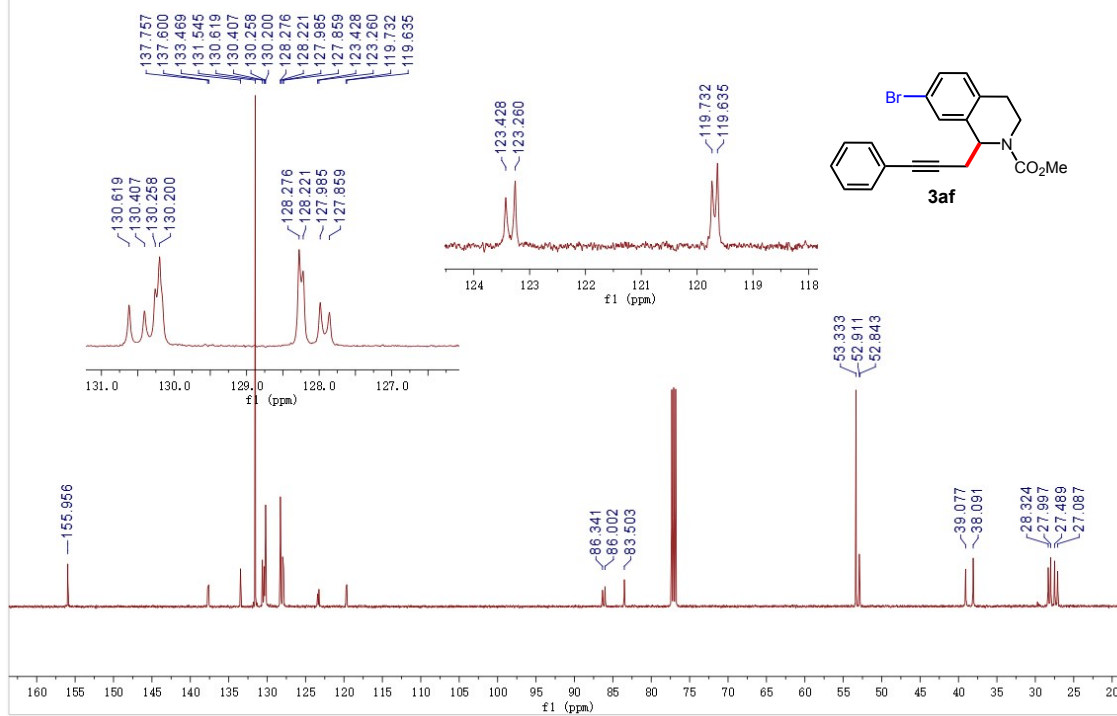

wyd-2-298 H

<sup>1</sup>H NMR (500 MHz, CDCl<sub>3</sub>)

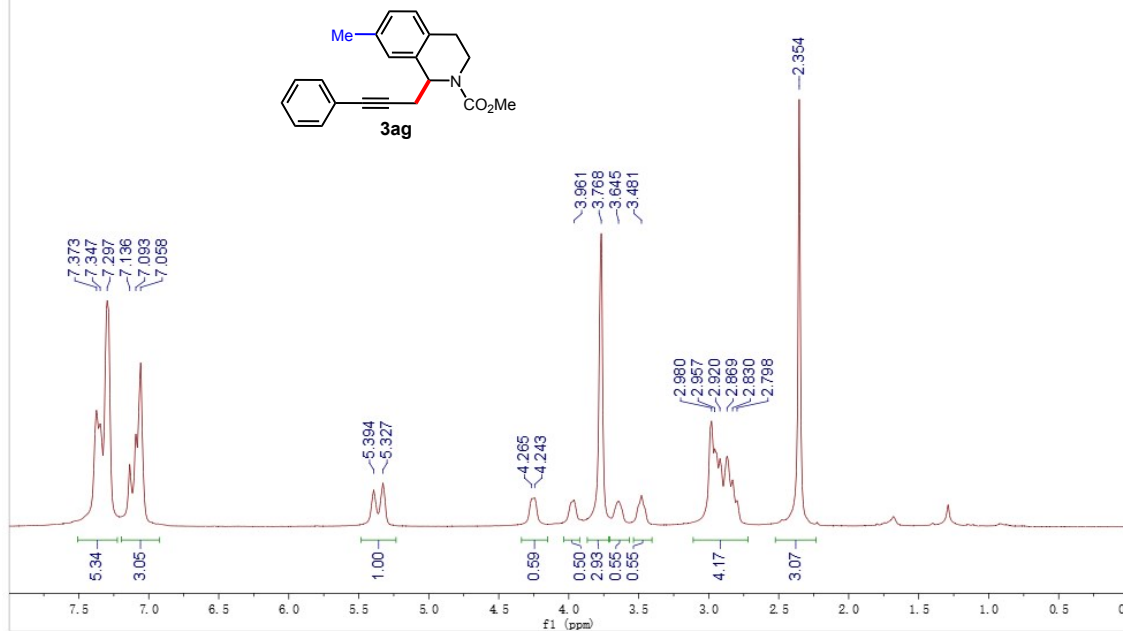

wyd-2-298 C

<sup>13</sup>C NMR (125 MHz, CDCl<sub>3</sub>)

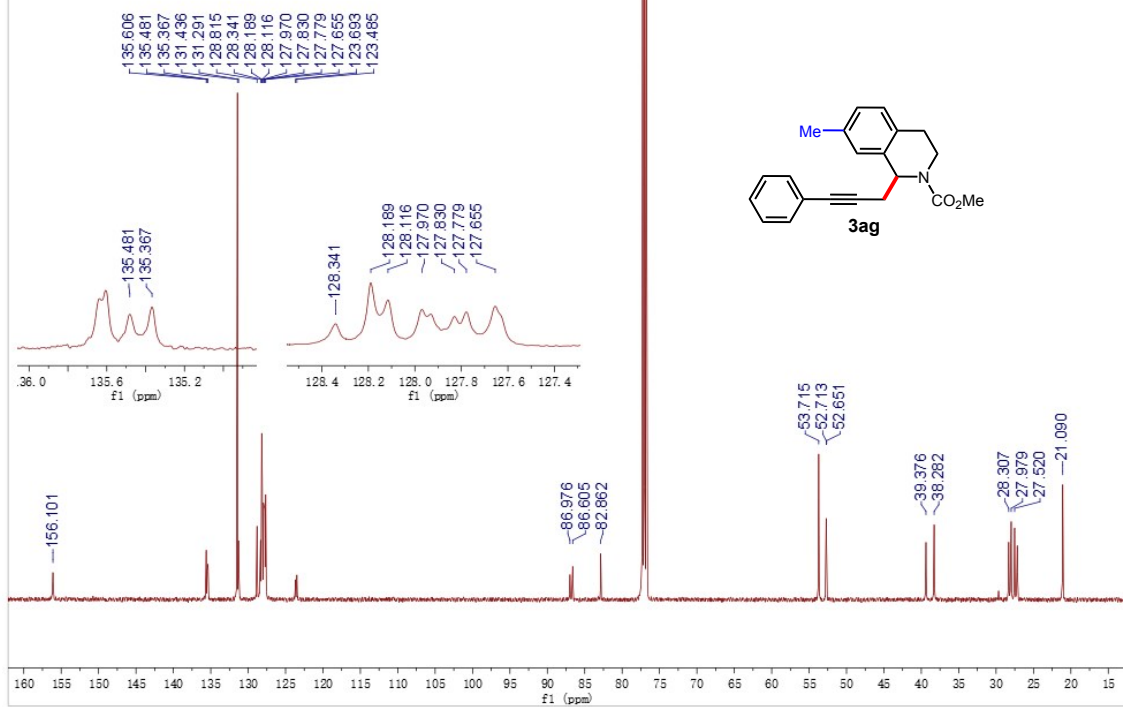



wyd-3-63 H

<sup>1</sup>H NMR (500 MHz, CDCl<sub>3</sub>)

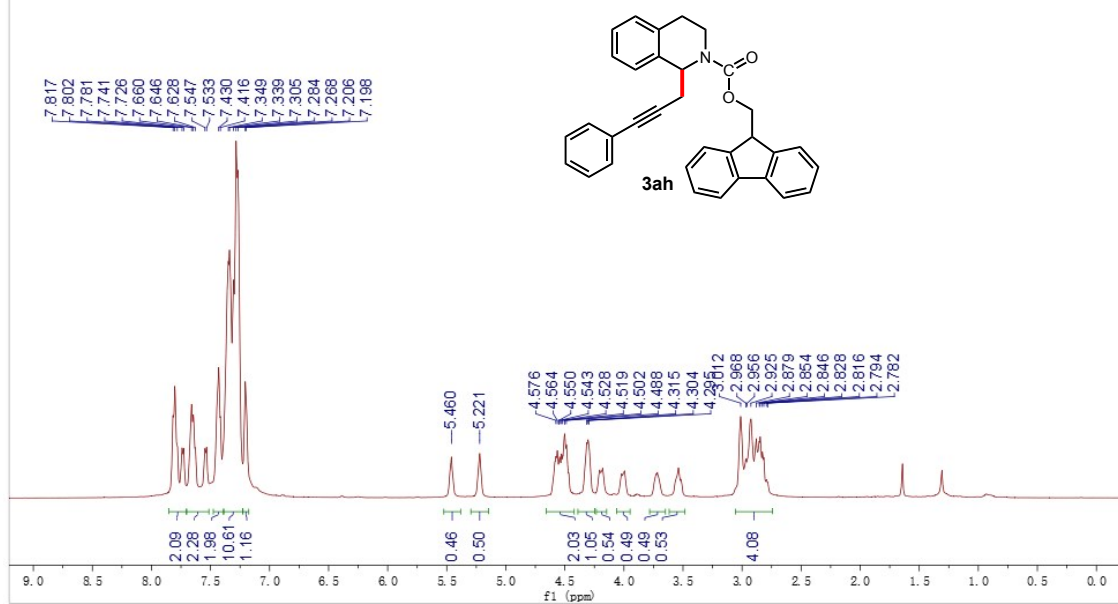

wyd-3-63 C

<sup>13</sup>C NMR (125 MHz, CDCl<sub>3</sub>)

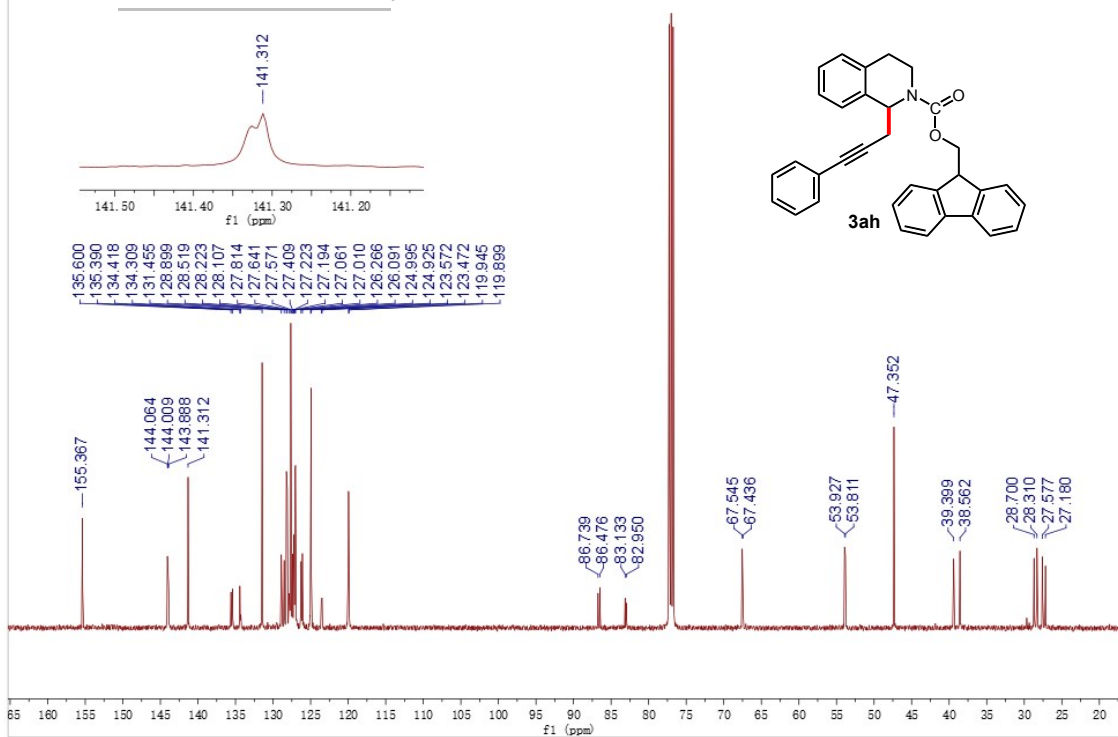

wyd-3-132 H

### <sup>1</sup>H NMR (400 MHz, CDCl<sub>3</sub>)

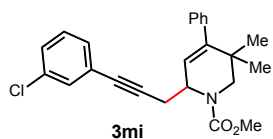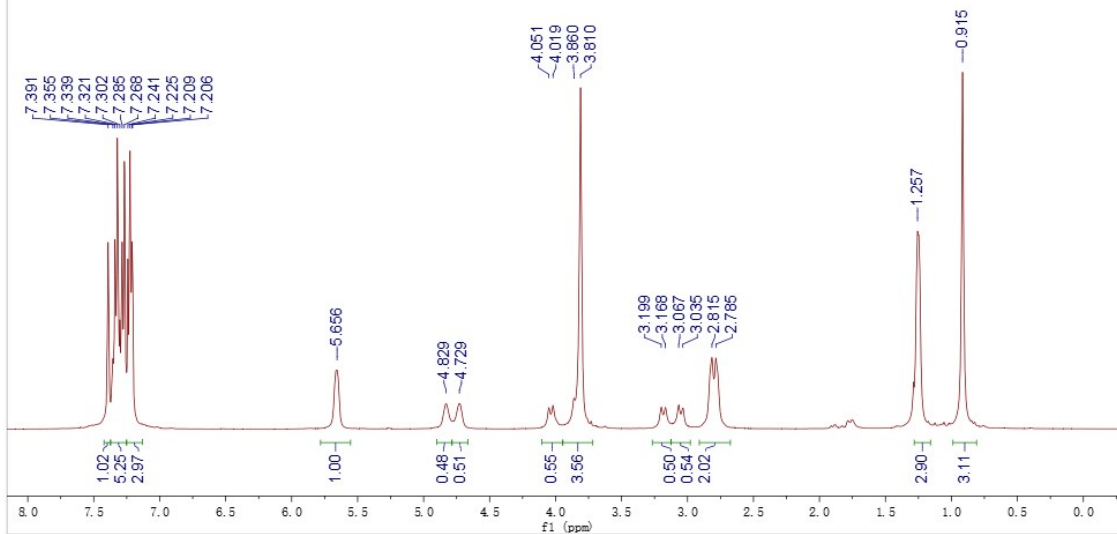

wyd-3-132 C

### <sup>13</sup>C NMR (100 MHz, CDCl<sub>3</sub>)

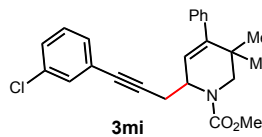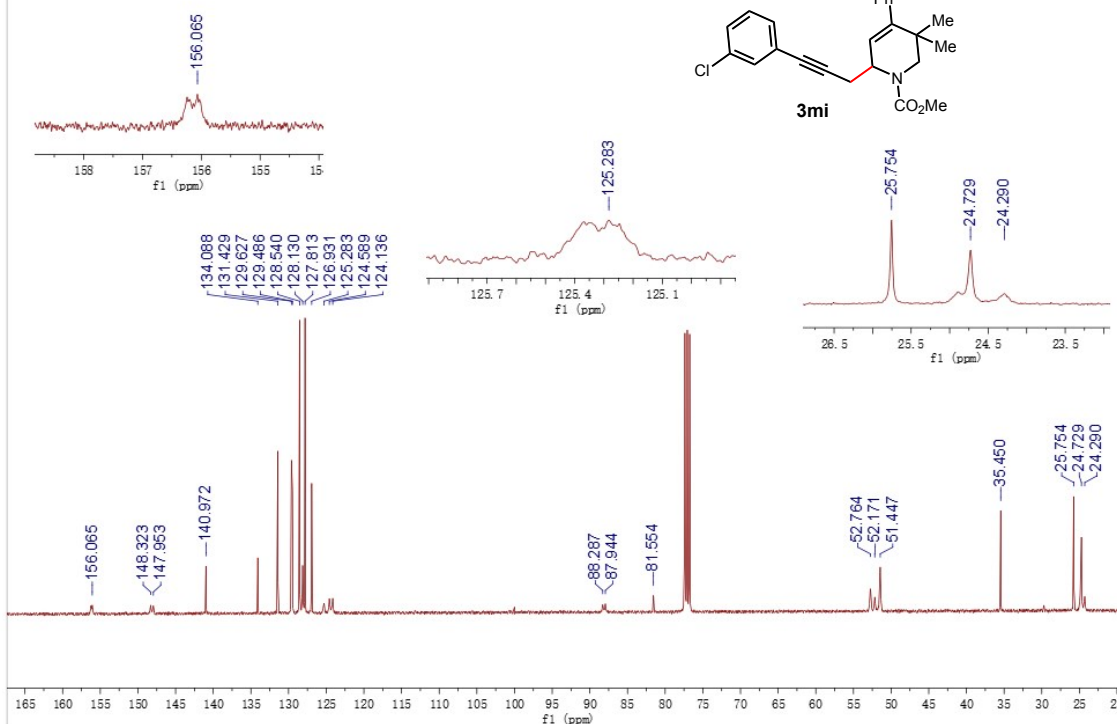

WYD-3-145 H

<sup>1</sup>H NMR (500 MHz, CDCl<sub>3</sub>)

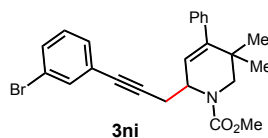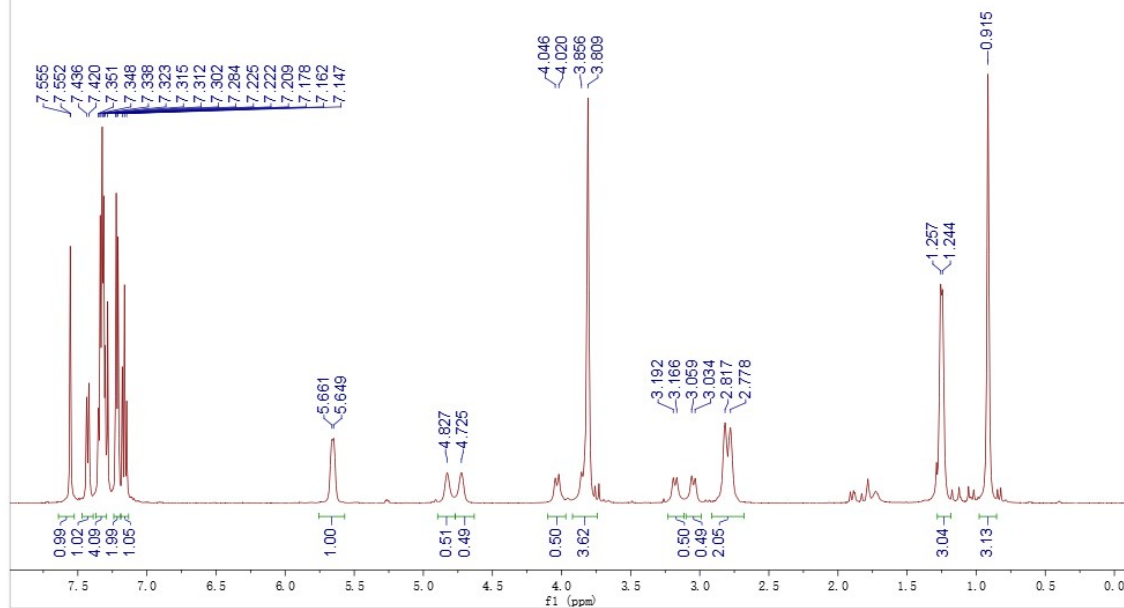

WYD-3-145 C

<sup>13</sup>C NMR (125 MHz, CDCl<sub>3</sub>)

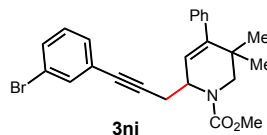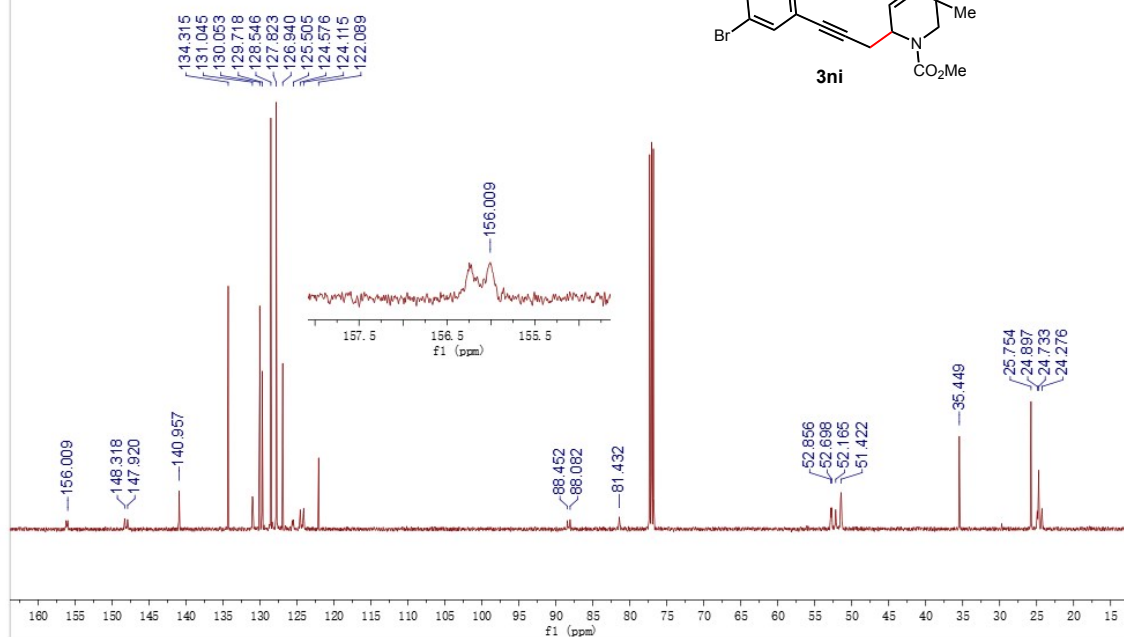

wyd-3-134 H

$^1\text{H}$  NMR (400 MHz,  $\text{CDCl}_3$ )

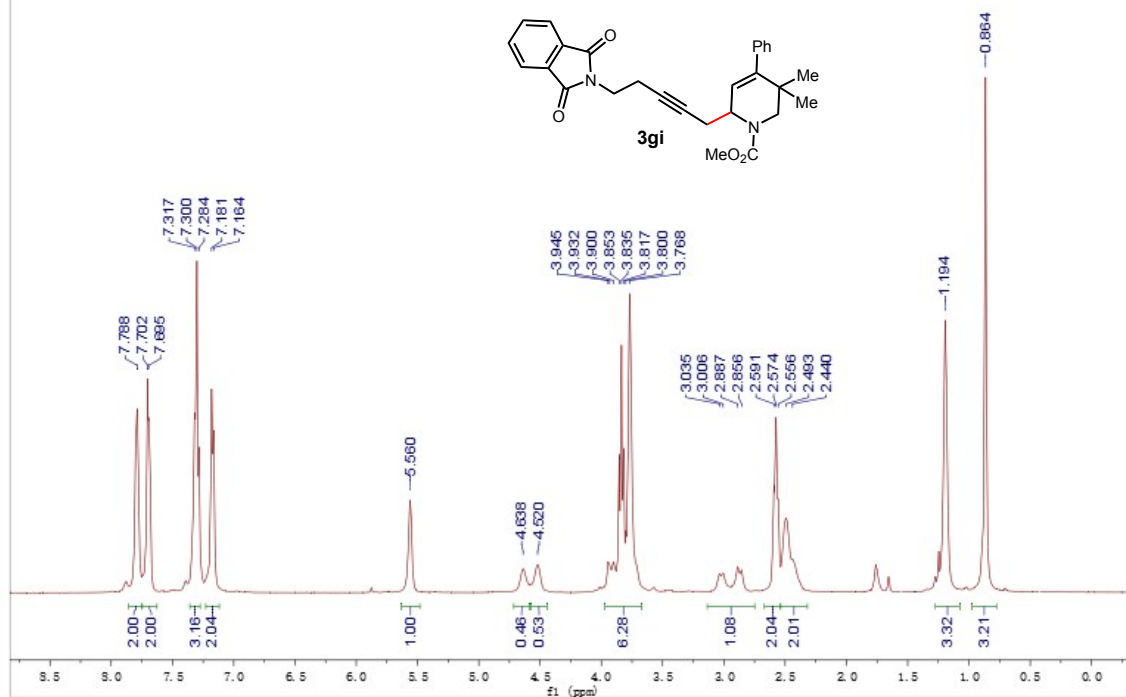

wyd-3-134 C

$^{13}\text{C}$  NMR (100 MHz,  $\text{CDCl}_3$ )

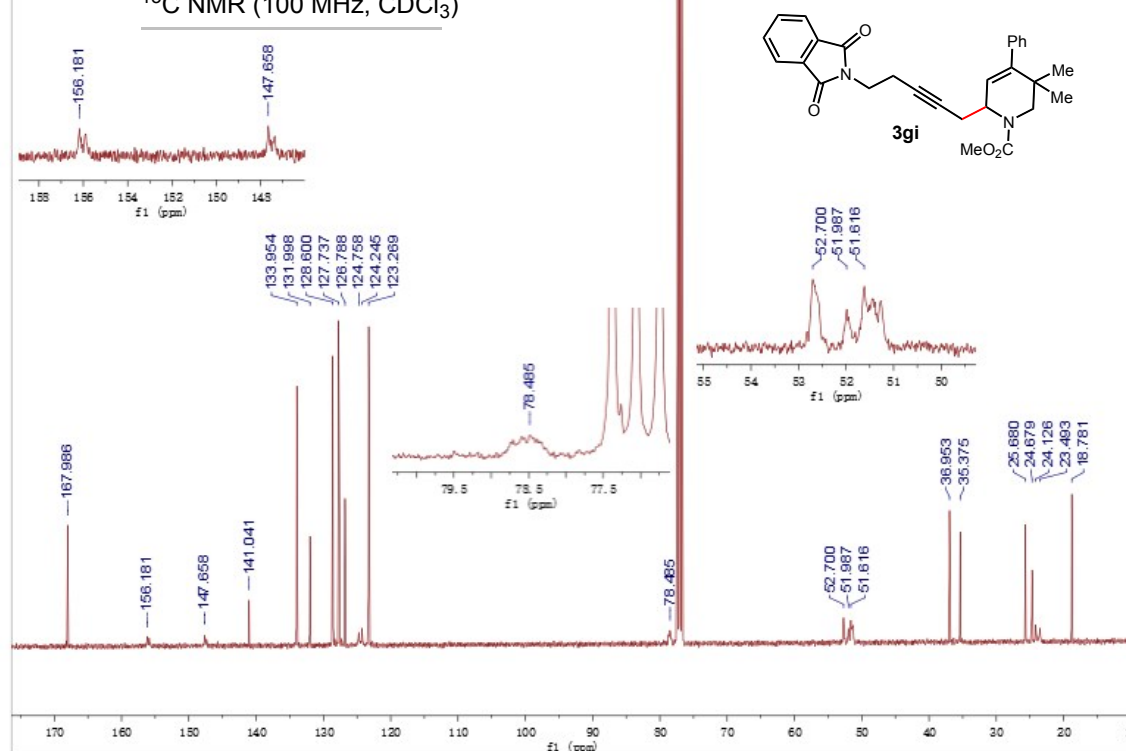

wyd-3-147 H

<sup>1</sup>H NMR (500 MHz, CDCl<sub>3</sub>)

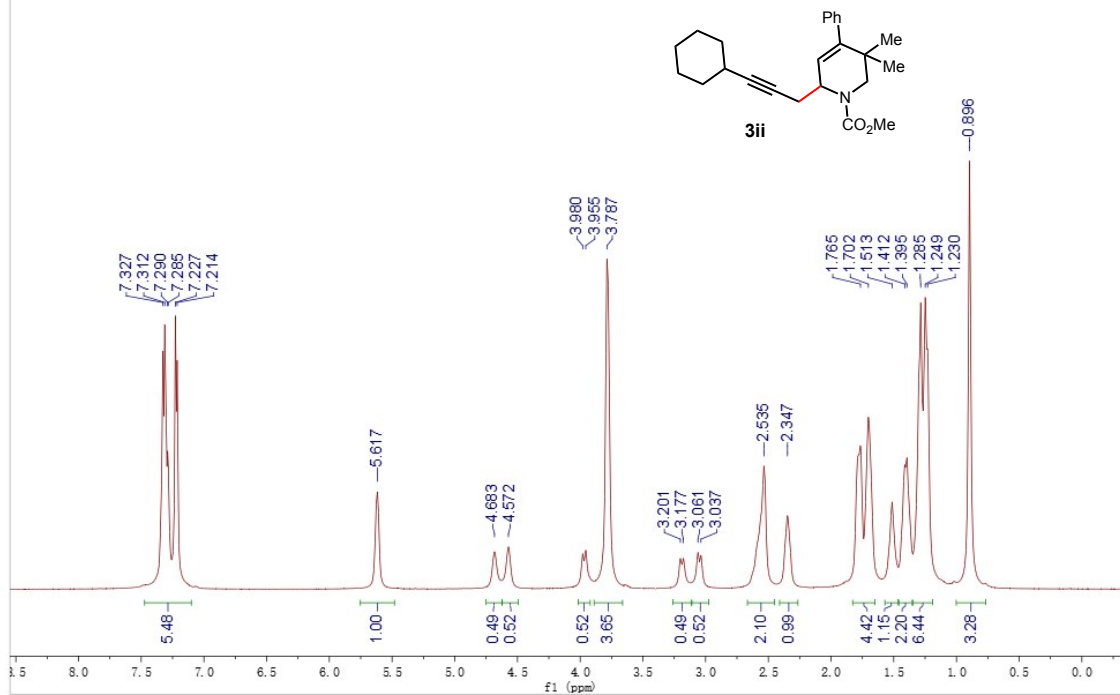

wyd-3-147 C

<sup>13</sup>C NMR (125 MHz, CDCl<sub>3</sub>)

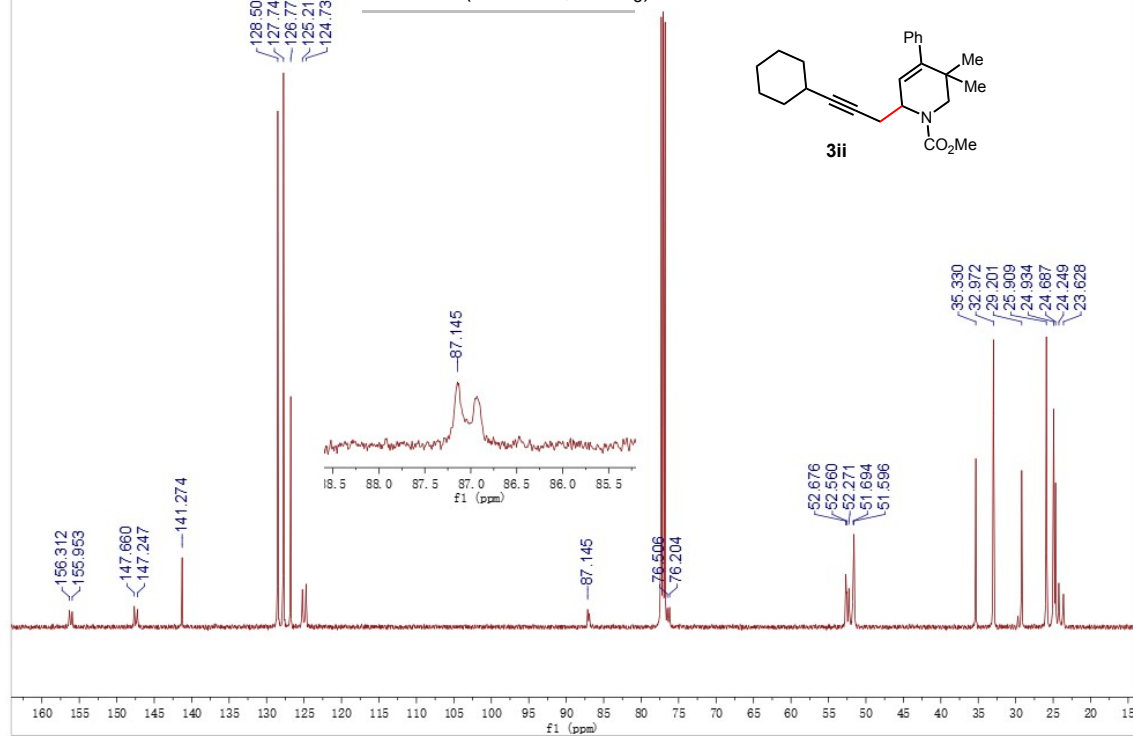

wyd-3-142 H

<sup>1</sup>H NMR (500 MHz, CDCl<sub>3</sub>)

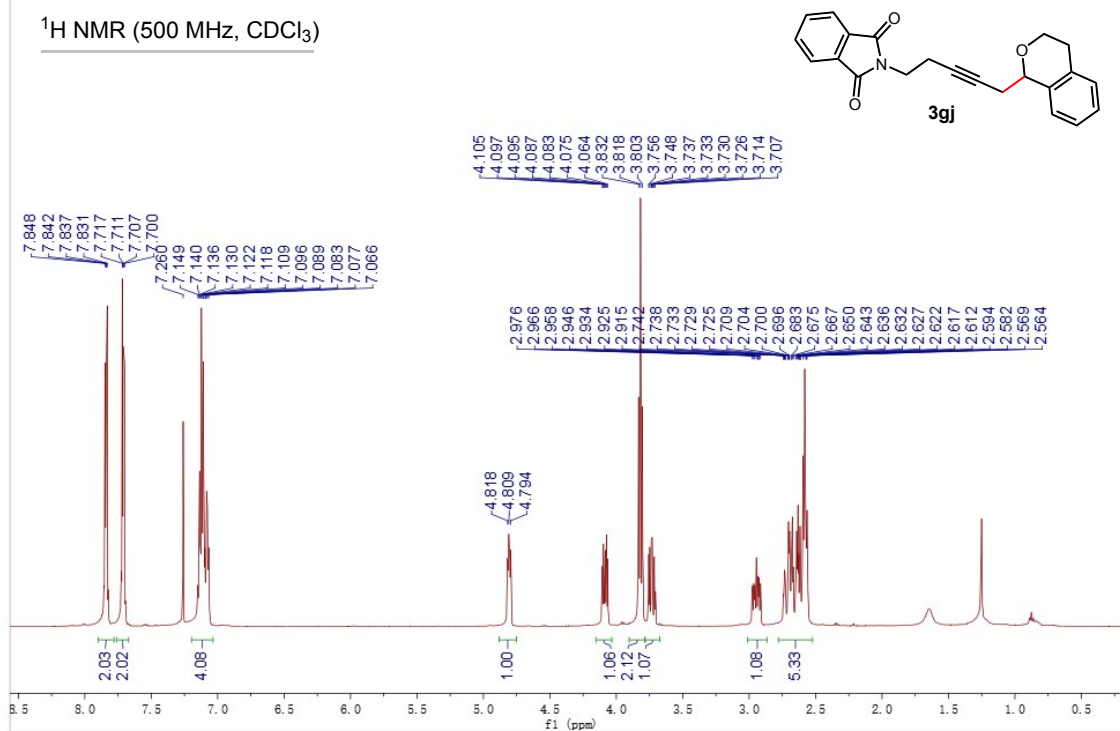

wyd-3-142 C

<sup>13</sup>C NMR (125 MHz, CDCl<sub>3</sub>)

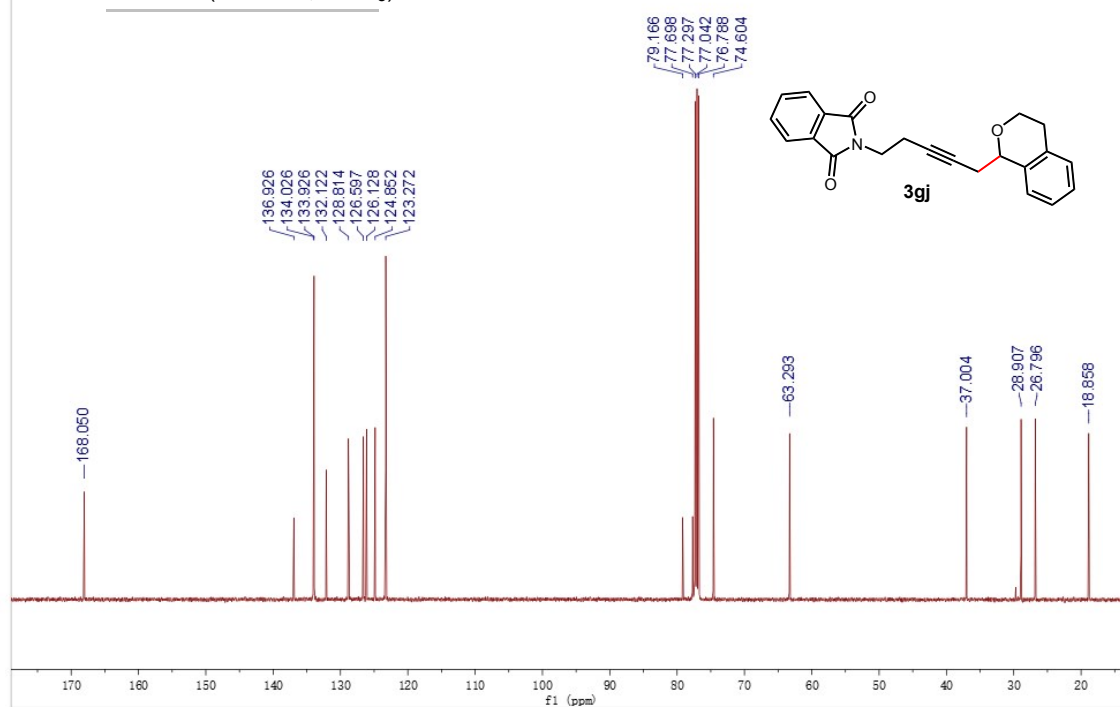

wyd-3-155 H

<sup>1</sup>H NMR (500 MHz, CDCl<sub>3</sub>)

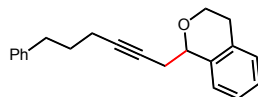

3jj

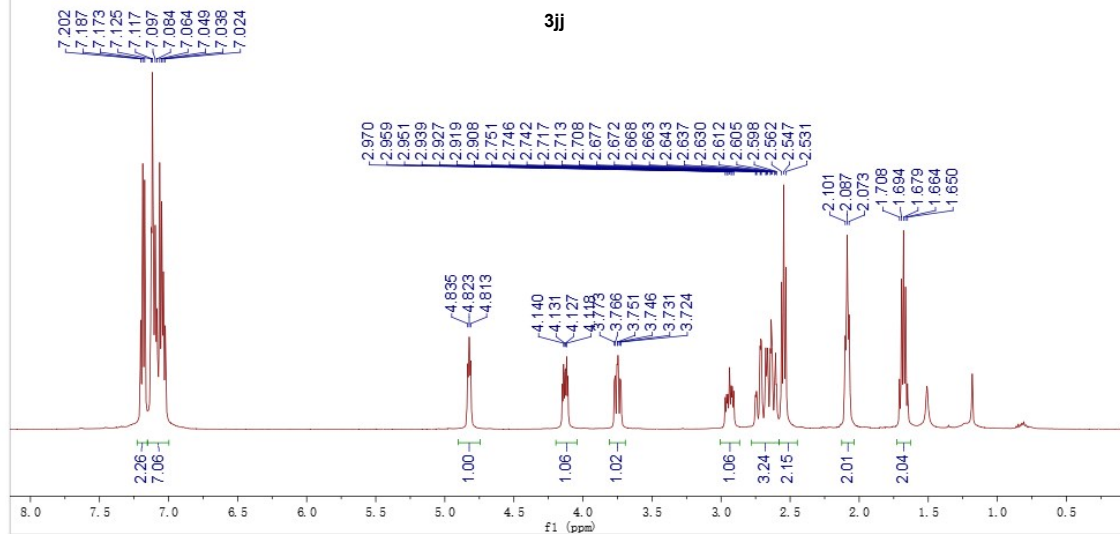

wyd-3-155 C

<sup>13</sup>C NMR (125 MHz, CDCl<sub>3</sub>)

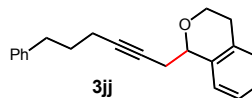

3jj

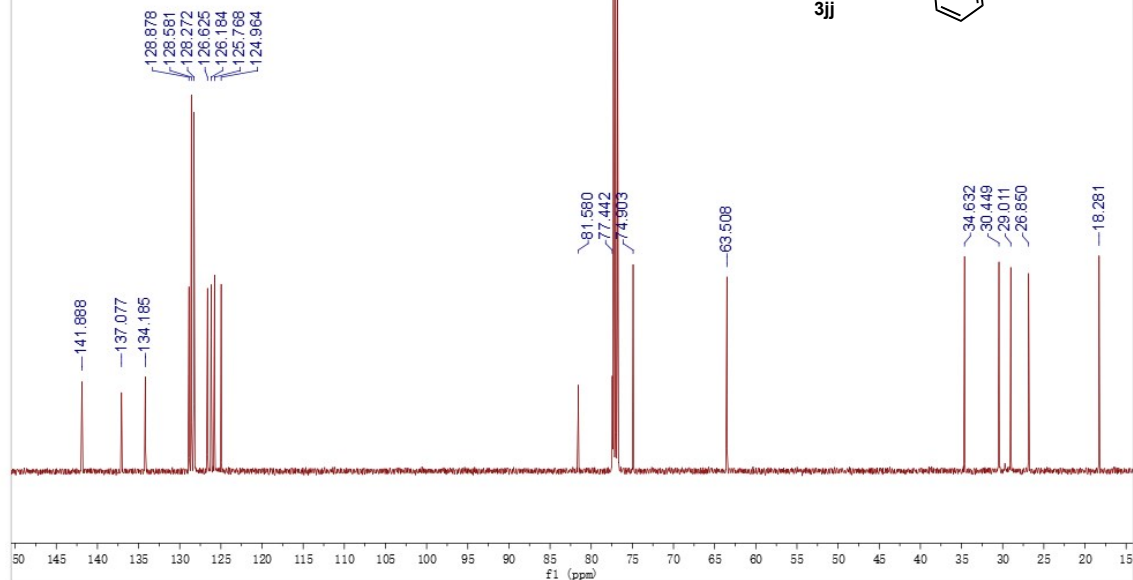

wyd-3-148 H

<sup>1</sup>H NMR (500 MHz, CDCl<sub>3</sub>)

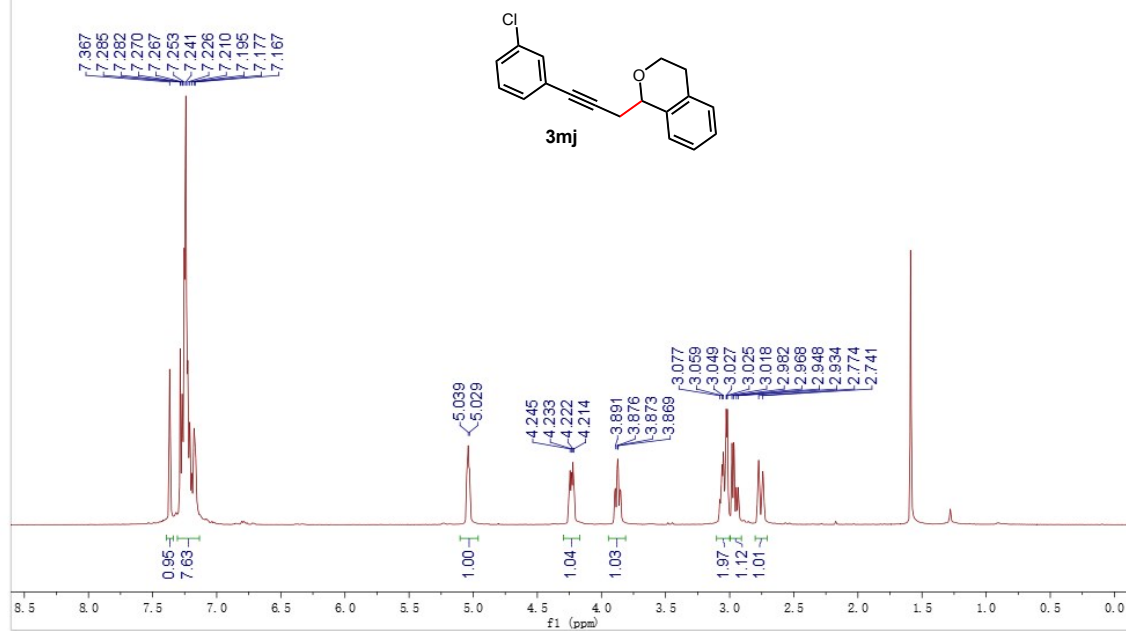

wyd-3-148 C

<sup>13</sup>C NMR (125 MHz, CDCl<sub>3</sub>)

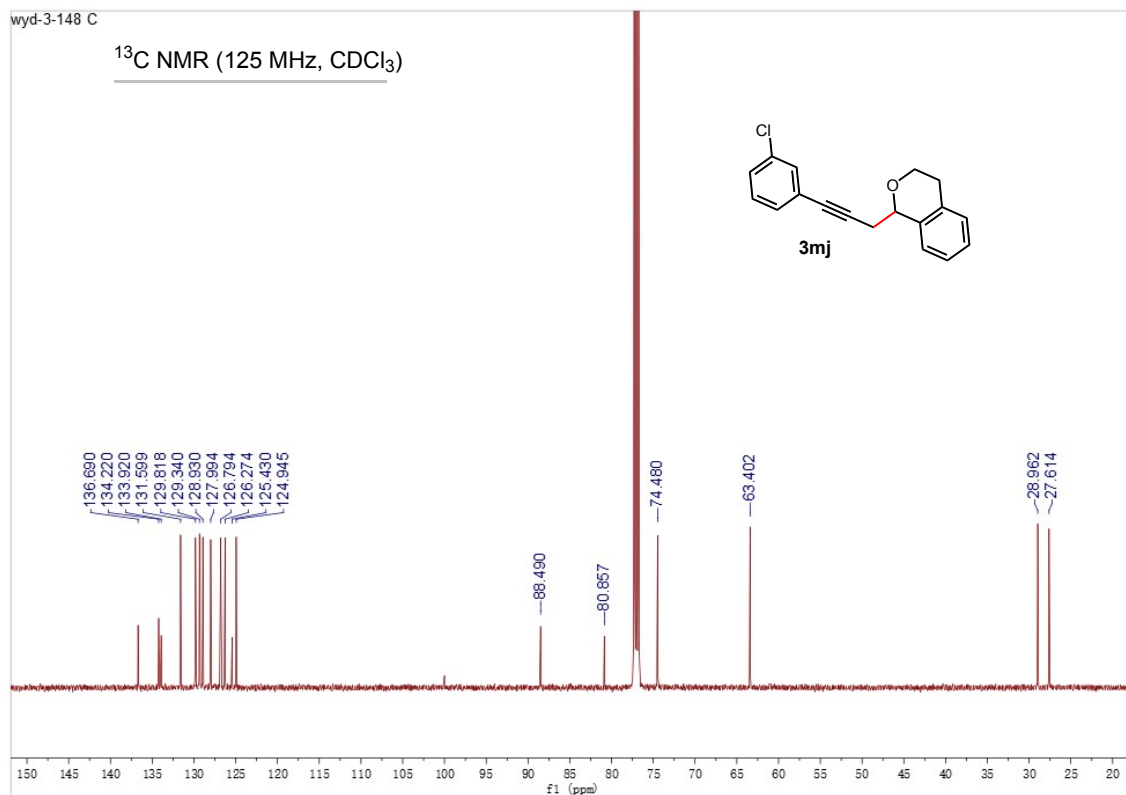



wyd-5-1-1 H

<sup>1</sup>H NMR (500 MHz, CDCl<sub>3</sub>)

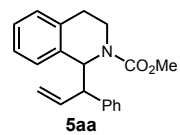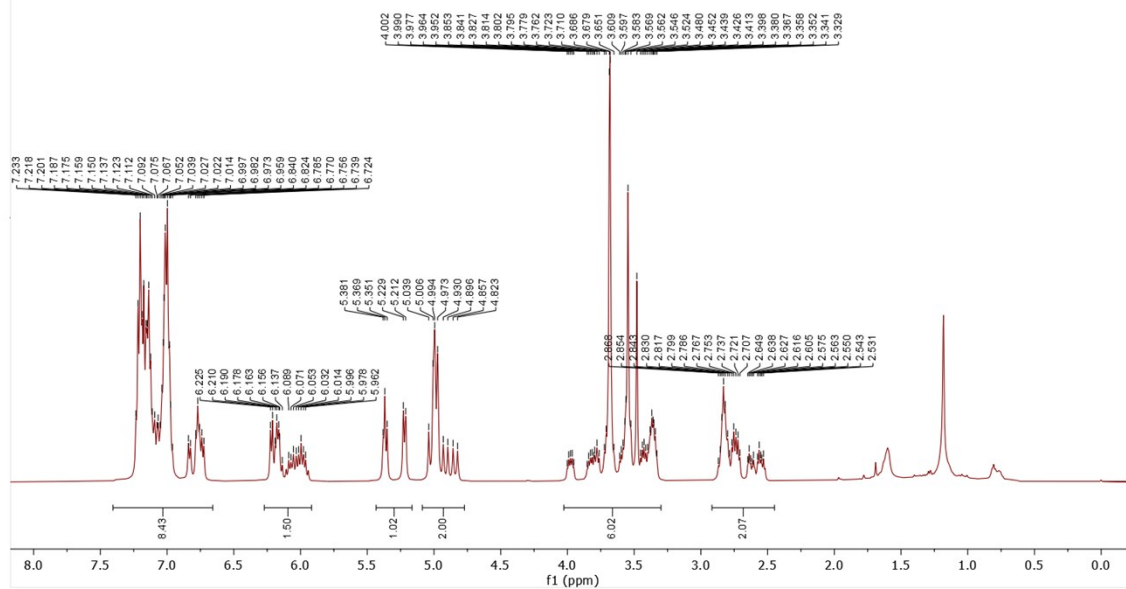

wyd-5-1-1 C

<sup>13</sup>C NMR (125 MHz, CDCl<sub>3</sub>)

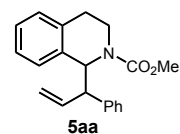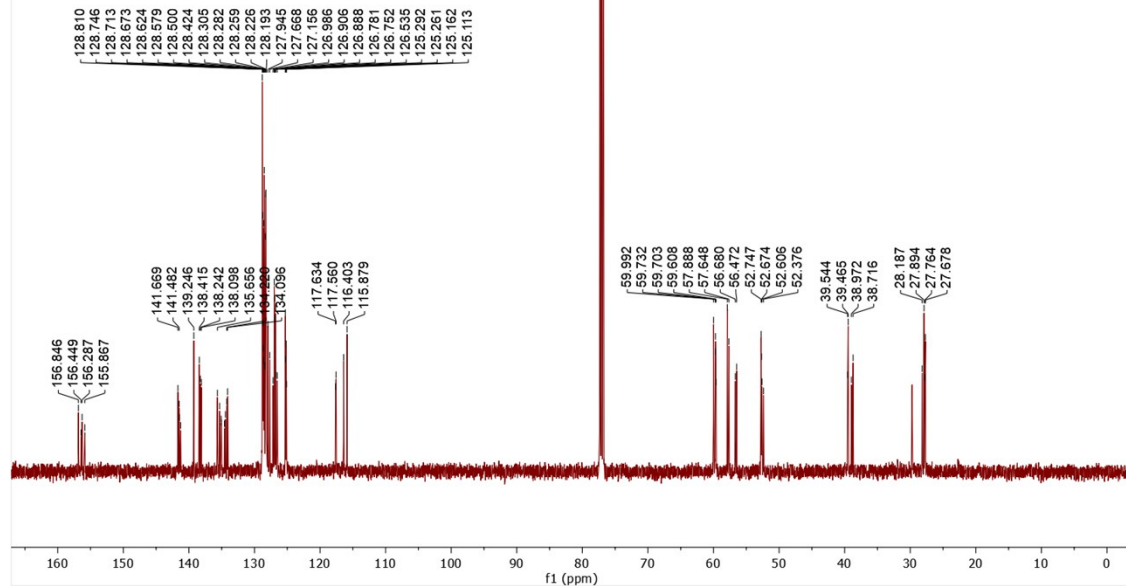

wyd-5-4-1 H

$^1\text{H NMR}$  (500 MHz,  $\text{CDCl}_3$ )

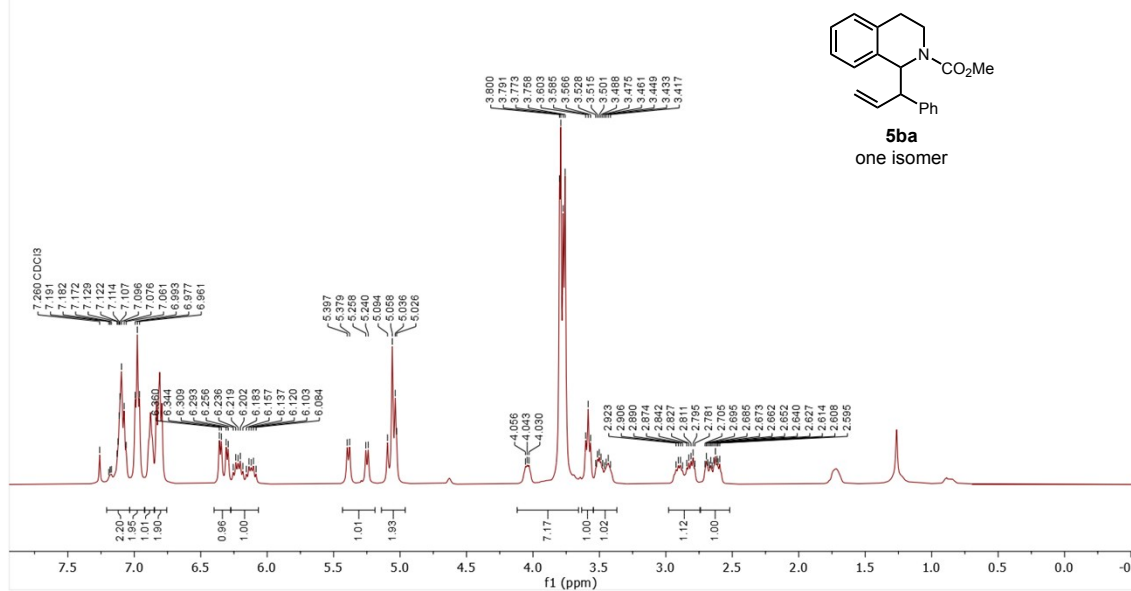

wyd-5-4-1 C

$^{13}\text{C NMR}$  (125 MHz,  $\text{CDCl}_3$ )

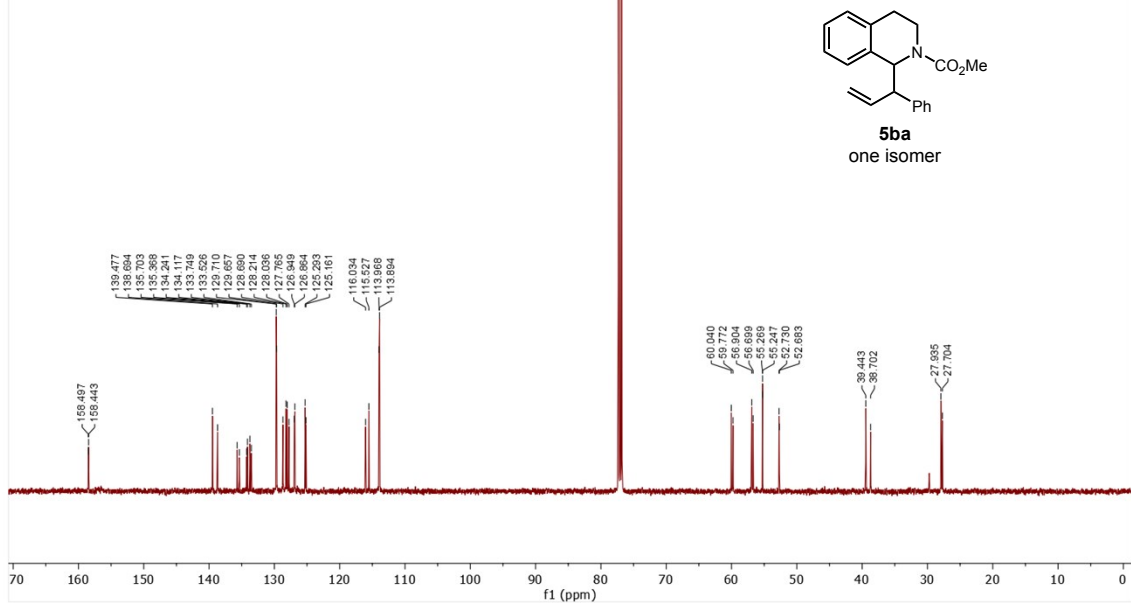

wyd-5-4-2 H

$^1\text{H}$  NMR (500 MHz,  $\text{CDCl}_3$ )

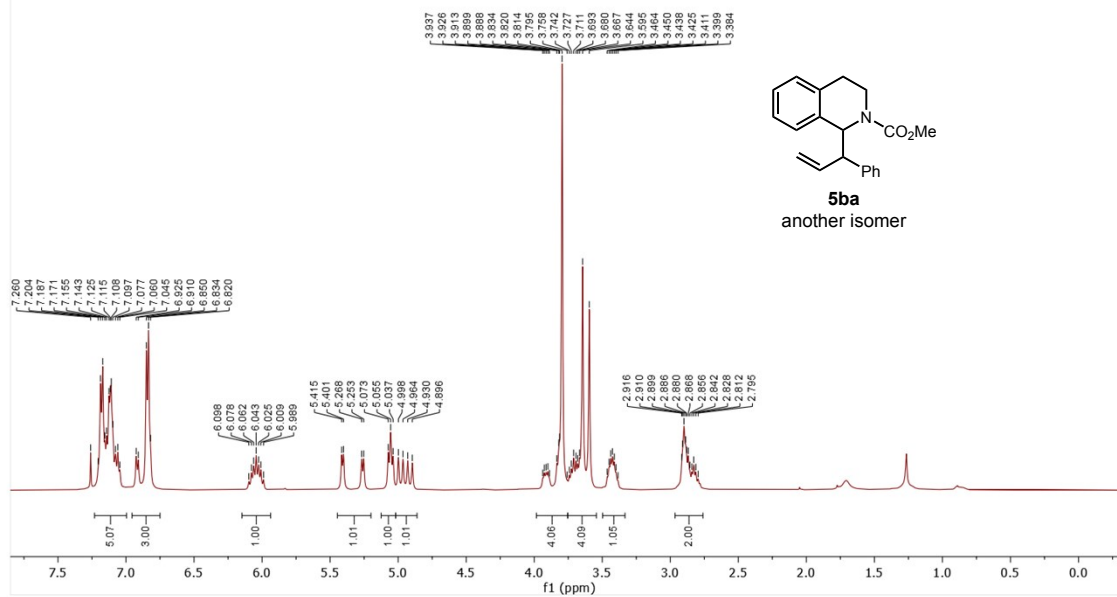

wyd-5-4-2 C

$^{13}\text{C}$  NMR (125 MHz,  $\text{CDCl}_3$ )

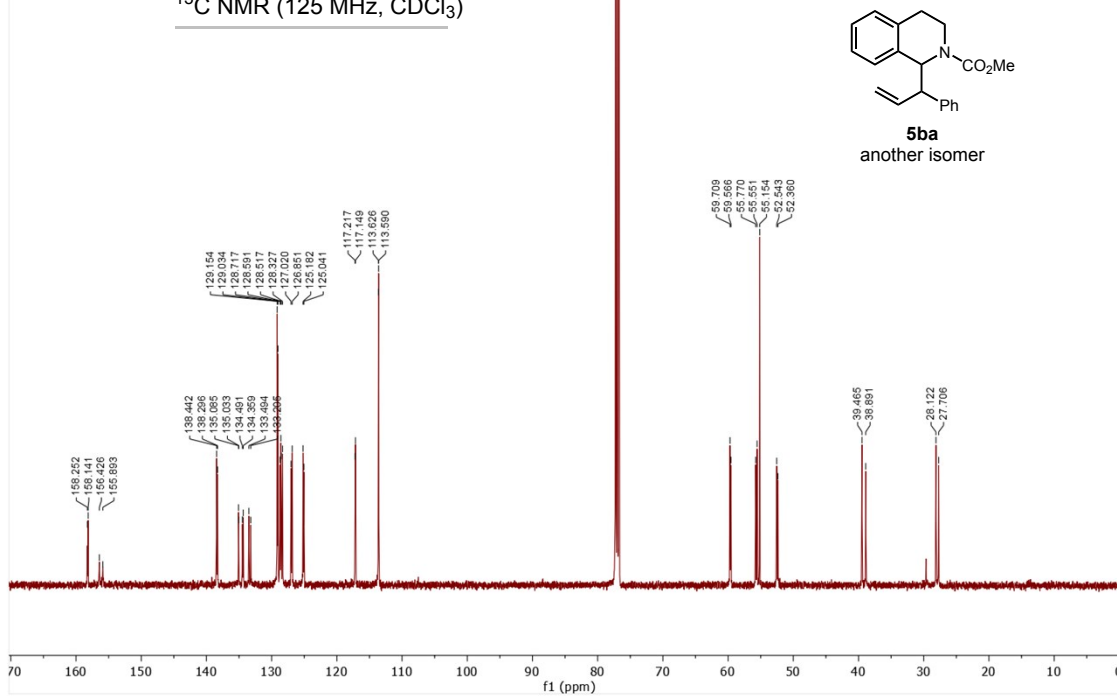

wyd-5-12-1 H

<sup>1</sup>H NMR (500 MHz, CDCl<sub>3</sub>)

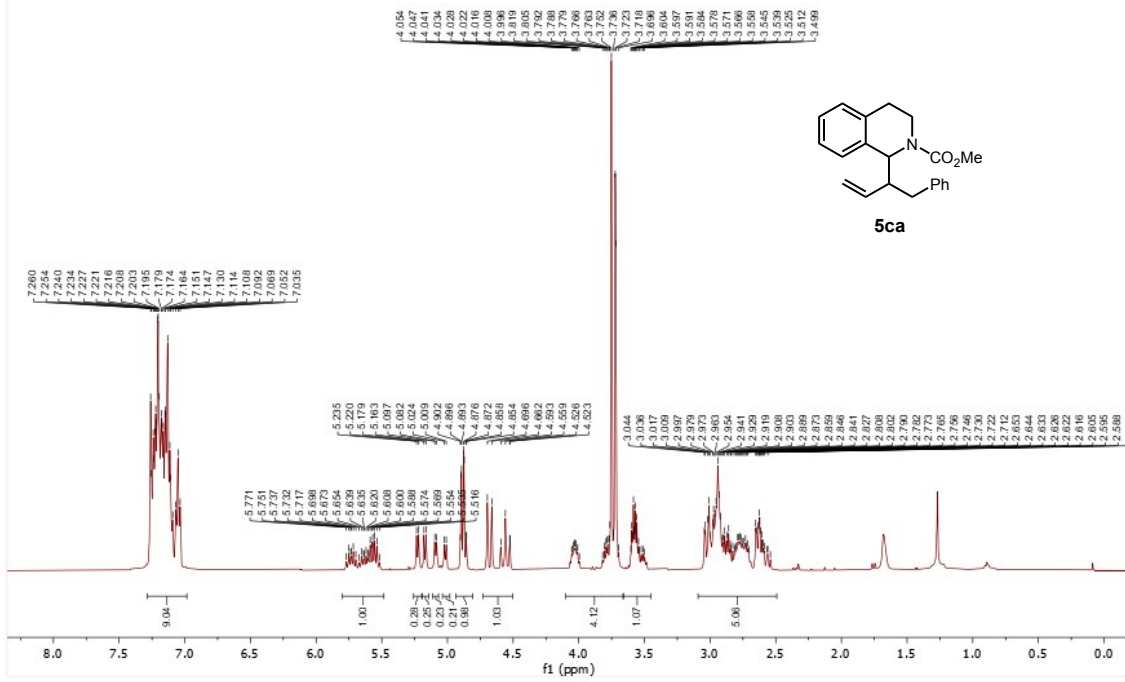

wyd-5-12-1 C

<sup>13</sup>C NMR (125 MHz, CDCl<sub>3</sub>)

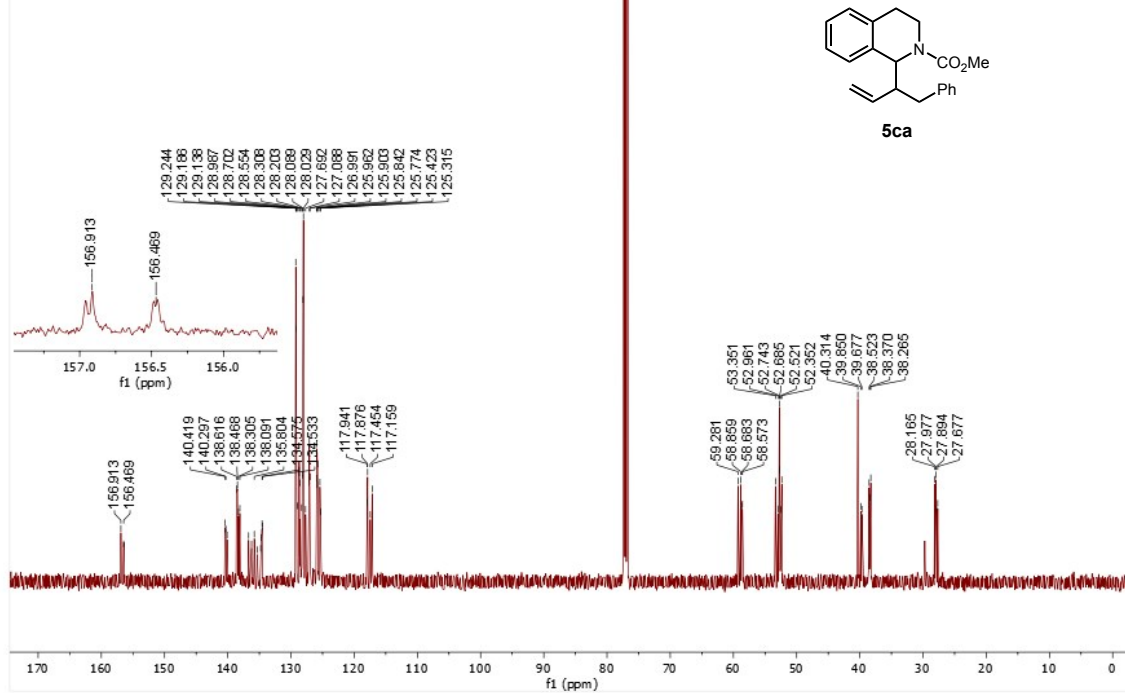

wyd-5-13-1 H

### <sup>1</sup>H NMR (500 MHz, CDCl<sub>3</sub>)

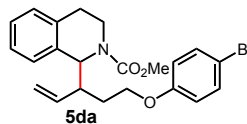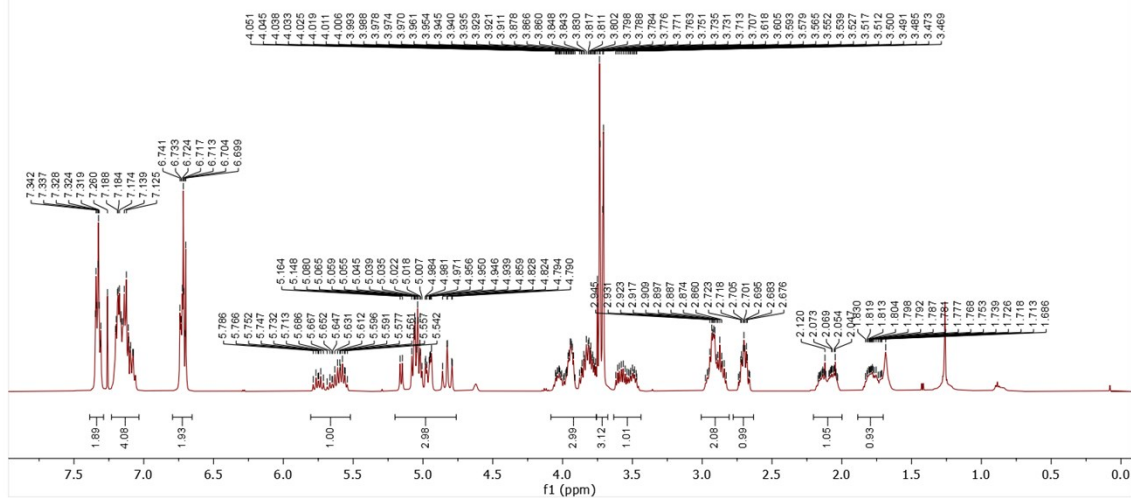

wyd-5-13-1 C

### <sup>13</sup>C NMR (125 MHz, CDCl<sub>3</sub>)

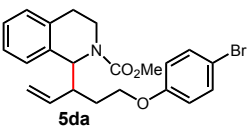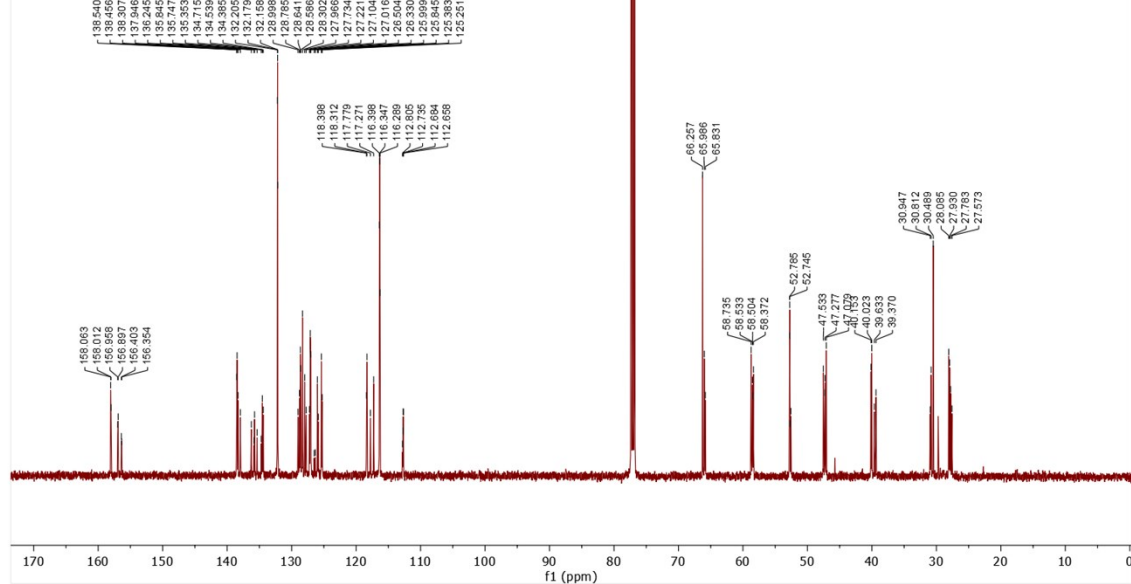

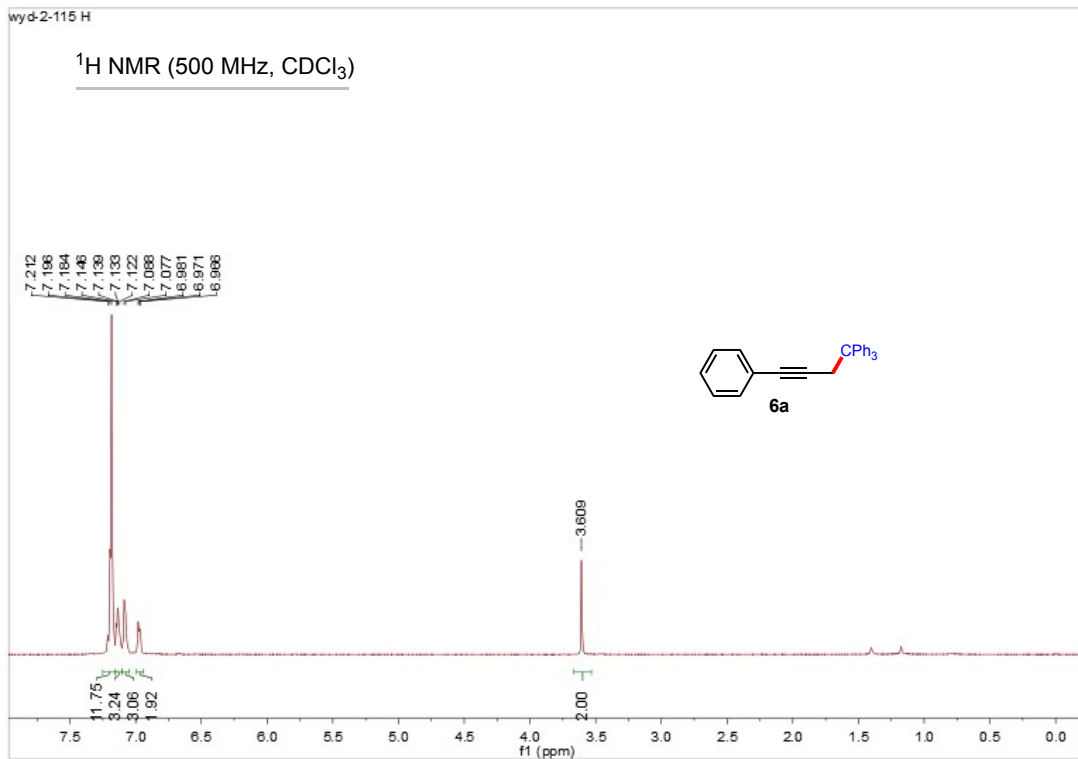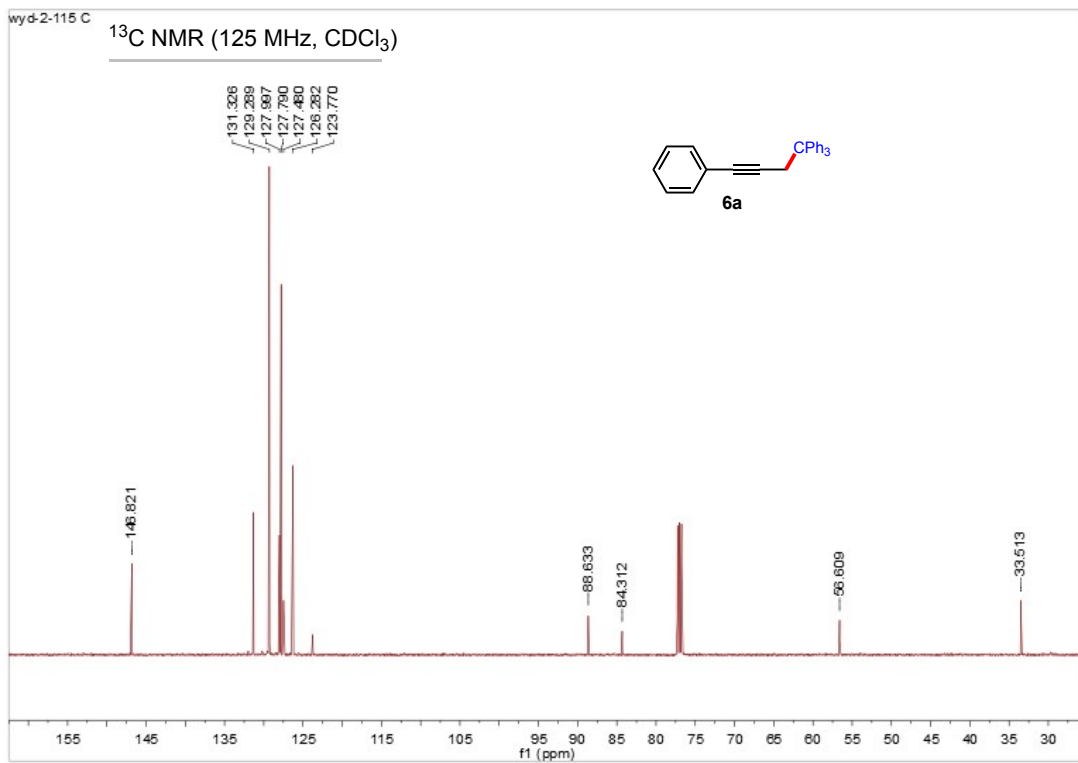

wyd-2-122 H

<sup>1</sup>H NMR (500 MHz, CDCl<sub>3</sub>)

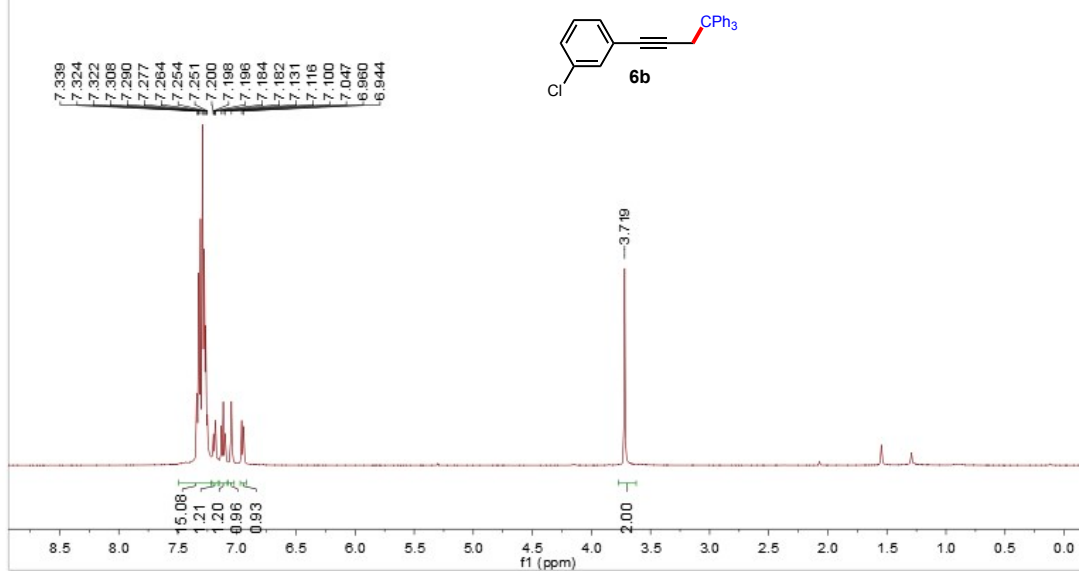

wyd-2-122 C

<sup>13</sup>C NMR (125 MHz, CDCl<sub>3</sub>)

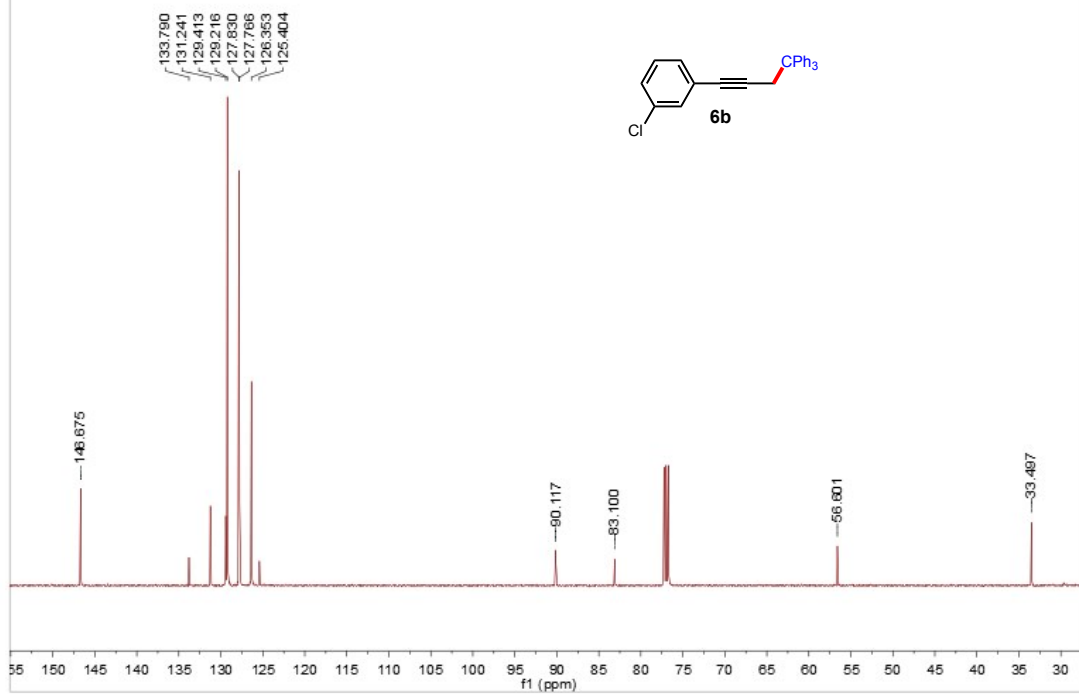

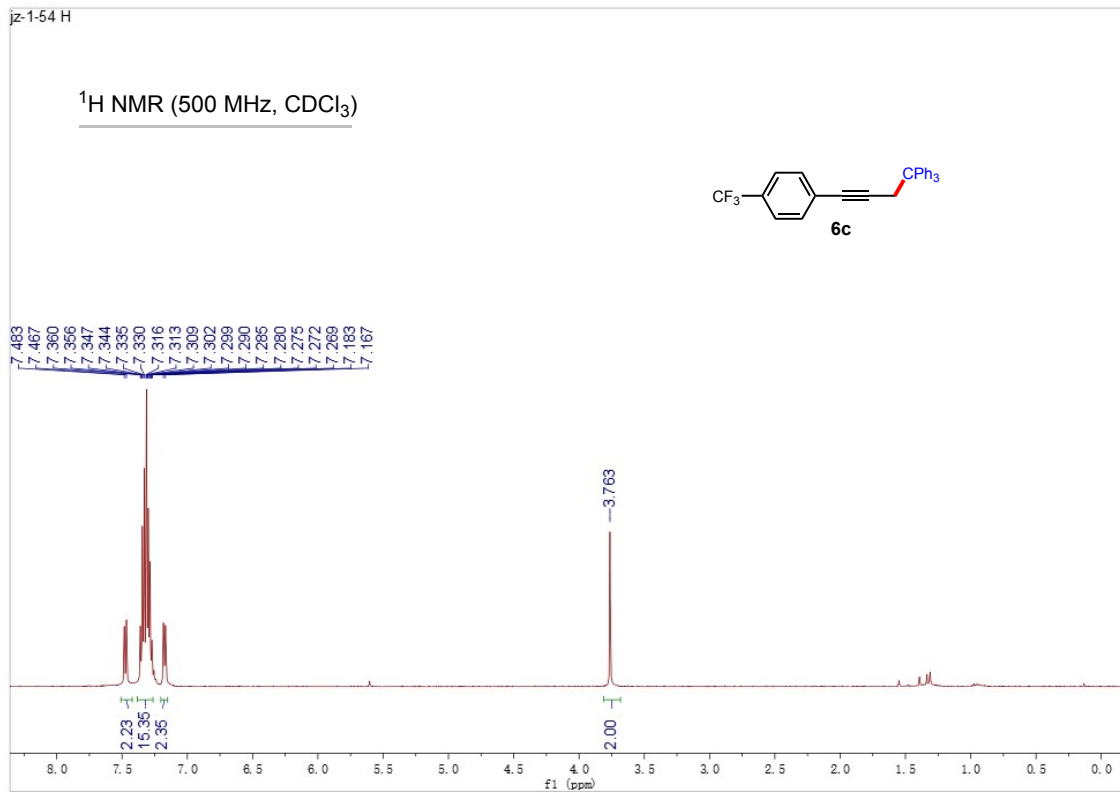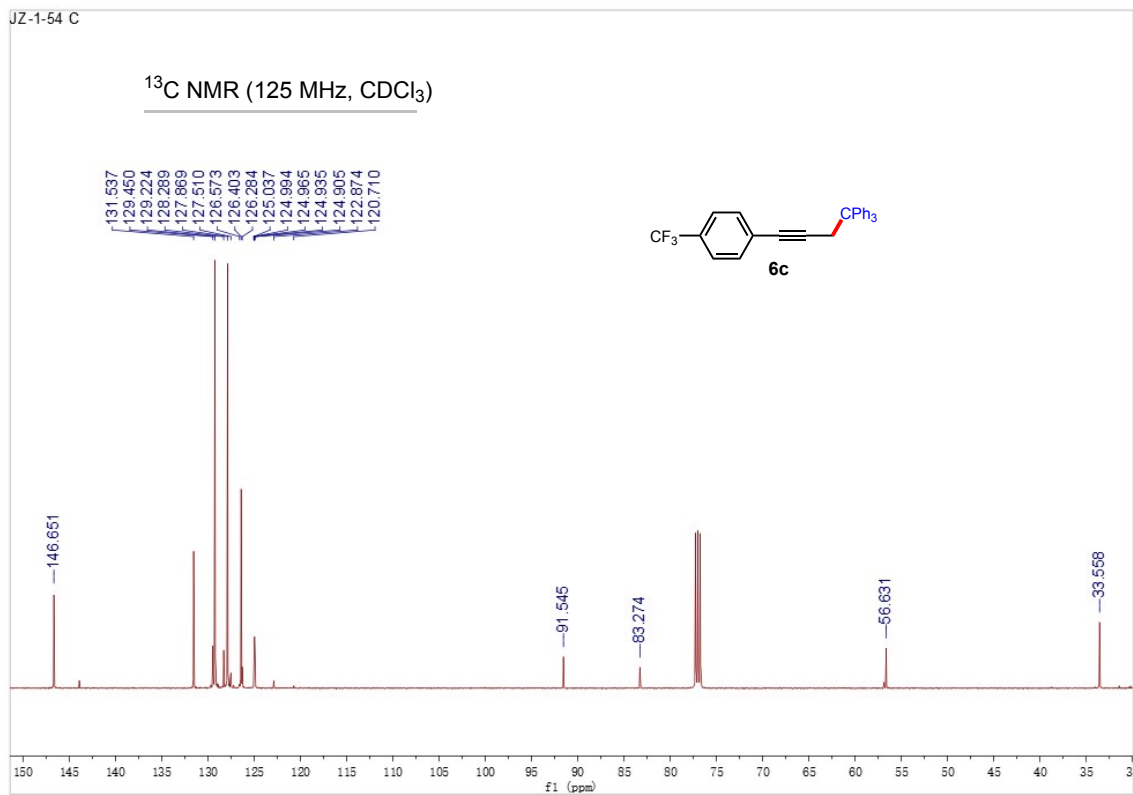



JZ-1-54 F

$^{19}\text{F}$  NMR (470 MHz,  $\text{CDCl}_3$ )

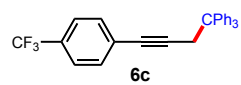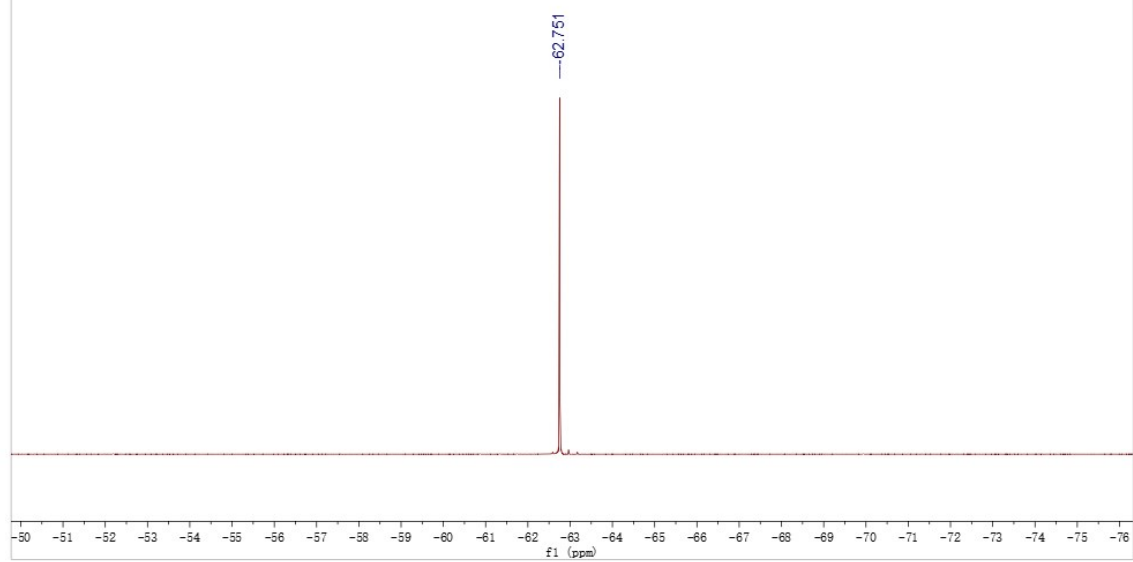

wyd-1-237 H

<sup>1</sup>H NMR (500 MHz, CDCl<sub>3</sub>)

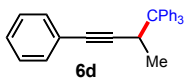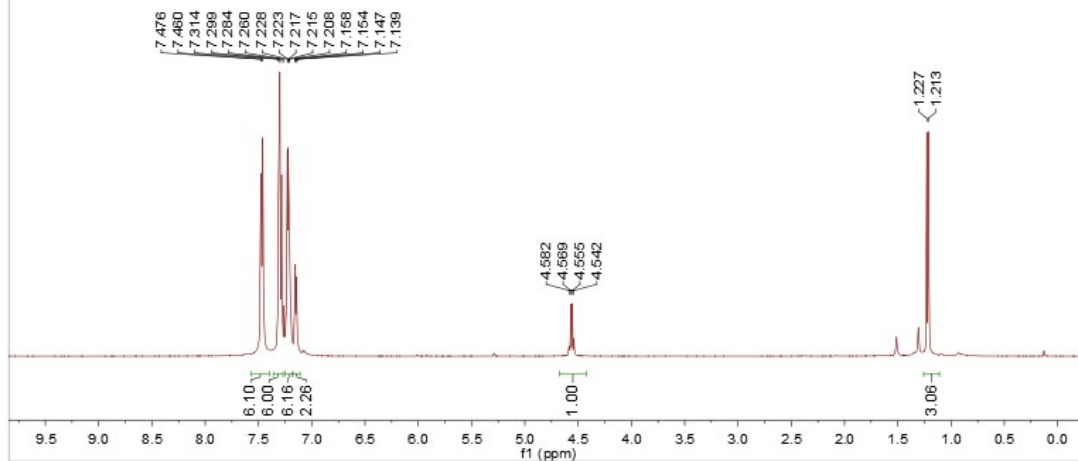

wyd-1-237 C

<sup>13</sup>C NMR (125 MHz, CDCl<sub>3</sub>)

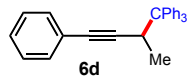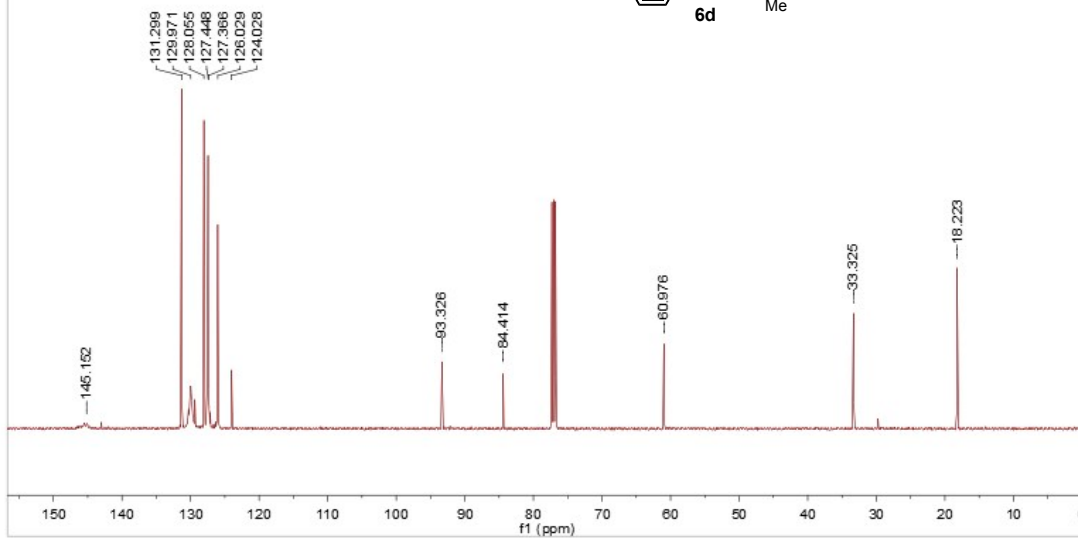

wyd-2-177 H

$^1\text{H NMR}$  (400 MHz,  $\text{CDCl}_3$ )

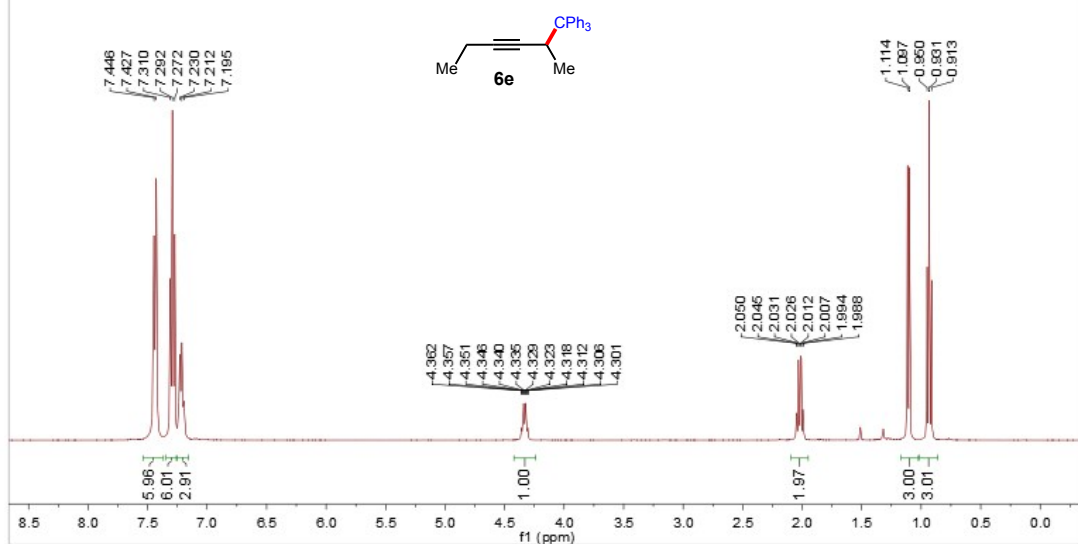

wyd-2-177 C

$^{13}\text{C NMR}$  (100 MHz,  $\text{CDCl}_3$ )

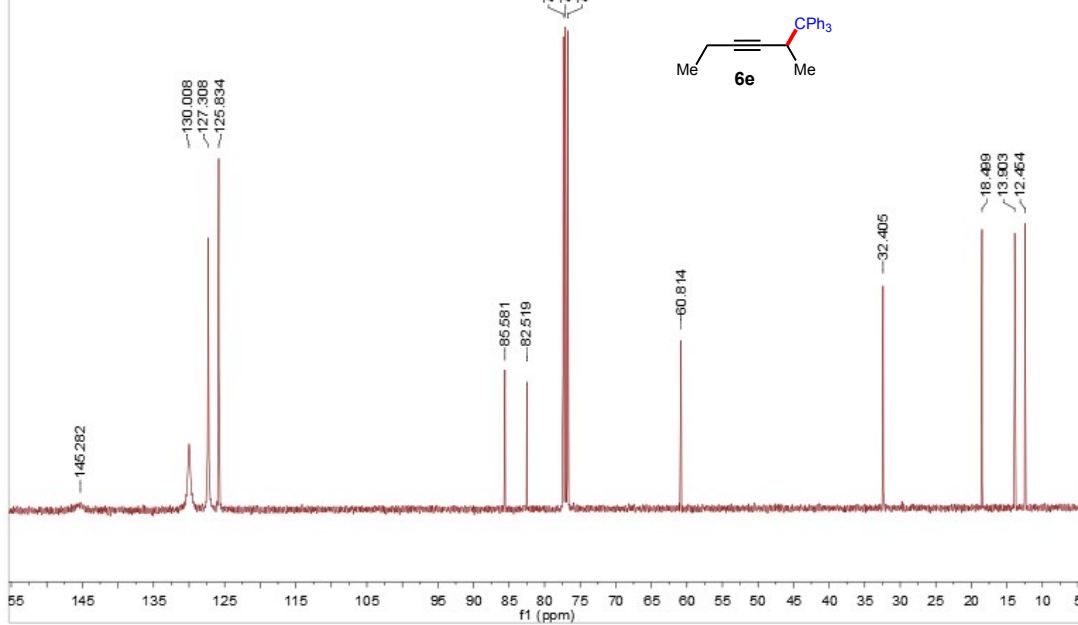

wyd-2-142 H

$^1\text{H NMR}$  (400 MHz,  $\text{CDCl}_3$ )

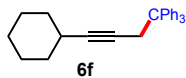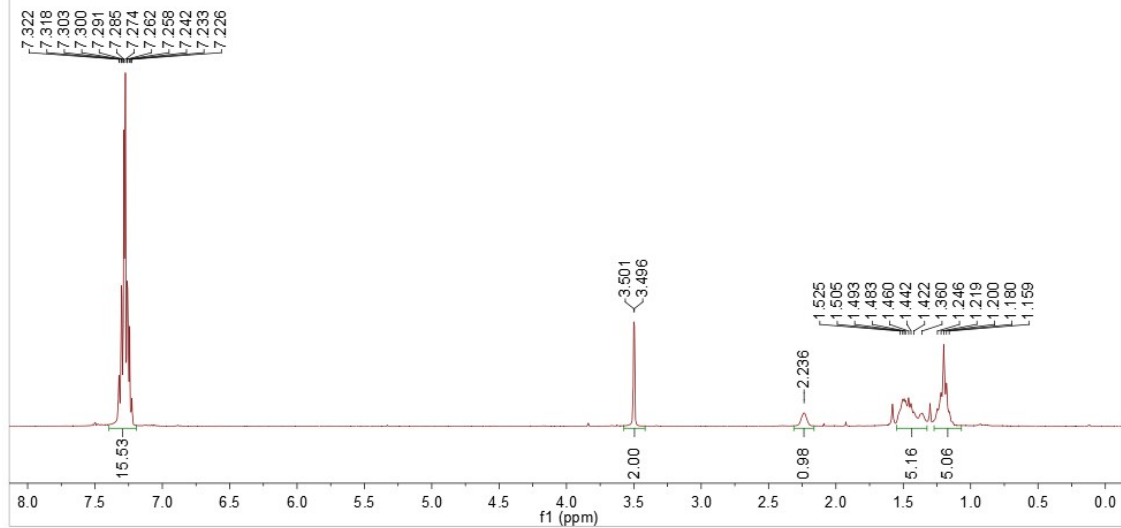

wyd-2-142 C

$^{13}\text{C NMR}$  (100 MHz,  $\text{CDCl}_3$ )

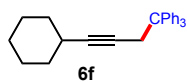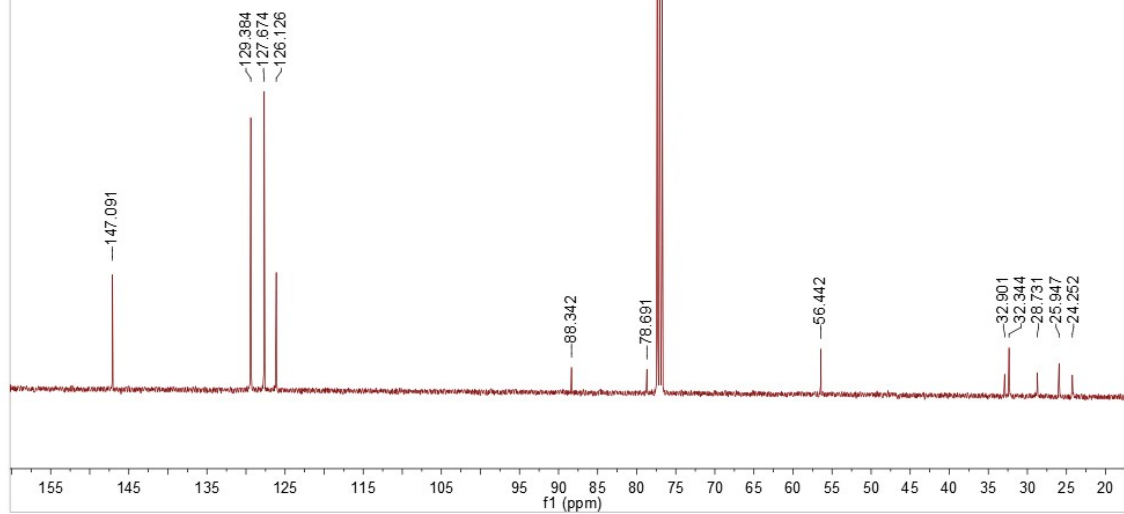

wyd-2-166 H

$^1\text{H}$  NMR (500 MHz,  $\text{CDCl}_3$ )

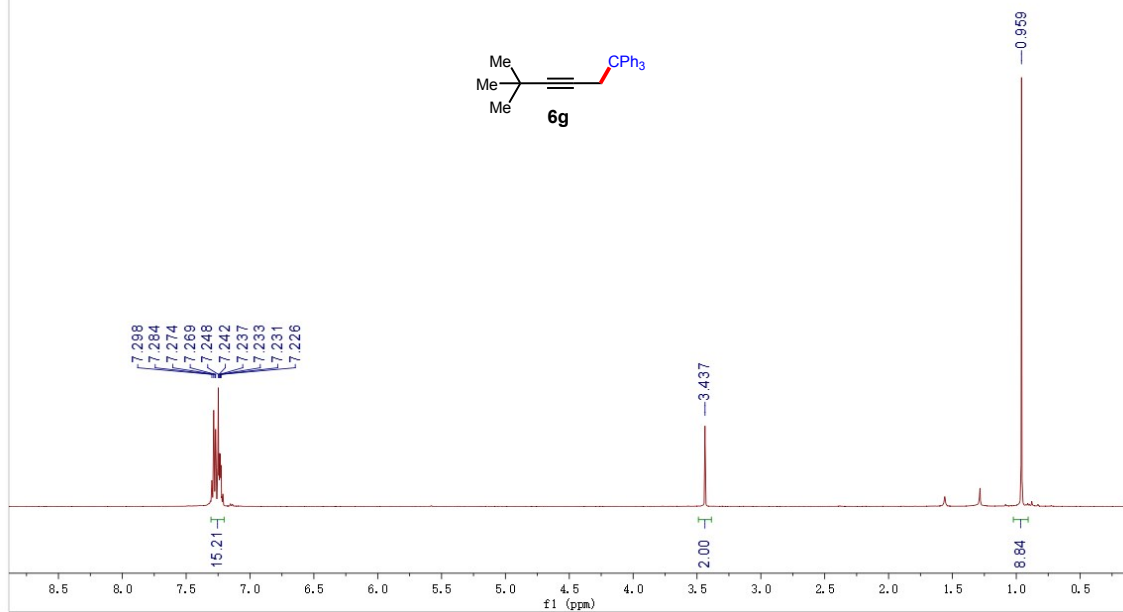

wyd-2-166 C

$^{13}\text{C}$  NMR (125 MHz,  $\text{CDCl}_3$ )

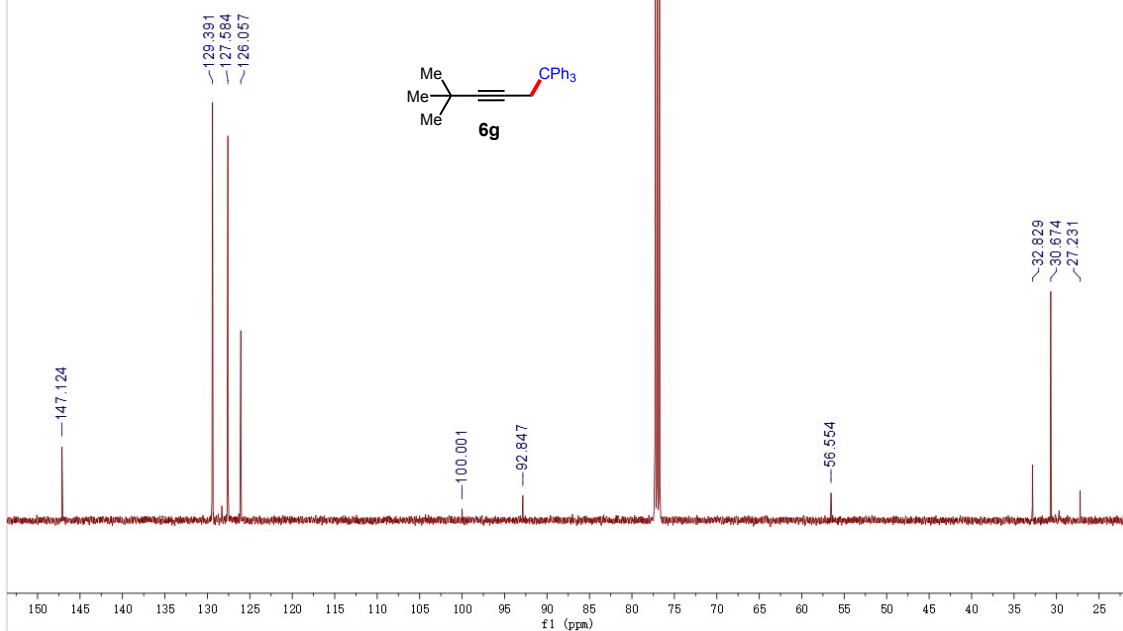

WYD-2-179-1 H

### <sup>1</sup>H NMR (400 MHz, CDCl<sub>3</sub>)

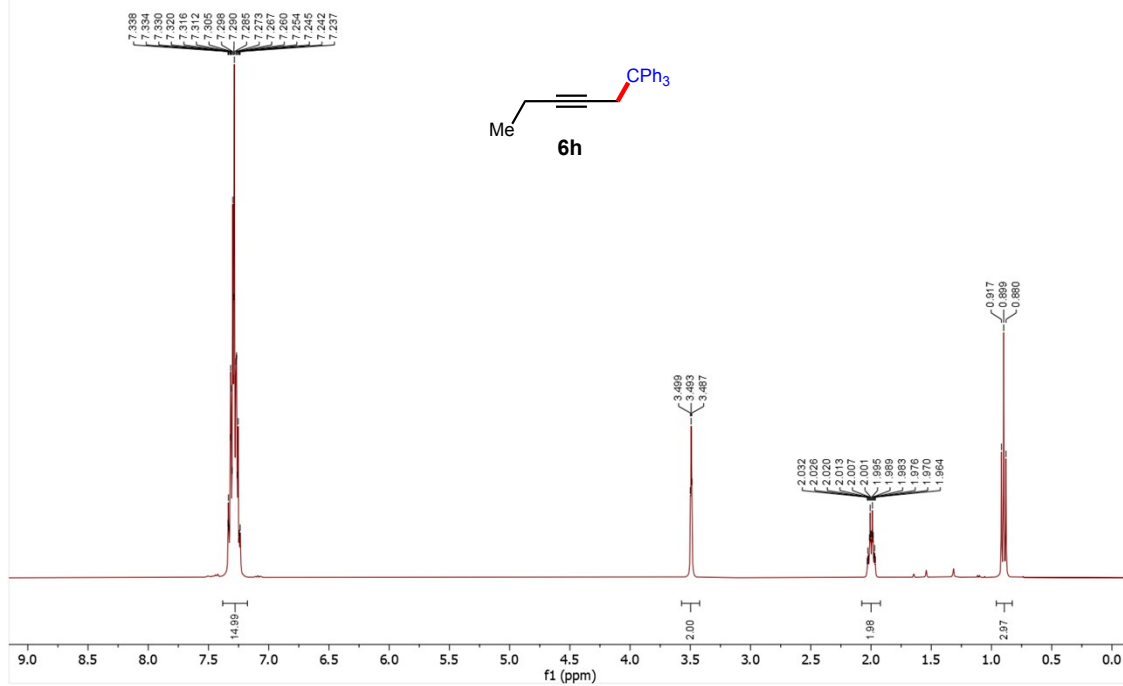

WYD-2-179-1 C

### <sup>13</sup>C NMR (100 MHz, CDCl<sub>3</sub>)

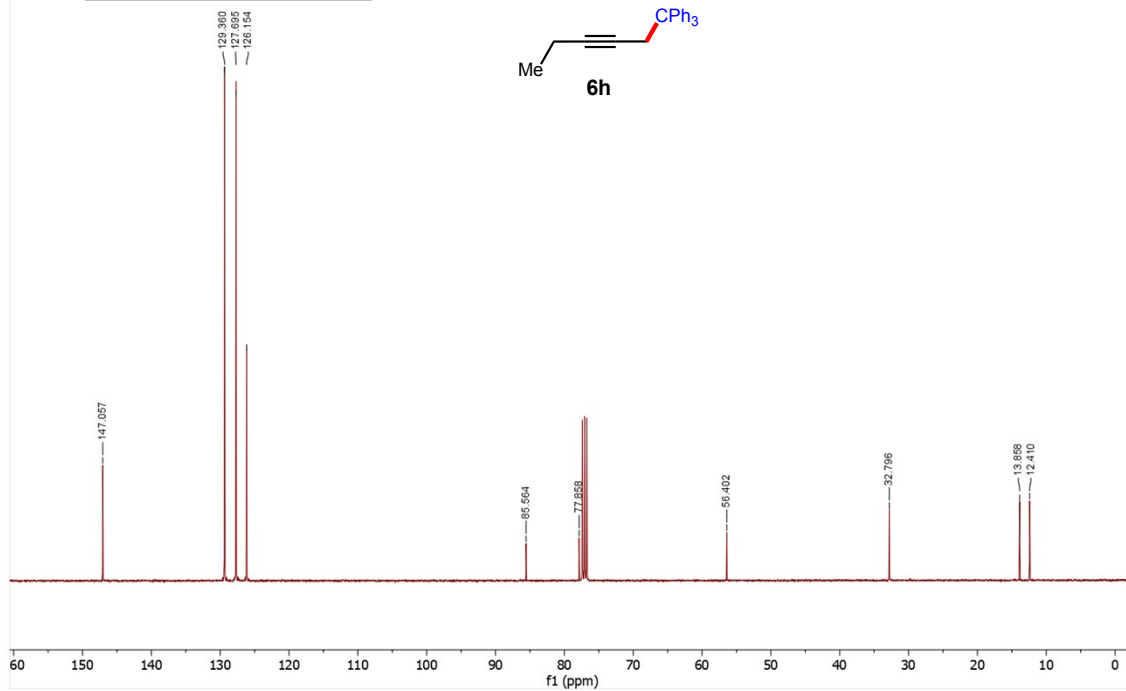

wyd-2-179-2 H

### $^1\text{H}$ NMR (400 MHz, $\text{CDCl}_3$ )

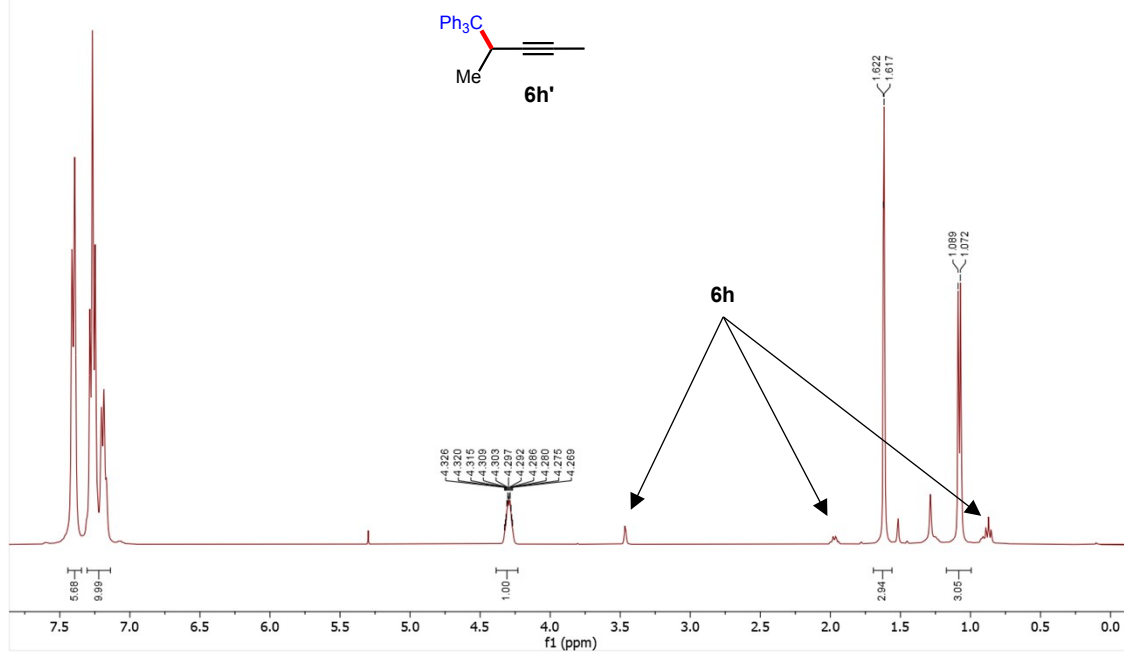

wyd-2-179-2 C

### $^{13}\text{C}$ NMR (100 MHz, $\text{CDCl}_3$ )

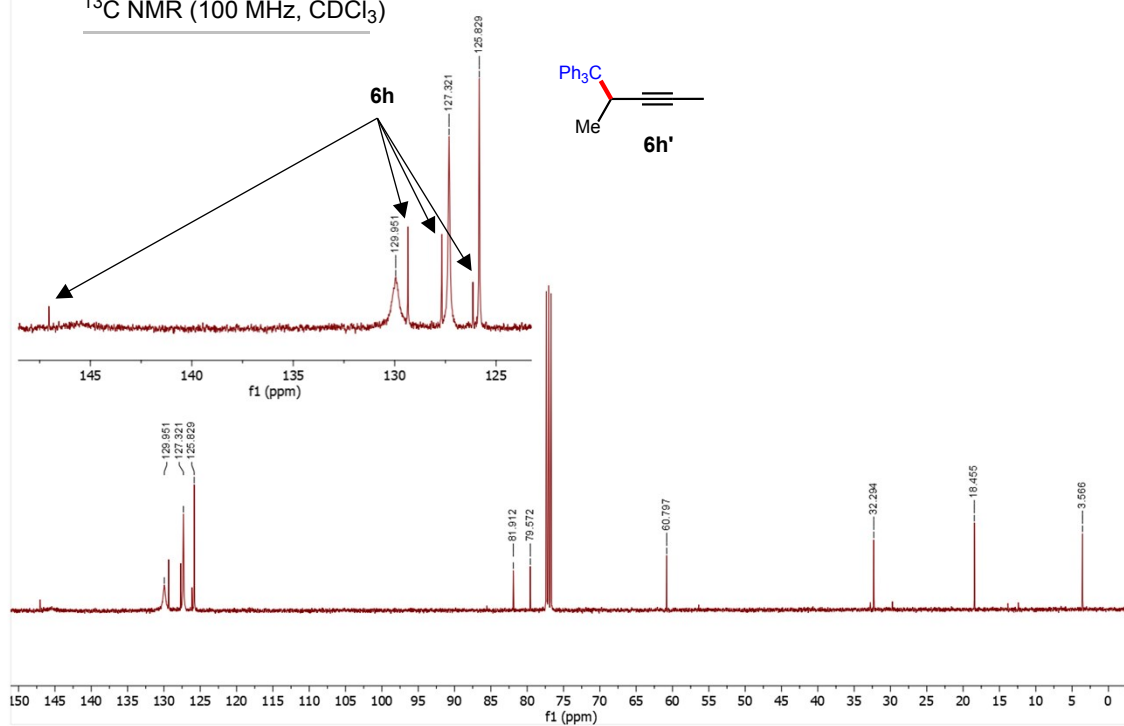

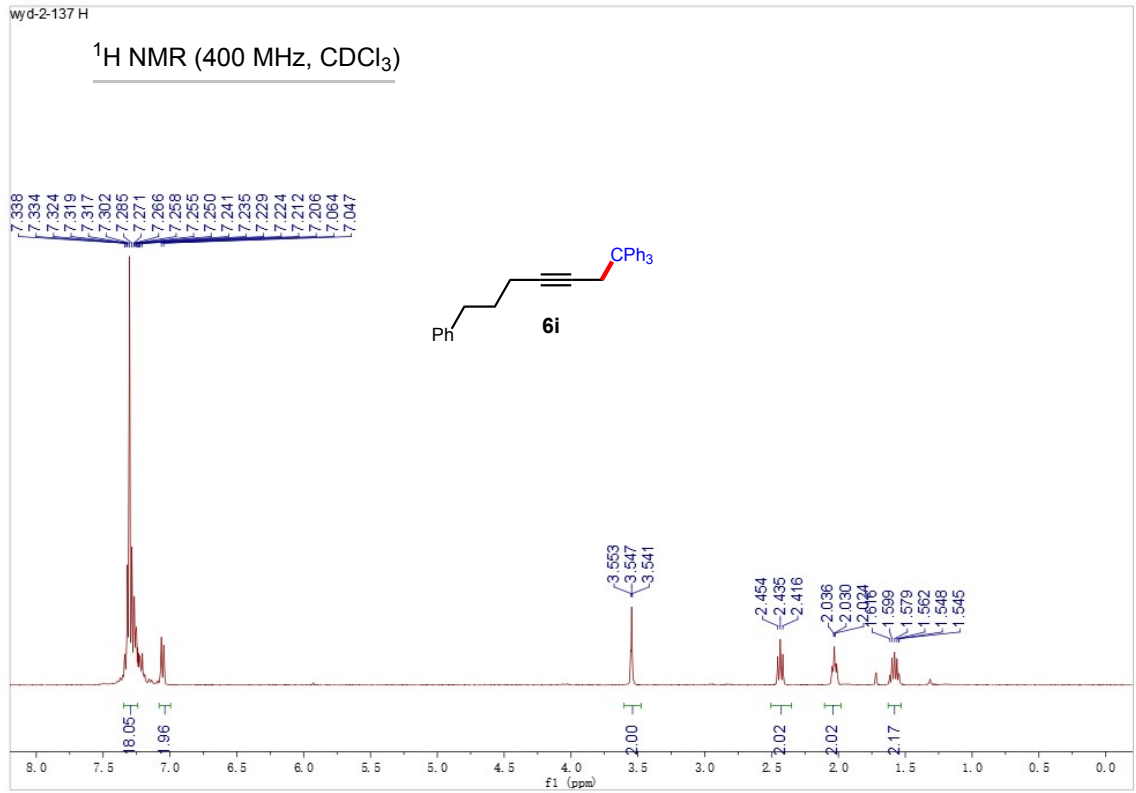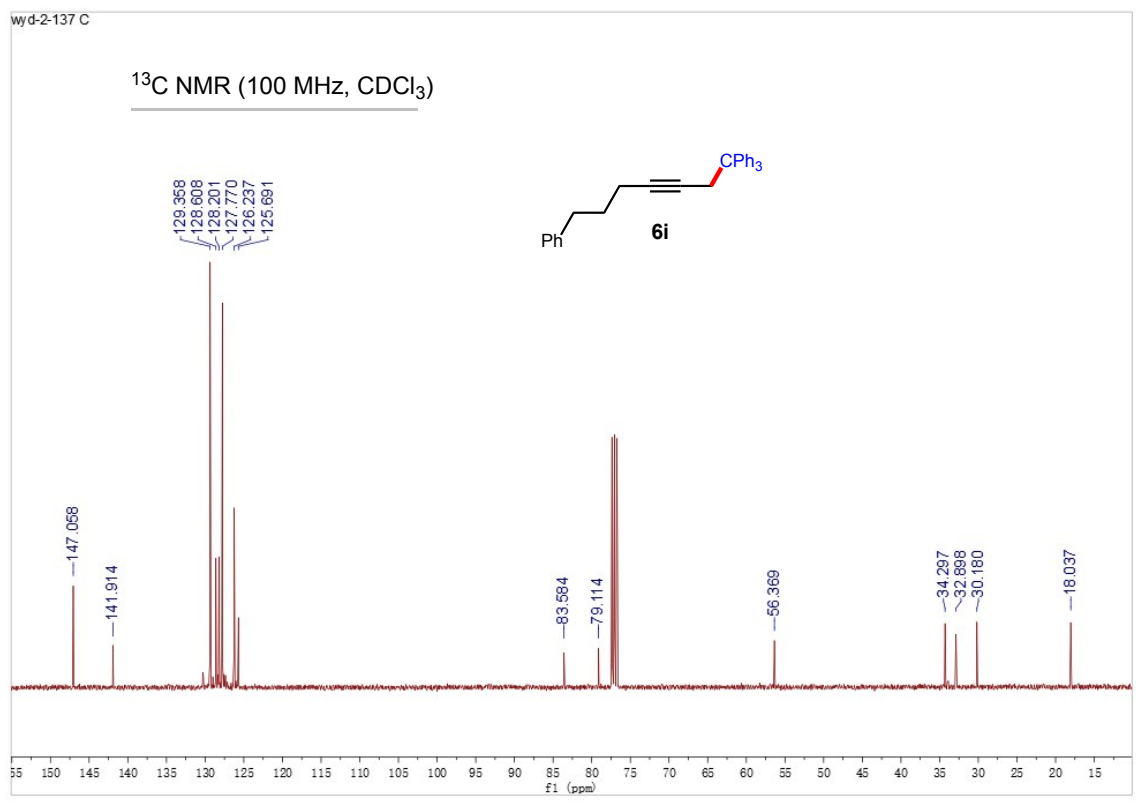



wyd-2-189 H

$^1\text{H}$  NMR (400 MHz,  $\text{CDCl}_3$ )

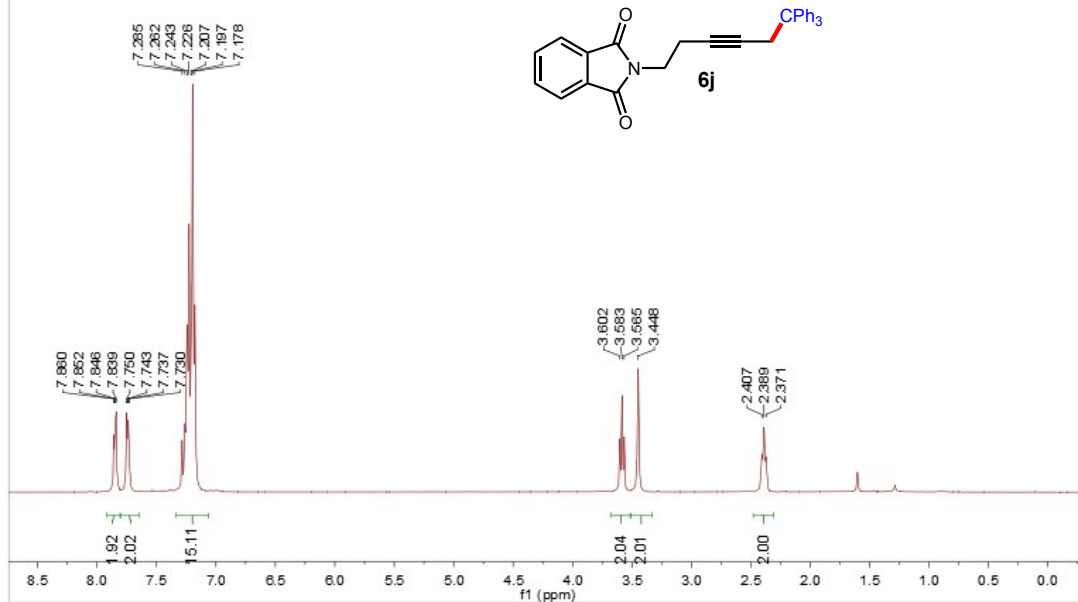

wyd-2-189 C

$^{13}\text{C}$  NMR (100 MHz,  $\text{CDCl}_3$ )

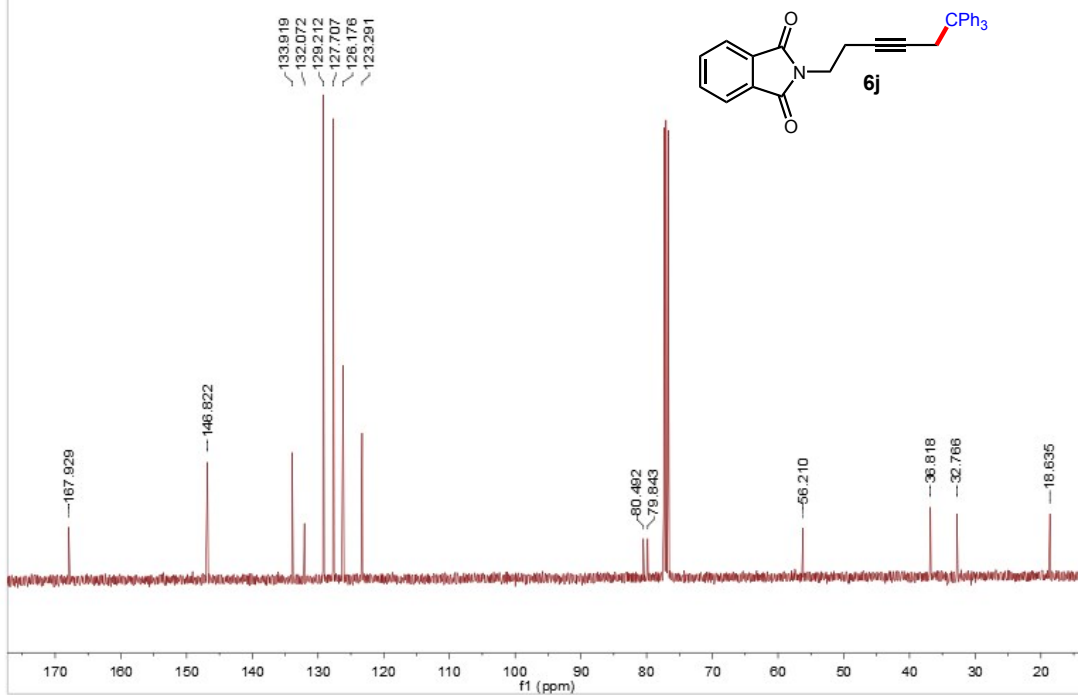

wyd-2-158 H

### $^1\text{H}$ NMR (400 MHz, $\text{CDCl}_3$ )

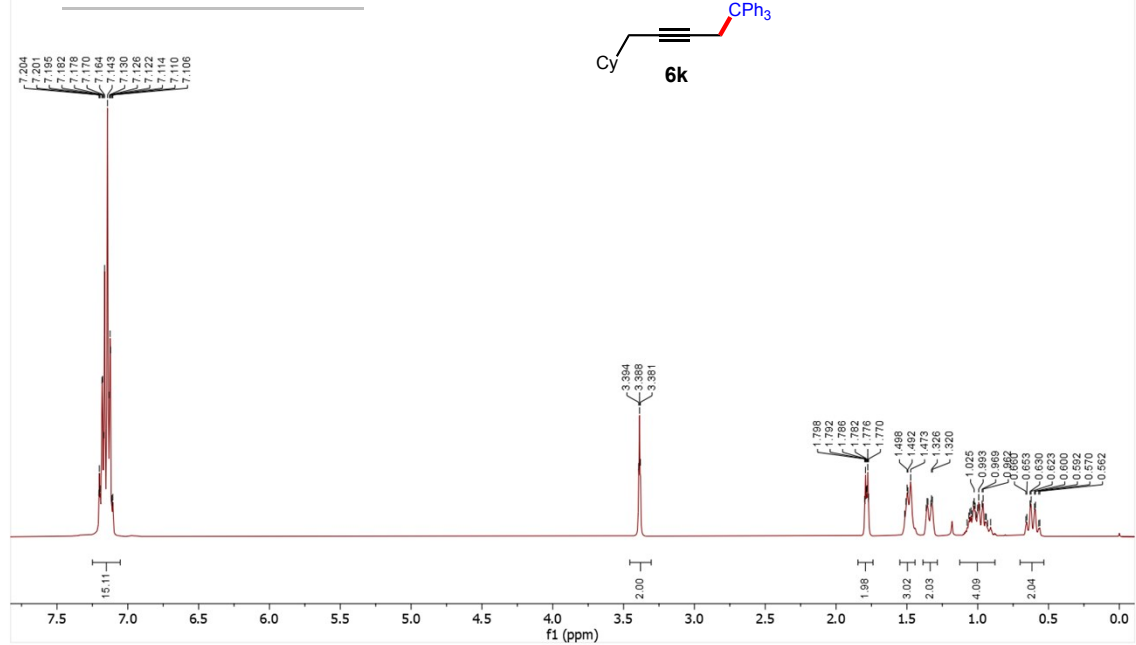

wyd-2-158 C

### $^{13}\text{C}$ NMR (100 MHz, $\text{CDCl}_3$ )

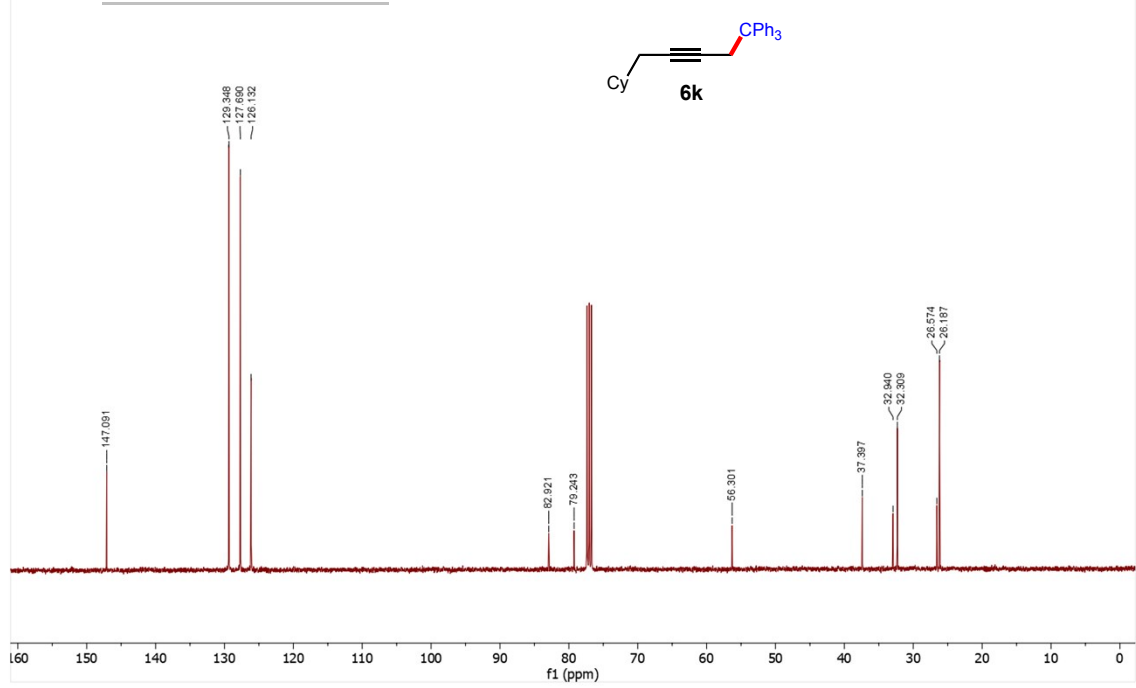

wyd-2-170 H

### $^1\text{H}$ NMR (400 MHz, $\text{CDCl}_3$ )

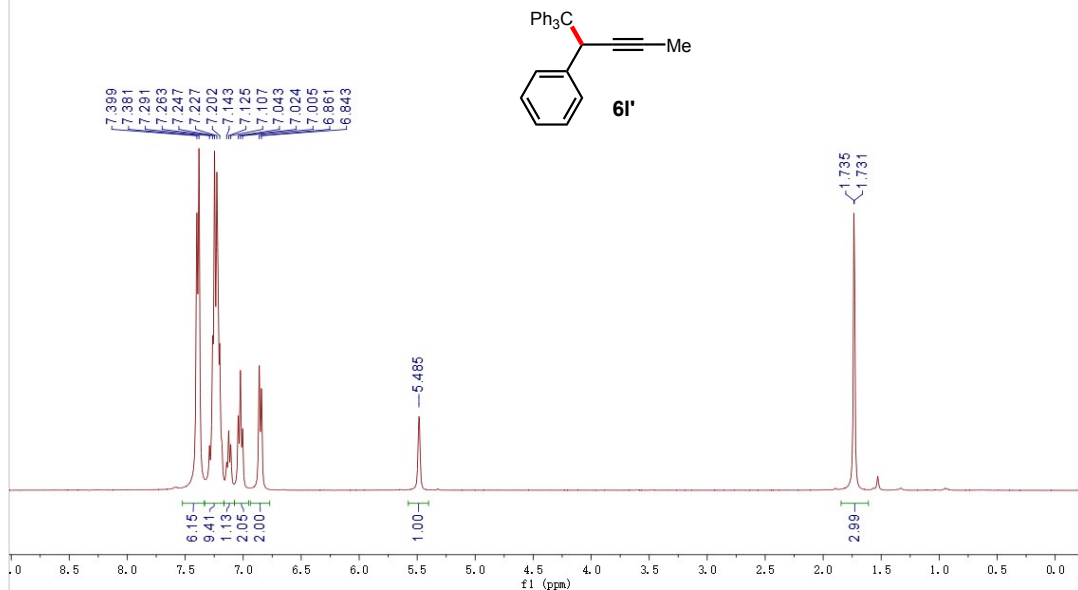

wyd-2-170 C

### $^{13}\text{C}$ NMR (100 MHz, $\text{CDCl}_3$ )

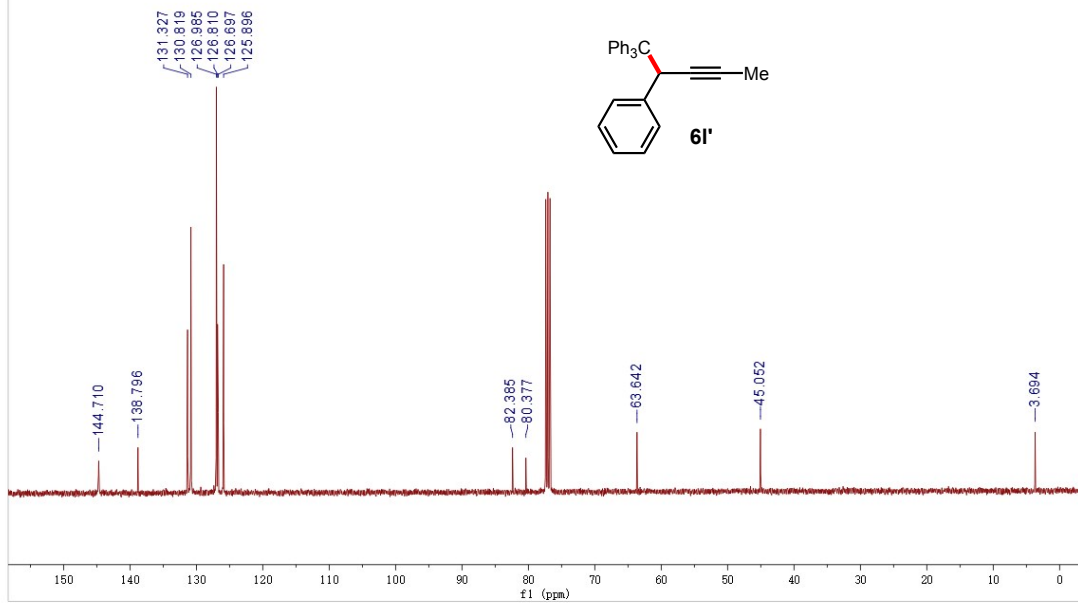

wyd-2-182-2 H

$^1\text{H}$  NMR (500 MHz,  $\text{CDCl}_3$ )

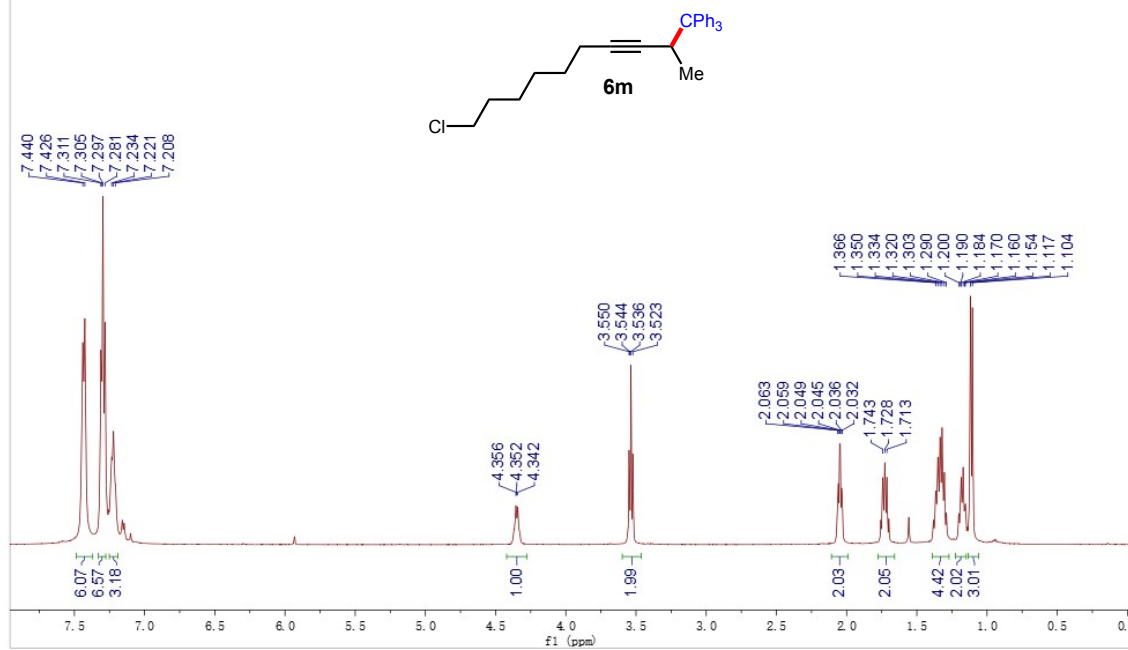

wyd-2-182-2 C

$^{13}\text{C}$  NMR (125 MHz,  $\text{CDCl}_3$ )

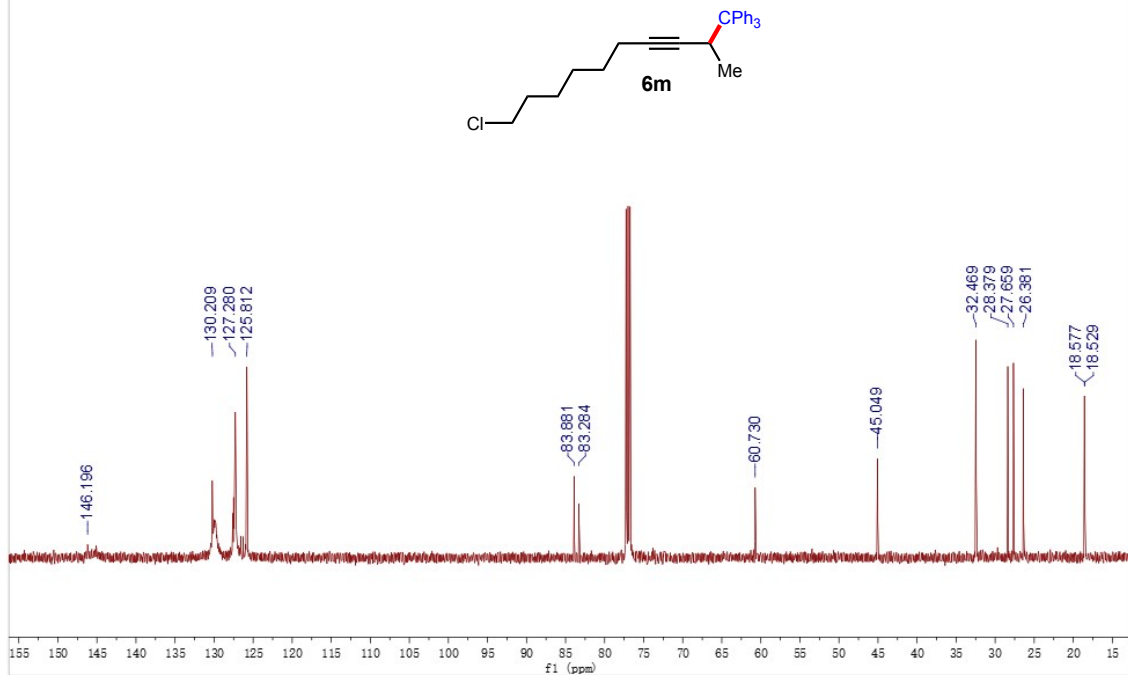

wyd-2-195 H

$^1\text{H}$  NMR (400 MHz,  $\text{CDCl}_3$ )

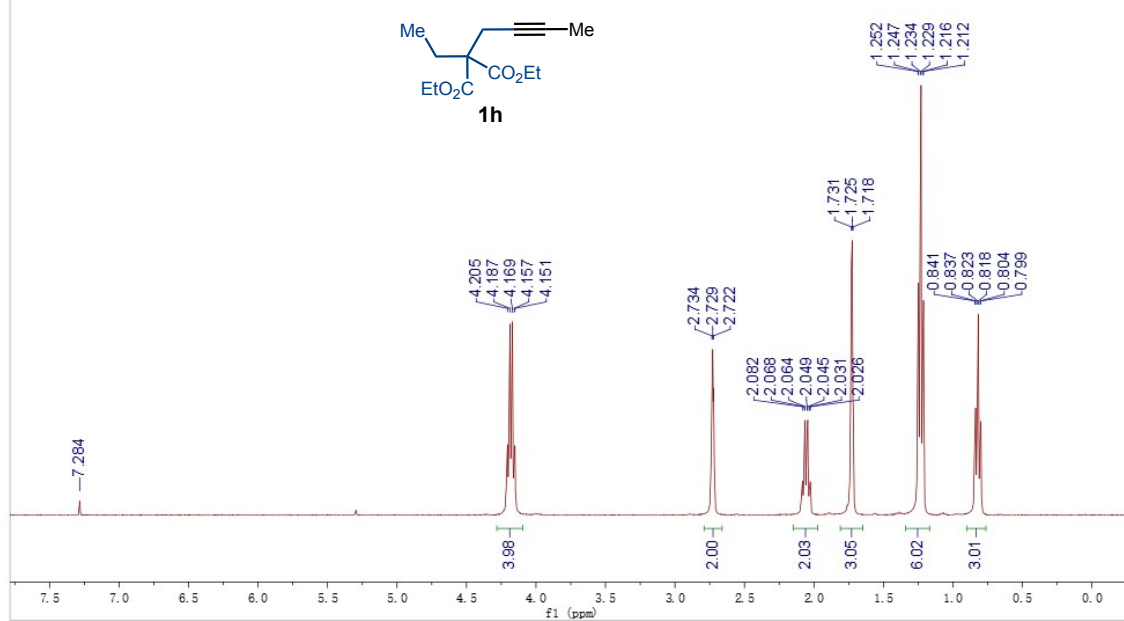

wyd-2-195 C

$^{13}\text{C}$  NMR (100 MHz,  $\text{CDCl}_3$ )

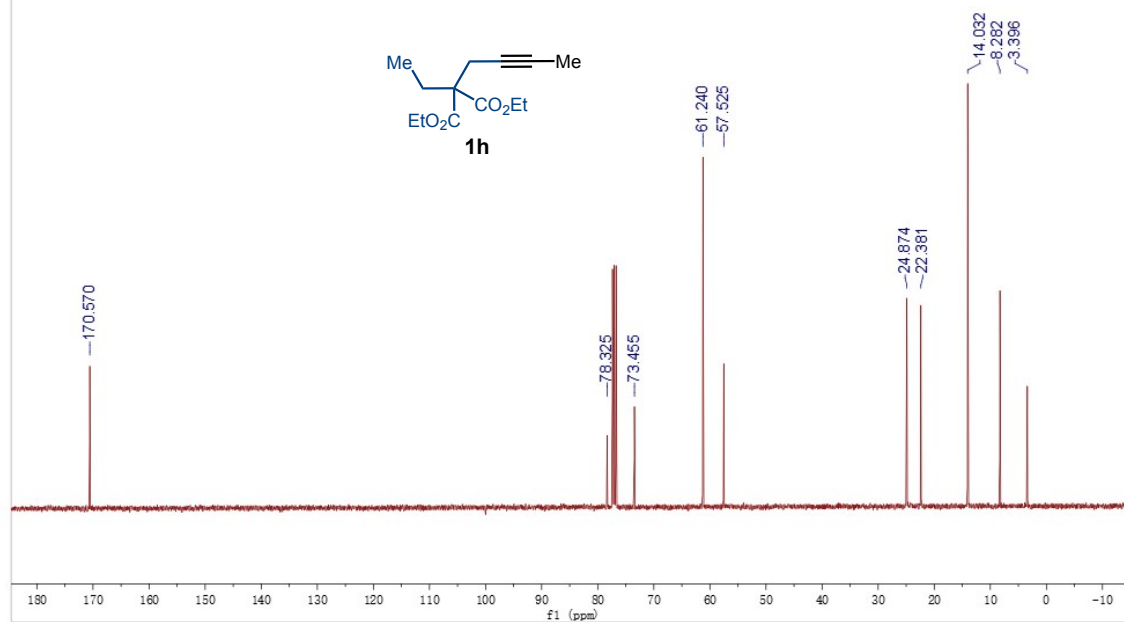

wyd-2-280 H

$^1\text{H}$  NMR (500 MHz,  $\text{CDCl}_3$ )

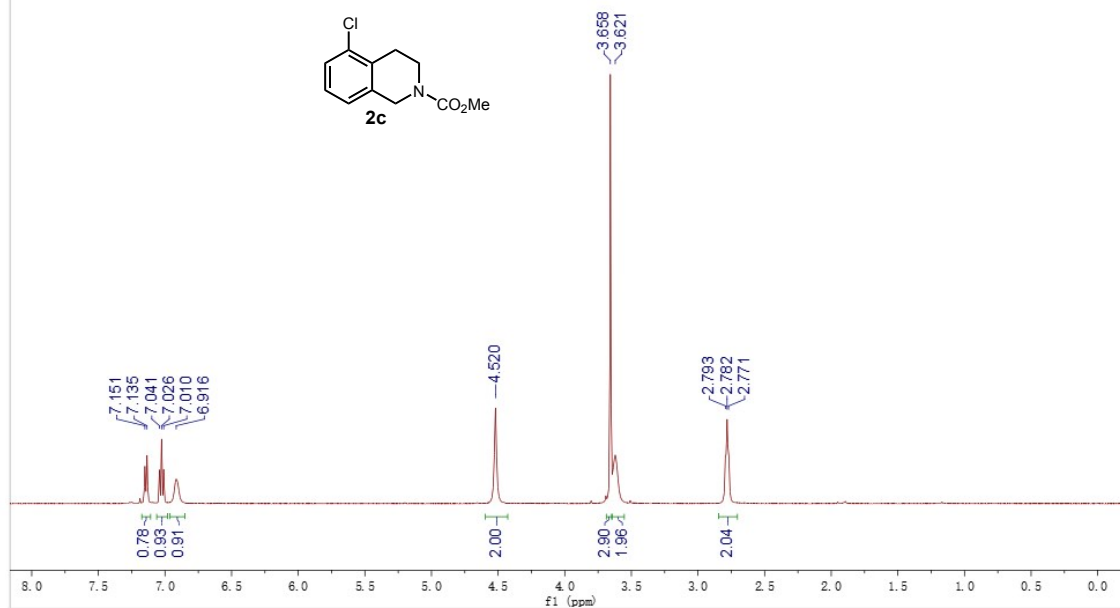

wyd-2-280 C

$^{13}\text{C}$  NMR (125 MHz,  $\text{CDCl}_3$ )

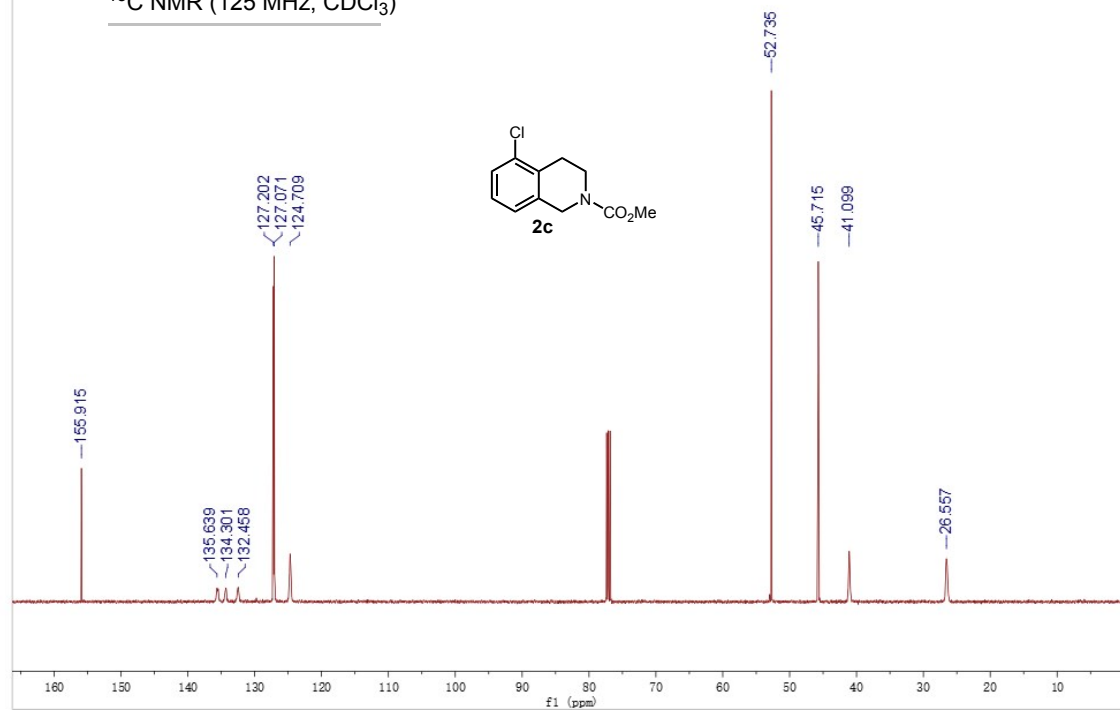

JZ-2-8 H

$^1\text{H}$  NMR (400 MHz,  $\text{CDCl}_3$ )

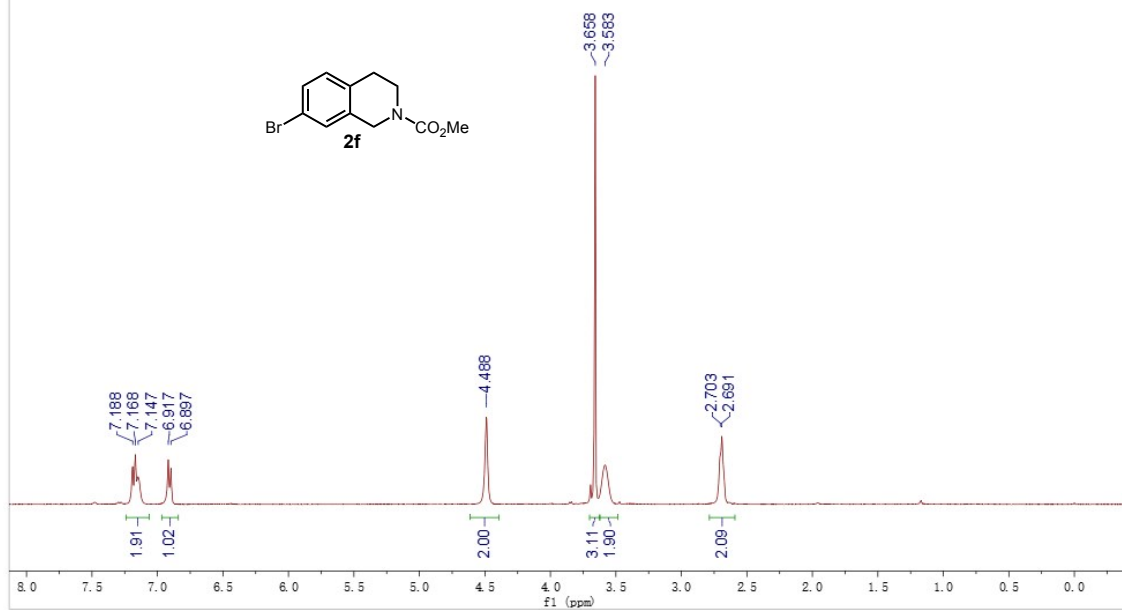

JZ-2-8 C

$^{13}\text{C}$  NMR (100 MHz,  $\text{CDCl}_3$ )

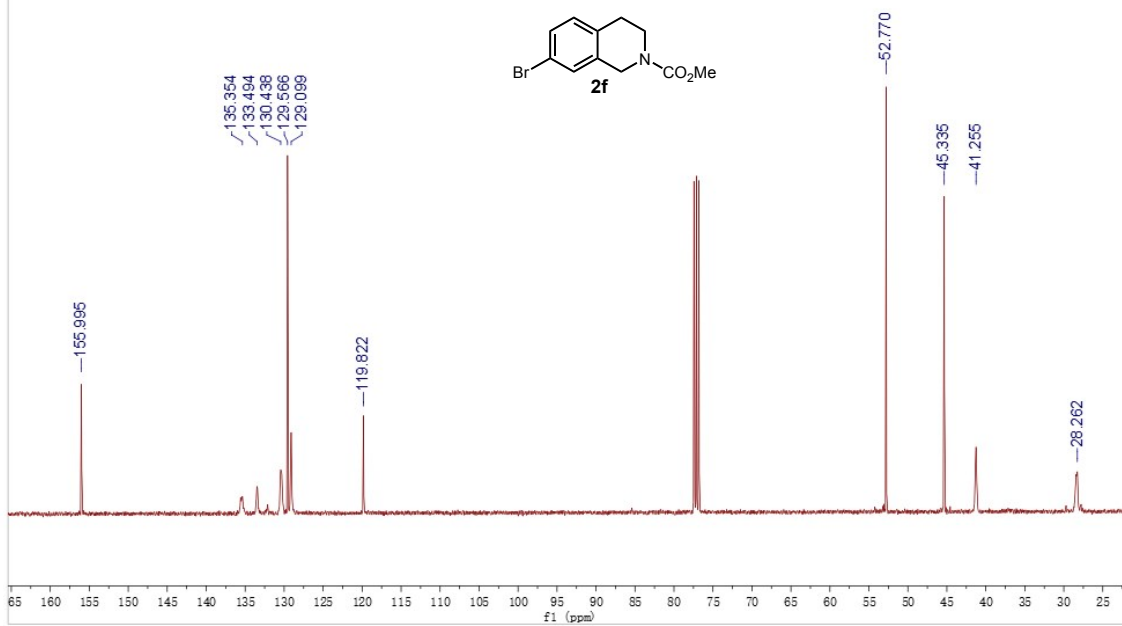

Supplement: SC-011-D0SC05091A-s001.pdf [file SC-011-D0SC05091A-s001.pdf]
